# Supplementary material for: Proteomic Identification of Oxidized Proteins in Entamoeba histolytica by Resin-Assisted Capture: Insights into the Role of Arginase in Resistance to Oxidative Stress
Source: PLoS Negl Trop Dis. 2016 Jan 6;10(1):e0004340. doi: 10.1371/journal.pntd.0004340 (PMC4703340; doi:10.1371/journal.pntd.0004340)
Supplement: S2 Table — (XLSX) [file pntd.0004340.s002.xlsx]

## Sheet: Sheet1
Accession	Description	ΣCoverage	Σ# Unique Peptides	Σ# Peptides	MW [kDa]	calc. pI	Fold enrichment in DTT treated sample
67477982	hypothetical protein [Entamoeba histolytica HM-1:IMSS]	59.59	118	121	184.954	5.12256	2.54368
	Sequence	# PSMs	Protein Group Accessions	Modifications			#VALUE!
	EALTATK	2	67477982				0
	AVDSIKK	2	67477982				0
	TADDMAR	2	67477982				0
	SIDEAIAK	5	67477982				2.66413
	EGIIVEGR	6	67477982				2.12876
	TNLSNLVK	4	67477982				2.01797
	KLAAEQEK	2	67477982				0
	EVDSNLDK	4	67477982				#DIV/0!
	LLIEEIAK	8	67477982				1.44875
	ELNESVNK	4	67477982				3.56639
	TMIEDAKK	4	67477982				0
	QAQEDLIK	2	67477982				0
	ICGTNCIK	4	67477982	C2(Carbamidomethyl); C6(Carbamidomethyl)			4.21802
	VQESIAEAK	6	67477982				3.45722
	ASLVDKENK	8	67477982				3.13404
	KTNLSNLVK	4	67477982				1.58642
	KYQETLDK	4	67477982				3.22338
	VKEDSEVTK	6	67477982				2.7145
	EAQAAAVTAAR	8	67477982				2.95821
	NQIEDLISK	2	67477982				0
	ELAEQMDTK	4	67477982	M6(Oxidation)			4.23634
	QTAAEESKPK	6	67477982				15.7055
	VQESIAEAKK	4	67477982				2.7039
	KVQESIAEAK	4	67477982				2.92322
	EGIENVDSEK	4	67477982				0
	LYNKPEEVK	2	67477982				0
	GGMETLAVANR	2	67477982	M3(Oxidation)			0
	LSEEQIELAK	4	67477982				1.57927
	TIAAAIGQFCK	2	67477982	C10(Carbamidomethyl)			0
	DKQAQEDLIK	11	67477982				2.86472
	ATPDEMQVAVK	6	67477982				2.37215
	VAQSMKPMLGK	4	67477982				0.399998
	ATPDEMQVAVK	4	67477982	M6(Oxidation)			3.6441
	MNDNFDVEPK	2	67477982				0
	TSEIKAEESSK	6	67477982				2.24777
	TQADGEAVPSDK	4	67477982				4.11585
	AGEAVFWNNPK	8	67477982				2.10055
	TIAAAIGQFCK	4	67477982	C10(Nethylmaleimide)			0
	LLQIVYGATFK	6	67477982				9.62207
	QALEDGNMKEK	8	67477982				4.18252
	TIAAAIGQFCK	2	67477982	C10(Nethylmaleimide+water)			0
	EVDSNLDKLIK	2	67477982				#DIV/0!
	IKDTKEEYEK	6	67477982				2.8852
	EAAIQSYKEDR	8	67477982				0.868053
	EGYQQLVDGCR	7	67477982	C10(Carbamidomethyl)			2.89905
	TAFSEPENDAKK	10	67477982				3.50212
	EGIENVDSEKVK	12	67477982				2.32959
	MRELAEQMDTK	8	67477982				3.94957
	VAEALEEENEEK	6	67477982				1.46492
	AEMQELADNIEK	4	67477982				1.43539
	EGYQQLVDGCR	2	67477982	C10(Nethylmaleimide)			0
	QAAVEMQDAVNNK	6	67477982				2.88836
	EGQNVDDVLIPVK	4	67477982				0.803056
	LVPAINDSNTFIK	6	67477982				1.88305
	QAAVEMQDAVNNK	2	67477982	M6(Oxidation)			0
	NEKNPEKEEEAK	8	67477982				10.8642
	NSKPIVPKEEQVK	4	67477982				7.25268
	DMIENADITPEEK	2	67477982				0
	IDKLSEEQIELAK	10	67477982				1.83837
	EPLLDAYADNIQR	4	67477982				#DIV/0!
	RVAEALEEENEEK	3	67477982				0
	IKEDFQTFVDNAK	16	67477982				1.7837
	TQNKVDEDLELLR	14	67477982				1.58981
	LYNKPEEVKSDEK	9	67477982				2.39207
	AITEYIEAIDDALR	6	67477982				3.81532
	EVDSNLDKLIKNPK	2	67477982				0
	VAEALEEENEEKLK	10	67477982				2.32787
	IMEDEGKPIKETEK	6	67477982				1.53296
	EKEGQNVDDVLIPVK	5	67477982				1.48184
	ALNELDKQYEELMK	10	67477982				1.82173
	LKEDVVDALVVEGITK	8	67477982				#DIV/0!
	DFVSSTNENMQEIPK	8	67477982				2.17749
	DFVSSTNENMQEIPK	8	67477982	M10(Oxidation)			2.46499
	QKEPLLDAYADNIQR	2	67477982				#DIV/0!
	RVAEALEEENEEKLK	6	67477982				2.98801
	IAENLSEDLAPSINDSK	6	67477982				0.243662
	LLTDALDDPELDEETR	6	67477982				1.27075
	LKEDVVDALVVEGITKK	6	67477982				1.4329
	DLAEEDYEEYPDIQK	8	67477982				2.00224
	AITEYIEAIDDALRECK	6	67477982	C16(Carbamidomethyl)			8.66607
	QQEALNAQTAAQNASIDEK	12	67477982				2.80888
	QAAVEMQDAVNNKNTGALAK	4	67477982				2.0707
	QSNEKIDKLSEEQIELAK	3	67477982				0
	ELNESVNKMNDNFDVEPK	2	67477982	M9(Oxidation)			0
	KQQEALNAQTAAQNASIDEK	8	67477982				2.14249
	FNVKDEAHENMDGLSDQAK	6	67477982	M11(Oxidation)			0
	TQADGEAVPSDKAEMQELADNIEK	6	67477982				2.96171
	TQADGEAVPSDKAEMQELADNIEK	2	67477982	M15(Oxidation)			0
	NKPPRPEMQMSIQSVAEQSDNIGQIAK	6	67477982				0
	AILDDCKLAEK	1	67477982	C6(Carbamidomethyl)			0
	FNVKDEAHENMDGLSDQAK	1	67477982				0
	LVPAINDSNTFIKDSKDEK	3	67477982				#DIV/0!
	EGYQQLVDGCR	3	67477982	C10(Nethylmaleimide+water)			1.97182
	KIAENLSEDLAPSINDSK	1	67477982				0
	KIKEDFQTFVDNAK	6	67477982				1.95447
	AEMPAVCGDIAVHFR	1	67477982	C7(Carbamidomethyl)			#DIV/0!
	SALEELEK	2	67477982				#DIV/0!
	CPEEDRK	2	67477982	C1(Carbamidomethyl)			#DIV/0!
	KKELEEAK	2	67477982				#DIV/0!
	GGMETLAVANR	4	67477982				#DIV/0!
	TGLSVLENLDK	4	67477982				#DIV/0!
	DVENYENAIK	2	67477982				#DIV/0!
	TAFSEPENDAK	2	67477982				#DIV/0!
	NEELIKELLTMK	2	67477982				#DIV/0!
	KLVPAINDSNTFIK	4	67477982				#DIV/0!
	AITEYIEAIDDALRECK	4	67477982	C16(Nethylmaleimide+water)			#DIV/0!
	FADIAGDLCSAGLQIAEDMR	2	67477982	C9(Carbamidomethyl)			#DIV/0!
	ALDTNNDEDILDCEIACDSAK	2	67477982	C13(Carbamidomethyl); C17(Carbamidomethyl)			#DIV/0!
	KQQEALNAQTAAQNASIDEKIK	4	67477982				#DIV/0!
	EILDAAEEVFTGSSDLTQAANNLK	4	67477982				#DIV/0!
	YSNELLDTVNAYLEDPDNEKLR	4	67477982				#DIV/0!
	LLTDALDDPELDEETRNQIEDLISK	2	67477982				#DIV/0!
	DVENYENAIKDMIENADITPEEKEALLK	2	67477982				#DIV/0!
	VEMEEAKER	1	67477982				#DIV/0!
	YQETLDKIMEDEGKPIKETEK	1	67477982				#DIV/0!
	NLSTQLK	3	67477982				3.11033
	ALSEKER	4	67477982				3.3352
	VEMEEAK	2	67477982				0
	NLEEVKK	2	67477982;67481609				0
	LVDEDPQR	6	67477982				3.99496
	TMIEDAK	2	67477982				#DIV/0!
	VAQSMKPMLGK	4	67477982	M5(Oxidation); M8(Oxidation)			0
	ALSEKERNEELIK	1	67477982				0
	AILDDCK	2	67477982	C6(Carbamidomethyl)			#DIV/0!
	IMEDEGKPIK	1	67477982				#DIV/0!
	ELEEAKK	4	67473092;67477982				12.7797
	AKEVDSNLDK	3	67477982				4.8554
	NEELIK	1	67477982;449703285				#DIV/0!
	NSKPIVPK	2	67477982				4.43119
	LAKEPNER	3	67477982				4.93065
	SQEIVKK	1	67477982				#DIV/0!
	AQPICKDPR	1	67477982	C5(Carbamidomethyl)			#DIV/0!
	IVCSVK	1	67477982	C3(Carbamidomethyl)			#DIV/0!
	Sequence	# PSMs	Protein Group Accessions	Modifications			#VALUE!
	CSIMAAK	4	183232639;472459638	C1(Carbamidomethyl)			9.4352
	CSIMAAK	4	183232639;472459638	C1(Carbamidomethyl); M4(Oxidation)			7.84418
	IFIVSDR	22	183234048;183232639;472459638;449709136				1.87201
	VMDVLKR	6	183232639;472459638				3.55612
	YNGQKPR	7	183232639;472459638				9.83445
	CSIMAAK	14	183232639;472459638	C1(Nethylmaleimide+water)			3.97584
	KLAMWPK	15	183232639;472459638				2.10635
	IDYIVKK	6	183232639;472459638;449706073				3.17603
	ACEELMK	10	183232639;472459638	C2(Carbamidomethyl)			2.59362
	CSIMAAK	6	183232639;472459638	C1(Nethylmaleimide+water); M4(Oxidation)			6.09192
	ACEELMK	4	183232639;472459638	C2(Carbamidomethyl); M6(Oxidation)			2.86913
	QKFIDLR	8	183232639;472459638				3.90176
	ACEELMK	10	183232639;472459638	C2(Nethylmaleimide)			1.69877
	LSPVLAILK	16	183232639;472459638				1.6453
	ACEELMK	13	183232639;472459638	C2(Nethylmaleimide+water)			2.29625
	ATETITGFK	4	183232639;472459638				1.69762
	LVFENLLK	27	183232639;472459638				1.33749
	NNLQWFR	18	183232639;472459638				2.27355
	GIFEDKATK	14	183232639;472459638;449706073				2.82051
	SYNGDLEAR	10	183232639;472459638				2.09131
	AFKFPTMGK	32	183232639;472459638				2.34803
	AFKFPTMGK	13	183232639;472459638	M7(Oxidation)			1.55978
	QKFIDLRK	2	183232639;472459638				0
	QAANDVVMSK	8	183232639;472459638				5.99932
	VPMVKDMEK	6	183232639;472459638				3.30206
	QAANDVVMSK	12	183232639;472459638	M8(Oxidation)			6.95046
	AENTQDGIDK	4	183232639;472459638				3.2829
	VPMVKDMEK	2	183232639;472459638	M3(Oxidation); M7(Oxidation)			#DIV/0!
	EVGPNEPLTR	24	183232639;472459638				1.79996
	AEAMVEFNGR	6	183232639;472459638				0.786649
	RNNLQWFR	6	183232639;472459638				1.39972
	GHSAAIHSNDK	16	183232639;472459638				4.00498
	AEAMVEFNGR	4	183232639;472459638	M4(Oxidation)			0
	IFFEPHSIR	48	183232639;472459638				1.9217
	VGAAFHLPHGR	8	183232639;472459638				1.37777
	YLAELKELSK	24	183232639;472459638				2.80266
	EKLSPVLAILK	40	183232639;472459638				1.67567
	CVAVLLPHVIR	20	183232639;472459638	C1(Carbamidomethyl)			1.54019
	SYNGDLEAREK	4	183232639;472459638				0.924837
	YMELAQMVGLK	18	183232639;472459638				1.75648
	YMELAQMVGLK	14	183232639;472459638	M7(Oxidation)			0.903794
	YMELAQMVGLK	6	183232639;472459638	M2(Oxidation); M7(Oxidation)			0.683601
	CVAVLLPHVIR	55	183232639;472459638	C1(Nethylmaleimide)			1.52416
	CVAVLLPHVIR	38	183232639;472459638	C1(Nethylmaleimide+water)			1.57361
	QANIDEAAWMSK	12	183232639;472459638				1.5016
	QANIDEAAWMSK	16	183232639;472459638	M10(Oxidation)			1.6578
	EIYDQVVEEMK	8	183232639;472459638				1.58096
	CNTPAEGVEAFAK	16	183232639;472459638	C1(Carbamidomethyl)			1.93689
	EIYDQVVEEMK	2	183232639;472459638	M10(Oxidation)			0
	EAVKLVFENLLK	22	183232639;472459638				2.43104
	TLGAYFINEEEK	12	183232639;472459638				1.75739
	LGYVDRVMDVLK	10	183232639;472459638	M8(Oxidation)			1.41205
	EYLKPEYTQEK	16	183232639;472459638;449706073				1.75253
	NPIVFSFHPSALK	28	183232639;472459638				2.81738
	CNTPAEGVEAFAK	20	183232639;472459638	C1(Nethylmaleimide)			0.912573
	CNTPAEGVEAFAK	20	183232639;472459638	C1(Nethylmaleimide+water)			0.91849
	VPEDCNIICAVCK	15	183232639;472459638	C5(Carbamidomethyl); C9(Carbamidomethyl); C12(Carbamidomethyl)			2.29388
	TLGAYFINEEEKAK	23	183232639;472459638				3.45274
	NIFACEHVTHEMR	18	183232639;472459638	C5(Carbamidomethyl)			3.06163
	VPEDCNIICAVCK	8	183232639;472459638	C5(Nethylmaleimide); C9(Carbamidomethyl); C12(Carbamidomethyl)			1.00012
	NIFACEHVTHEMR	13	183232639;472459638	C5(Carbamidomethyl); M12(Oxidation)			1.23542
	GHSAAIHSNDKAVVEK	4	183232639;472459638				0
	VPEDCNIICAVCK	8	183232639;472459638	C5(Nethylmaleimide+water); C9(Carbamidomethyl); C12(Carbamidomethyl)			#DIV/0!
	NIFACEHVTHEMR	20	183232639;472459638	C5(Nethylmaleimide)			2.24786
	VPEDCNIICAVCK	8	183232639;472459638	C5(Carbamidomethyl); C9(Nethylmaleimide); C12(Nethylmaleimide)			0
	TRNPIVFSFHPSALK	27	183232639;472459638				2.36113
	NIFACEHVTHEMR	18	183232639;472459638	C5(Nethylmaleimide+water)			2.59512
	VPEDCNIICAVCK	6	183232639;472459638	C5(Carbamidomethyl); C9(Nethylmaleimide+water); C12(Nethylmaleimide)			0
	ADQRYMELAQMVGLK	2	183232639;472459638	M6(Oxidation)			0
	FMFGVNAYSADVNNAR	19	183232639;472459638				4.35997
	VPEDCNIICAVCK	4	183232639;472459638	C5(Nethylmaleimide); C9(Nethylmaleimide); C12(Nethylmaleimide)			0
	FMFGVNAYSADVNNAR	15	183232639;472459638	M2(Oxidation)			2.54428
	CPGMSPQWFAEQVGIK	18	183232639;472459638	C1(Carbamidomethyl)			15.049
	ACEELMKATETITGFK	2	183232639;472459638	C2(Carbamidomethyl); M6(Oxidation)			0
	CPGMSPQWFAEQVGIK	16	183232639;472459638	C1(Carbamidomethyl); M4(Oxidation)			6.33872
	CPGMSPQWFAEQVGIK	6	183232639;472459638	C1(Nethylmaleimide+water)			#DIV/0!
	TLGAYFINEEEKAKLEK	26	183232639;472459638				2.51482
	LMNHPGVATILATGGNAMVK	22	183232639;472459638				3.17303
	LMNHPGVATILATGGNAMVK	36	183232639;472459638	M2(Oxidation)			2.40491
	LMNHPGVATILATGGNAMVK	16	183232639;472459638	M2(Oxidation); M18(Oxidation)			1.27415
	AQVALKEYLKPEYTQEK	18	183232639;472459638;449706073				1.44899
	VPEMALLAFEDQCSPANPR	20	183232639;472459638	C13(Carbamidomethyl)			1.97461
	EYLKPEYTQEKIDYIVK	18	183232639;472459638;449706073				1.69943
	VPEMALLAFEDQCSPANPR	16	183232639;472459638	M4(Oxidation); C13(Carbamidomethyl)			1.00501
	IMWLLYEHPEADFFAMK	8	183232639;472459638	M2(Oxidation); M16(Oxidation)			4.26169
	AENTQDGIDKAEAMVEFNGR	26	183232639;472459638				1.62208
	AENTQDGIDKAEAMVEFNGR	16	183232639;472459638	M14(Oxidation)			0.787157
	VPEMALLAFEDQCSPANPR	22	183232639;472459638	C13(Nethylmaleimide)			1.84089
	VPEMALLAFEDQCSPANPR	6	183232639;472459638	M4(Oxidation); C13(Nethylmaleimide)			0
	VPEMALLAFEDQCSPANPR	27	183232639;472459638	C13(Nethylmaleimide+water)			1.83069
	ASVAALDQHCALAVAAVEETGR	4	472459638	C10(Carbamidomethyl)			1.78126
	VPEMALLAFEDQCSPANPR	4	183232639;472459638	M4(Oxidation); C13(Nethylmaleimide+water)			19.2772
	AAYSSGKPALGVGAGNVPTYIEK	28	183232639;472459638				2.13013
	EYLKPEYTQEKIDYIVKK	9	183232639;472459638;449706073				2.12026
	GLAVMNTFGPDNIIAIGGGSAMDAAK	22	183232639;472459638				9.09517
	GLAVMNTFGPDNIIAIGGGSAMDAAK	28	183232639;472459638	M22(Oxidation)			2.60369
	GLAVMNTFGPDNIIAIGGGSAMDAAK	6	183232639;472459638	M5(Oxidation); M22(Oxidation)			0.973761
	DAAIAAGAPENCIQWIEFGGIEASNK	26	472459638	C12(Carbamidomethyl)			23.5829
	YMELAQMVGLKCNTPAEGVEAFAK	2	183232639;472459638	C12(Nethylmaleimide+water)			#DIV/0!
	DAAIAAGAPENCIQWIEFGGIEASNK	4	472459638	C12(Nethylmaleimide)			76.7796
	LICIPTTSGTGSEVTPFAVISDHETGK	8	183232639;472459638	C3(Carbamidomethyl)			2.12031
	KYPLADYSLTPSVAIVDPMFTMSLPK	6	183232639;472459638				#DIV/0!
	LICIPTTSGTGSEVTPFAVISDHETGK	10	183232639;472459638	C3(Nethylmaleimide)			1.15239
	KYPLADYSLTPSVAIVDPMFTMSLPK	22	183232639;472459638	M22(Oxidation)			12.0704
	LICIPTTSGTGSEVTPFAVISDHETGK	6	183232639;472459638	C3(Nethylmaleimide+water)			2.24547
	KYPLADYSLTPSVAIVDPMFTMSLPK	8	183232639;472459638	M19(Oxidation); M22(Oxidation)			2.13552
	LICIPTTSGTGSEVTPFAVISDHETGKK	10	183232639;472459638	C3(Carbamidomethyl)			1.53738
	LICIPTTSGTGSEVTPFAVISDHETGKK	2	183232639;472459638	C3(Nethylmaleimide)			0
	NIFACEHVTHEMR	2	183232639;472459638	C5(Nethylmaleimide+water); M12(Oxidation)			0.311457
	NIFACEHVTHEMR	2	183232639;472459638	C5(Nethylmaleimide); M12(Oxidation)			0
	CSIMAAK	9	183232639;472459638	C1(Nethylmaleimide)			3.6514
	LGYVDRVMDVLKR	1	183232639;472459638	M8(Oxidation)			0
	IMWLLYEHPEADFFAMK	3	183232639;472459638				#DIV/0!
	IMWLLYEHPEADFFAMK	12	183232639;472459638	M16(Oxidation)			#DIV/0!
	KASVAALDQHCALAVAAVEETGR	2	472459638	C11(Carbamidomethyl)			#DIV/0!
	YPLADYSLTPSVAIVDPMFTMSLPK	2	183232639;472459638				#DIV/0!
	AQVALKEYLKPEYTQEKIDYIVK	4	183232639;472459638;449706073				#DIV/0!
	YPLADYSLTPSVAIVDPMFTMSLPK	4	183232639;472459638	M21(Oxidation)			#DIV/0!
	YPLADYSLTPSVAIVDPMFTMSLPK	2	183232639;472459638	M18(Oxidation); M21(Oxidation)			#DIV/0!
	DAAIAAGAPENCIQWIEFGGIEASNK	18	472459638	C12(Nethylmaleimide+water)			#DIV/0!
	SFDNGMICASEQAAIIDKEIYDQVVEEMK	2	183232639;472459638	M6(Oxidation); C8(Carbamidomethyl)			#DIV/0!
	CPGMSPQWFAEQVGIKVPEDCNIICAVCK	1	183232639;472459638	C1(Carbamidomethyl); M4(Oxidation); C21(Carbamidomethyl); C25(Carbamidomethyl); C28(Carbamidomethyl)			#DIV/0!
	CPGMSPQWFAEQVGIKVPEDCNIICAVCK	3	183232639;472459638	C1(Carbamidomethyl); M4(Oxidation); C21(Nethylmaleimide+water); C28(Nitrosyl)			#DIV/0!
	TVGIINVDPLYGITEIAEPVGVVCGVTPVTNPTSTAIFK	4	183232639;472459638	C24(Carbamidomethyl)			#DIV/0!
	TVGIINVDPLYGITEIAEPVGVVCGVTPVTNPTSTAIFK	4	183232639;472459638	C24(Nethylmaleimide+water)			#DIV/0!
	AAYSSGKPALGVGAGNVPTYIEKTCNIK	1	183232639;472459638	C25(Nethylmaleimide+water)			#DIV/0!
	LICIPTTSGTGSEVTPFAVISDHETGKK	2	183232639;472459638	C3(Nethylmaleimide+water)			#DIV/0!
	SLISIK	15	449704068;183232639;472459638				2.79967
	ACEELMK	3	183232639;472459638	C2(Nethylmaleimide+water); M6(Oxidation)			0
	ACEELMK	2	183232639;472459638	C2(Nethylmaleimide); M6(Oxidation)			#DIV/0!
	VPMVKDMEK	2	183232639;472459638	M7(Oxidation)			#DIV/0!
	VMDVLK	10	183232639;472459638	M2(Oxidation)			2.39115
	LGYVDR	10	183232639;472459638				2.98101
	KLAMWPK	5	183232639;472459638	M4(Oxidation)			0.975052
	LAMWPK	5	183232639;472459638				2.13595
	IDYIVK	4	183232639;472459638;449706073				1.81428
	AQVALK	2	183232639;472459638;449706073				#DIV/0!
	VMDVLK	6	183232639;472459638				3.11496
	VPEDCNIICAVCK	1	183232639;472459638	C5(Nethylmaleimide); C9(Nethylmaleimide+water); C12(Nethylmaleimide)			0
	YALTMK	8	183232639;472459638				3.19519
	FPTMGK	2	183232639;472459638	M4(Oxidation)			3.45433
	YALTMK	7	183232639;472459638	M5(Oxidation)			4.19645
	CSIMAAK	2	183232639;472459638	C1(Nethylmaleimide); M4(Oxidation)			4.20087
	LAMWPK	1	183232639;472459638	M3(Oxidation)			#DIV/0!
	YLAELK	3	183234048;183232639;472459638;449709136				2.29483
	FIDLRK	1	183232639;472459638				#DIV/0!
	VPEMALLAFEDQCSPANPR	1	183232639;472459638	M4(Oxidation); C13(Oxidation)			#DIV/0!
	FPTMGK	1	183232639;472459638				0
67478039	hypothetical protein [Entamoeba histolytica HM-1:IMSS]	64.31	40	67	119.432	5.87158	18.1655
	Sequence	# PSMs	Protein Group Accessions	Modifications			#VALUE!
	LIGGKEPR	2	67478039				0
	TDSCNVDSR	4	67478039	C4(Carbamidomethyl)			21.9991
	LFSPTEENK	8	67478039;67473255				19.6613
	ASDCVSITTK	6	67478039	C4(Carbamidomethyl)			25.0573
	SCAQLNNNCK	4	67478039;67473255	C2(Carbamidomethyl); C9(Carbamidomethyl)			44.2054
	VECVTCTEQR	4	67478039	C3(Carbamidomethyl); C6(Carbamidomethyl)			30.0291
	SSHLTSTDGPCK	10	67478039;449705993	C11(Carbamidomethyl)			23.0184
	ASDNTYYCPLK	6	67478039;67473255	C8(Carbamidomethyl)			15.6045
	VNEFCDSCNSK	4	67478039;67473255	C5(Carbamidomethyl); C8(Carbamidomethyl)			11.1996
	GTCIPCTSPCTK	7	67478039;67473255;449705993	C3(Carbamidomethyl); C6(Carbamidomethyl); C10(Carbamidomethyl)			20.624
	SCNKFPEHCSK	6	67478039	C2(Carbamidomethyl); C9(Carbamidomethyl)			21.911
	KVECVTCTEQR	6	67478039	C4(Carbamidomethyl); C7(Carbamidomethyl)			14.0976
	LFSPTEENKCTK	10	67478039;67473255	C10(Carbamidomethyl)			17.7268
	SVLGTSGNNHQVCK	16	67478039	C13(Carbamidomethyl)			16.7303
	DLYLPYYFSVTK	11	67478039;67473255				28.8953
	DCEEQETGCNSEK	4	67478039;67473255;449705993	C2(Carbamidomethyl); C9(Carbamidomethyl)			38.8461
	NNVNICESCLLMK	8	67478039	C6(Carbamidomethyl); C9(Carbamidomethyl)			22.0482
	CPASCSSCSYDSSK	6	67478039	C1(Carbamidomethyl); C5(Carbamidomethyl); C8(Carbamidomethyl)			53.8036
	NNVNICESCLLMK	6	67478039	C6(Carbamidomethyl); C9(Carbamidomethyl); M12(Oxidation)			14.4357
	GYDQYEQYLNAFK	17	67478039;67473255				23.7787
	GTSDNTITIGCVGQLR	14	67478039	C11(Carbamidomethyl)			12.8668
	KDCEEQETGCNSEK	6	67478039;67473255;449705993	C3(Carbamidomethyl); C10(Carbamidomethyl)			85.6604
	NKENECACINDGYK	10	67478039	C6(Carbamidomethyl); C8(Carbamidomethyl)			21.3441
	KCPASCSSCSYDSSK	6	67478039	C2(Carbamidomethyl); C6(Carbamidomethyl); C9(Carbamidomethyl)			11.2517
	CGECIIGMSTTVDGSK	4	67478039	C1(Carbamidomethyl); C4(Carbamidomethyl); M8(Oxidation)			0
	TGFIYATECSDGFSGR	10	67478039	C9(Carbamidomethyl)			4.59125
	CSLCPDPFTECLTSK	8	67478039	C1(Carbamidomethyl); C4(Carbamidomethyl); C11(Carbamidomethyl)			20.8968
	TANGNICTQCPVGSHVGK	6	67478039	C7(Carbamidomethyl); C10(Carbamidomethyl)			14.9353
	VNEFCDSCNSKDCLR	4	67478039;67473255	C5(Carbamidomethyl); C8(Carbamidomethyl); C13(Carbamidomethyl)			8.80746
	VVCSECYENIQGVTTR	14	67478039	C3(Carbamidomethyl); C6(Carbamidomethyl)			23.0565
	LPGCLLCSDDDTICYK	8	67478039;67473255;449705993	C4(Carbamidomethyl); C7(Carbamidomethyl); C14(Carbamidomethyl)			18.8309
	MRGYDQYEQYLNAFK	8	67478039;67473255	M1(Oxidation)			24.5858
	SKVVCSECYENIQGVTTR	8	67478039	C5(Carbamidomethyl); C8(Carbamidomethyl)			12.9364
	HIPTSIDK	1	67478039				0
	CQLCSTK	2	67478039;67473255;449705993	C1(Carbamidomethyl); C4(Carbamidomethyl)			#DIV/0!
	HMPHCTK	4	67478039;67473255	C5(Carbamidomethyl)			#DIV/0!
	EGPNAEDKK	2	67478039				#DIV/0!
	TAFSYYDK	6	67478039				#DIV/0!
	CTYCVNGK	2	67478039;449705993	C1(Carbamidomethyl); C4(Carbamidomethyl)			#DIV/0!
	CNAEYLEAK	4	67478039;67473255	C1(Carbamidomethyl)			#DIV/0!
	CTVSDGVCVK	6	67478039;67473255	C1(Carbamidomethyl); C8(Carbamidomethyl)			#DIV/0!
	KTDSCNVDSR	2	67478039	C5(Carbamidomethyl)			#DIV/0!
	CTQKNDKINK	2	67478039	C1(Carbamidomethyl)			#DIV/0!
	EVNTSSHSGNDK	4	67478039				#DIV/0!
	TCTLKEDMCK	4	67478039	C2(Carbamidomethyl); C9(Carbamidomethyl)			#DIV/0!
	TCTLKEDMCK	2	67478039	C2(Carbamidomethyl); M8(Oxidation); C9(Carbamidomethyl)			#DIV/0!
	SCAQLNNNCKK	4	67478039	C2(Carbamidomethyl); C9(Carbamidomethyl)			#DIV/0!
	TECENGYYLEK	2	67478039;449705993	C3(Carbamidomethyl)			#DIV/0!
	ENECACINDGYK	2	67478039	C4(Carbamidomethyl); C6(Carbamidomethyl)			#DIV/0!
	CGECIIGMSTTVDGSK	2	67478039	C1(Carbamidomethyl); C4(Carbamidomethyl)			#DIV/0!
	TCDKCFGMYSLQGGK	4	67478039	C2(Carbamidomethyl); C5(Carbamidomethyl)			#DIV/0!
	TCDKCFGMYSLQGGK	2	67478039	C2(Carbamidomethyl); C5(Carbamidomethyl); M8(Oxidation)			#DIV/0!
	CTGEGECTTCEDGWK	4	67478039;67473255	C1(Carbamidomethyl); C7(Carbamidomethyl); C10(Carbamidomethyl)			#DIV/0!
	EVNTSSHSGNDKCVCK	2	67478039	C13(Carbamidomethyl); C15(Carbamidomethyl)			#DIV/0!
	ASDCVSITTKLPSCER	3	67478039	C4(Carbamidomethyl); C14(Carbamidomethyl)			#DIV/0!
	MRGYDQYEQYLNAFK	6	67478039;67473255				#DIV/0!
	TANGNICTQCPVGSHVGK	2	67478039	C7(Nethylmaleimide+water)			#DIV/0!
	CSCGDAHYFDKDNVCK	2	67478039	C1(Carbamidomethyl); C3(Carbamidomethyl); C15(Carbamidomethyl)			#DIV/0!
	INGNQCLTCMEGYYLSK	8	67478039	C6(Carbamidomethyl); C9(Carbamidomethyl)			#DIV/0!
	CATCSDKDTCLTCADPLK	1	67478039;449705993	C1(Carbamidomethyl); C4(Carbamidomethyl); C10(Carbamidomethyl); C13(Carbamidomethyl)			#DIV/0!
	TANGNICTQCPVGSHVGKDGK	2	67478039	C7(Carbamidomethyl); C10(Carbamidomethyl)			#DIV/0!
	VISGNGCNSCVDGFYFDEIK	2	67478039;449705993	C7(Carbamidomethyl); C10(Carbamidomethyl)			#DIV/0!
	CDNGYFLTTSGTCSPNLYDGFK	2	67478039	C1(Carbamidomethyl); C13(Carbamidomethyl)			#DIV/0!
	NKENECACINDGYKEGPNAEDK	2	67478039	C6(Carbamidomethyl); C8(Carbamidomethyl)			#DIV/0!
	CILQVENSCNQCADGYSLSTDKK	4	67478039	C1(Carbamidomethyl); C9(Carbamidomethyl); C12(Carbamidomethyl)			#DIV/0!
	CILQVENSCNQCADGYSLSTDKK	2	67478039	C1(Carbamidomethyl); C9(Nethylmaleimide+water)			#DIV/0!
	ASDNTYYCPLKDLYLPYYFSVTK	2	67478039;67473255	C8(Carbamidomethyl)			#DIV/0!
	APECACPTGTVQLENGTCQSCSDLSK	4	67478039	C4(Nitrosyl); C6(Nethylmaleimide+water); C21(Carbamidomethyl)			#DIV/0!
	CTICTVDNPNNLSEGNECSIYNAEHCTSCNKR	7	67478039	C1(Carbamidomethyl); C4(Carbamidomethyl); C18(Nethylmaleimide+water); C29(Nitrosyl)			#DIV/0!
	EAVPHCASVSNGACTSCDTGYELTTTGNNK	1	67478039	C6(Oxidation); C14(Carbamidomethyl); C17(Nethylmaleimide+water)			#DIV/0!
	CDNGYFLTTSGTCSPNLYDGFK	1	67478039	C13(Nethylmaleimide+water)			#DIV/0!
	IVEECTK	2	67478039;67473255;449705993	C5(Carbamidomethyl)			0
	CDDKCATCSDKDTCLTCADPLK	7	67478039;449705993	C1(Nethylmaleimide+water); C5(Nitrosyl); C14(Carbamidomethyl); C17(Carbamidomethyl)			#DIV/0!
	CPASCSSCSYDSSK	1	67478039	C1(Nitrosyl); C8(Nethylmaleimide)			#DIV/0!
	SNYYPK	4	67478039				15.1059
	LPSCER	4	67478039;67473255;449705993	C4(Carbamidomethyl)			26.0409
183233182	elongation factor 2 [Entamoeba histolytica HM-1:IMSS]	63.85	5	65	93.3411	6.27783	2.10499
	Sequence	# PSMs	Protein Group Accessions	Modifications			#VALUE!
	NPSDLPK	4	461997;183233182				4.06487
	INLEDVK	8	461997;183233182				1.53194
	TMLMMGR	15	461997;183233182				3.37389
	VGSIVAAIR	16	461997;183233182				2.51648
	FSVSPVVR	11	461997;183233182				2.80776
	LSADDKEK	8	461997;183233182				8.28357
	ETITEPSR	9	461997;183233182				2.96988
	AMANCDEK	4	461997;183233182	C5(Carbamidomethyl)			7.37763
	MLTNLQIK	12	461997;183233182				3.45193
	MLTNLQIK	13	461997;183233182	M1(Oxidation)			1.66218
	GDHGEVLQR	8	461997;183233182				2.89484
	VGSIVAAIRK	14	461997;183233182				4.6696
	VKPIVIINK	13	461997;183233182				3.3991
	AMANCDEK	4	461997;183233182	C5(Nethylmaleimide+water)			2.88708
	MIPTNDKGR	12	461997;183233182				3.68672
	MIPTNDKGR	8	461997;183233182	M1(Oxidation)			2.70883
	LFNAIMEGR	16	461997;183233182				1.97781
	GGAQMIPCAR	12	461997;183233182	C8(Carbamidomethyl)			2.65741
	GIQYLNEVK	6	461997;183233182				1.35243
	LFNAIMEGR	10	461997;183233182	M6(Oxidation)			1.71263
	GGAQMIPCAR	6	461997;183233182	M5(Oxidation); C8(Carbamidomethyl)			1.34116
	GLPEGVPGLDK	4	461997;183233182				1.45693
	ICGPNYVPGK	8	461997;183233182	C2(Carbamidomethyl)			2.65581
	YGWDVDEAR	12	461997;183233182				2.18404
	TMKDFMLNK	13	461997;183233182				4.43957
	TMKDFMLNK	5	461997;183233182	M6(Oxidation)			0
	GGAQMIPCAR	12	461997;183233182	C8(Nethylmaleimide+water)			1.99017
	GGAQMIPCAR	3	461997;183233182	M5(Oxidation); C8(Nethylmaleimide+water)			0
	LFNAIMEGRK	8	461997;183233182				0.93555
	ICGPNYVPGK	10	461997;183233182	C2(Nethylmaleimide+water)			2.32325
	KGLPEGVPGLDK	4	461997;183233182				1.71566
	LSADDKEKEGK	8	461997;183233182				8.77749
	ICGPNYVPGKK	10	461997;183233182	C2(Carbamidomethyl)			3.28373
	YGWDVDEARK	16	461997;183233182				2.76087
	LWGDNYWDAK	10	461997;183233182				3.60733
	NGKGDHGEVLQR	12	461997;183233182				3.31827
	NMCVIAHVDHGK	10	461997;183233182	C3(Carbamidomethyl)			4.68217
	VKPIVIINKVDR	28	461997;183233182				2.84561
	NMCVIAHVDHGK	4	461997;183233182	M2(Oxidation); C3(Carbamidomethyl)			0
	VAVETKNPSDLPK	16	461997;183233182				3.09068
	YTDTRPDEQER	12	461997;183233182				2.24476
	NMCVIAHVDHGK	2	461997;183233182	C3(Nethylmaleimide)			0
	GFVQFCFDPITK	8	461997;183233182	C6(Carbamidomethyl)			4.11506
	SGTITDSDTAHIIK	15	183233182				2.52242
	NMCVIAHVDHGK	10	461997;183233182	C3(Nethylmaleimide+water)			1.58451
	GFVQFCFDPITK	16	461997;183233182	C6(Nethylmaleimide)			4.12524
	EEPEEAYQSFCR	14	461997;183233182	C11(Carbamidomethyl)			1.16653
	GFVQFCFDPITK	22	461997;183233182	C6(Nethylmaleimide+water)			3.87163
	EEPEEAYQSFCR	10	461997;183233182	C11(Nethylmaleimide)			0
	TSNLYTGPMDDEAAK	6	461997;183233182				0.285604
	TSNLYTGPMDDEAAK	8	461997;183233182	M9(Oxidation)			0.181972
	EEPEEAYQSFCR	4	461997;183233182	C11(Nethylmaleimide+water)			0
	GLPEGVPGLDKFYDKL	18	461997;183233182				3.70677
	SGTITDSDTAHIIKDMK	10	183233182				4.30982
	SGTITDSDTAHIIKDMK	14	183233182	M16(Oxidation)			1.97877
	IISEEQRPGTPLFNVR	16	461997;183233182				1.64317
	STLTDSLVTLAGIISNEK	10	461997;183233182				31.5185
	AMANCDEKGPLMMYVSK	8	461997;183233182	C5(Carbamidomethyl)			3.75294
	ICGPNYVPGKKDDCVIK	5	461997;183233182	C2(Carbamidomethyl); C14(Carbamidomethyl)			2.98345
	GKIISEEQRPGTPLFNVR	4	461997;183233182				1.96363
	VILELKEEPEEAYQSFCR	22	461997;183233182	C17(Carbamidomethyl)			5.48682
	VILELKEEPEEAYQSFCR	20	461997;183233182	C17(Nethylmaleimide)			6.16664
	VILELKEEPEEAYQSFCR	12	461997;183233182	C17(Nethylmaleimide+water)			22.7653
	KIWCFGPDNCGPNLFVDVTK	8	461997;183233182	C4(Carbamidomethyl); C10(Carbamidomethyl)			14.0148
	DSIVNGFNNAMHDGVVCNEQIR	8	461997;183233182	C17(Carbamidomethyl)			2.30902
	DLQEDYCSGVPLIVTEPVVSFR	14	183233182	C7(Carbamidomethyl)			12.3967
	AFPFAEGLAEDIEAGEIKPDTDFK	4	183233182				9.34507
	AFPFAEGLAEDIEAGEIKPDTDFKER	46	183233182				24.0021
	ICGPNYVPGKKDDCVIK	1	461997;183233182	C2(Nethylmaleimide+water); C14(Carbamidomethyl)			0
	AMANCDEKGPLMMYVSK	1	461997;183233182	C5(Carbamidomethyl); M13(Oxidation)			0
	GLPEGVPGLDKFYDK	1	461997;183233182				0
	KDDCVIK	2	461997;183233182	C4(Carbamidomethyl)			#DIV/0!
	AYLPVCESFGFTADLR	2	461997;183233182	C6(Carbamidomethyl)			#DIV/0!
	KIWCFGPDNCGPNLFVDVTK	2	461997;183233182	C4(Carbamidomethyl); C10(Nethylmaleimide)			#DIV/0!
	KIWCFGPDNCGPNLFVDVTK	2	461997;183233182	C4(Nethylmaleimide+water); C10(Carbamidomethyl)			#DIV/0!
	DLQEDYCSGVPLIVTEPVVSFR	2	183233182	C7(Nethylmaleimide+water)			#DIV/0!
	YTDPIDECPCGNVIGLVGVDQYLLK	4	461997;183233182	C8(Carbamidomethyl); C10(Carbamidomethyl)			#DIV/0!
	YTDPIDECPCGNVIGLVGVDQYLLK	4	461997;183233182	C8(Nethylmaleimide); C10(Carbamidomethyl)			#DIV/0!
	YTDPIDECPCGNVIGLVGVDQYLLK	5	461997;183233182	C8(Nethylmaleimide+water); C10(Carbamidomethyl)			#DIV/0!
	YTDPIDECPCGNVIGLVGVDQYLLK	2	461997;183233182	C8(Nethylmaleimide); C10(Nethylmaleimide)			#DIV/0!
	SHTSGQAFPQCVFDHWQLLNGDVTDATSK	2	461997;183233182	C11(Carbamidomethyl)			#DIV/0!
	GIQYLNEVKDSIVNGFNNAMHDGVVCNEQIR	4	461997;183233182	C26(Carbamidomethyl)			#DIV/0!
	GGAQMIPCAR	1	461997;183233182	C8(Nethylmaleimide)			#DIV/0!
	VFSGTIR	4	461997;183233182				2.65929
	MIPTNDK	3	461997;183233182				3.68702
	TMLMMGR	8	461997;183233182	M2(Oxidation)			1.22693
	ICGPNYVPGK	4	461997;183233182	C2(Nethylmaleimide)			#DIV/0!
	ICGPNYVPGKK	3	461997;183233182	C2(Nethylmaleimide+water)			13.7765
	FYAFGR	11	461997;183233182				2.48206
	DDCVIK	3	461997;183233182	C3(Carbamidomethyl)			10.3063
	IQCLSK	5	461997;183233182	C3(Carbamidomethyl)			4.77303
	IQCLSK	7	461997;183233182	C3(Nethylmaleimide+water)			4.69578
	VILELK	7	461997;183233182				1.18573
	LVEGMK	4	461997;183233182				4.34576
	KADYEK	1	461997;183233182				#DIV/0!
	DDCVIK	1	461997;183233182	C3(Nethylmaleimide+water)			0
	QALTER	3	461997;183233182				7.24429
	AKFLSEK	2	461997;183233182				#DIV/0!
	DFMLNK	3	461997;183233182				2.29792
	DDCVIK	1	461997;183233182	C3(Nethylmaleimide)			0
	Sequence	# PSMs	Protein Group Accessions	Modifications			#VALUE!
	NPSDLPK	4	461997;183233182				4.06487
	INLEDVK	8	461997;183233182				1.53194
	TMLMMGR	15	461997;183233182				3.37389
	VGSIVAAIR	16	461997;183233182				2.51648
	FSVSPVVR	11	461997;183233182				2.80776
	LSADDKEK	8	461997;183233182				8.28357
	ETITEPSR	9	461997;183233182				2.96988
	AMANCDEK	4	461997;183233182	C5(Carbamidomethyl)			7.37763
	MLTNLQIK	12	461997;183233182				3.45193
	MLTNLQIK	13	461997;183233182	M1(Oxidation)			1.66218
	GDHGEVLQR	8	461997;183233182				2.89484
	VGSIVAAIRK	14	461997;183233182				4.6696
	VKPIVIINK	13	461997;183233182				3.3991
	AMANCDEK	4	461997;183233182	C5(Nethylmaleimide+water)			2.88708
	MIPTNDKGR	12	461997;183233182				3.68672
	MIPTNDKGR	8	461997;183233182	M1(Oxidation)			2.70883
	LFNAIMEGR	16	461997;183233182				1.97781
	GGAQMIPCAR	12	461997;183233182	C8(Carbamidomethyl)			2.65741
	GIQYLNEVK	6	461997;183233182				1.35243
	LFNAIMEGR	10	461997;183233182	M6(Oxidation)			1.71263
	GGAQMIPCAR	6	461997;183233182	M5(Oxidation); C8(Carbamidomethyl)			1.34116
	GLPEGVPGLDK	4	461997;183233182				1.45693
	ICGPNYVPGK	8	461997;183233182	C2(Carbamidomethyl)			2.65581
	YGWDVDEAR	12	461997;183233182				2.18404
	TMKDFMLNK	13	461997;183233182				4.43957
	TMKDFMLNK	5	461997;183233182	M6(Oxidation)			0
	GGAQMIPCAR	12	461997;183233182	C8(Nethylmaleimide+water)			1.99017
	GGAQMIPCAR	3	461997;183233182	M5(Oxidation); C8(Nethylmaleimide+water)			0
	LFNAIMEGRK	8	461997;183233182				0.93555
	ICGPNYVPGK	10	461997;183233182	C2(Nethylmaleimide+water)			2.32325
	KGLPEGVPGLDK	4	461997;183233182				1.71566
	LSADDKEKEGK	8	461997;183233182				8.77749
	ICGPNYVPGKK	10	461997;183233182	C2(Carbamidomethyl)			3.28373
	YGWDVDEARK	16	461997;183233182				2.76087
	LWGDNYWDAK	10	461997;183233182				3.60733
	NGKGDHGEVLQR	12	461997;183233182				3.31827
	NMCVIAHVDHGK	10	461997;183233182	C3(Carbamidomethyl)			4.68217
	VKPIVIINKVDR	28	461997;183233182				2.84561
	NMCVIAHVDHGK	4	461997;183233182	M2(Oxidation); C3(Carbamidomethyl)			0
	VAVETKNPSDLPK	16	461997;183233182				3.09068
	YTDTRPDEQER	12	461997;183233182				2.24476
	NMCVIAHVDHGK	2	461997;183233182	C3(Nethylmaleimide)			0
	GFVQFCFDPITK	8	461997;183233182	C6(Carbamidomethyl)			4.11506
	NMCVIAHVDHGK	10	461997;183233182	C3(Nethylmaleimide+water)			1.58451
	GFVQFCFDPITK	16	461997;183233182	C6(Nethylmaleimide)			4.12524
	EEPEEAYQSFCR	14	461997;183233182	C11(Carbamidomethyl)			1.16653
	GFVQFCFDPITK	22	461997;183233182	C6(Nethylmaleimide+water)			3.87163
	EEPEEAYQSFCR	10	461997;183233182	C11(Nethylmaleimide)			0
	TSNLYTGPMDDEAAK	6	461997;183233182				0.285604
	TSNLYTGPMDDEAAK	8	461997;183233182	M9(Oxidation)			0.181972
	EEPEEAYQSFCR	4	461997;183233182	C11(Nethylmaleimide+water)			0
	GLPEGVPGLDKFYDKL	18	461997;183233182				3.70677
	IISEEQRPGTPLFNVR	16	461997;183233182				1.64317
	STLTDSLVTLAGIISNEK	10	461997;183233182				31.5185
	AMANCDEKGPLMMYVSK	8	461997;183233182	C5(Carbamidomethyl)			3.75294
	ICGPNYVPGKKDDCVIK	5	461997;183233182	C2(Carbamidomethyl); C14(Carbamidomethyl)			2.98345
	GKIISEEQRPGTPLFNVR	4	461997;183233182				1.96363
	VILELKEEPEEAYQSFCR	22	461997;183233182	C17(Carbamidomethyl)			5.48682
	VILELKEEPEEAYQSFCR	20	461997;183233182	C17(Nethylmaleimide)			6.16664
	VILELKEEPEEAYQSFCR	12	461997;183233182	C17(Nethylmaleimide+water)			22.7653
	KIWCFGPDNCGPNLFVDVTK	8	461997;183233182	C4(Carbamidomethyl); C10(Carbamidomethyl)			14.0148
	DSIVNGFNNAMHDGVVCNEQIR	8	461997;183233182	C17(Carbamidomethyl)			2.30902
	ELQEDYCSGVPLIVTEPVVSFR	10	461997	C7(Carbamidomethyl)			5.7233
	ICGPNYVPGKKDDCVIK	1	461997;183233182	C2(Nethylmaleimide+water); C14(Carbamidomethyl)			0
	AMANCDEKGPLMMYVSK	1	461997;183233182	C5(Carbamidomethyl); M13(Oxidation)			0
	GLPEGVPGLDKFYDK	1	461997;183233182				0
	KDDCVIK	2	461997;183233182	C4(Carbamidomethyl)			#DIV/0!
	AYLPVCESFGFTADLR	2	461997;183233182	C6(Carbamidomethyl)			#DIV/0!
	KIWCFGPDNCGPNLFVDVTK	2	461997;183233182	C4(Carbamidomethyl); C10(Nethylmaleimide)			#DIV/0!
	KIWCFGPDNCGPNLFVDVTK	2	461997;183233182	C4(Nethylmaleimide+water); C10(Carbamidomethyl)			#DIV/0!
	YTDPIDECPCGNVIGLVGVDQYLLK	4	461997;183233182	C8(Carbamidomethyl); C10(Carbamidomethyl)			#DIV/0!
	YTDPIDECPCGNVIGLVGVDQYLLK	4	461997;183233182	C8(Nethylmaleimide); C10(Carbamidomethyl)			#DIV/0!
	YTDPIDECPCGNVIGLVGVDQYLLK	5	461997;183233182	C8(Nethylmaleimide+water); C10(Carbamidomethyl)			#DIV/0!
	YTDPIDECPCGNVIGLVGVDQYLLK	2	461997;183233182	C8(Nethylmaleimide); C10(Nethylmaleimide)			#DIV/0!
	SHTSGQAFPQCVFDHWQLLNGDVTDATSK	2	461997;183233182	C11(Carbamidomethyl)			#DIV/0!
	GIQYLNEVKDSIVNGFNNAMHDGVVCNEQIR	4	461997;183233182	C26(Carbamidomethyl)			#DIV/0!
	GGAQMIPCAR	1	461997;183233182	C8(Nethylmaleimide)			#DIV/0!
	VFSGTIR	4	461997;183233182				2.65929
	MIPTNDK	3	461997;183233182				3.68702
	TMLMMGR	8	461997;183233182	M2(Oxidation)			1.22693
	ICGPNYVPGK	4	461997;183233182	C2(Nethylmaleimide)			#DIV/0!
	ICGPNYVPGKK	3	461997;183233182	C2(Nethylmaleimide+water)			13.7765
	FYAFGR	11	461997;183233182				2.48206
	DDCVIK	3	461997;183233182	C3(Carbamidomethyl)			10.3063
	IQCLSK	5	461997;183233182	C3(Carbamidomethyl)			4.77303
	IQCLSK	7	461997;183233182	C3(Nethylmaleimide+water)			4.69578
	VILELK	7	461997;183233182				1.18573
	LVEGMK	4	461997;183233182				4.34576
	KADYEK	1	461997;183233182				#DIV/0!
	DDCVIK	1	461997;183233182	C3(Nethylmaleimide+water)			0
	QALTER	3	461997;183233182				7.24429
	AKFLSEK	2	461997;183233182				#DIV/0!
	DFMLNK	3	461997;183233182				2.29792
	DDCVIK	1	461997;183233182	C3(Nethylmaleimide)			0
67481663	Gal/GalNAc lectin heavy subunit [Entamoeba histolytica HM-1:IMSS]	49.53	0	61	144.233	5.31299	11.9518
	Sequence	# PSMs	Protein Group Accessions	Modifications			#VALUE!
	KAFIEGK	4	67481663;183235851;158959;290649;159798030				13.6898
	MDFIGGR	11	67481663;158959;183235851;290649;20454163;449709712;472459784;472459785				25.4947
	SNIDPKPR	4	67481663;158959				#DIV/0!
	EYAYPIEK	12	67481663;158959;183235851;290649;20454163;449709712;472459784				12.1118
	TEAYDVCR	6	67481663;158959;183235851;290649;20454163;449709712;472459784	C7(Carbamidomethyl)			47.629
	DLEGCVVTK	4	67481663;158959;20454171	C5(Carbamidomethyl)			5.25199
	IQEIVITEK	4	67481663;159798030;183235851;158959;22476954;290649				4.24334
	GDSYATDNIK	9	67481663;449709712				29.3635
	DLKYETLVK	9	67481663;158959;449709712				37.2971
	SGVELNNACLK	6	67481663;159798030;183235851;158959;290649	C9(Carbamidomethyl)			8.94128
	CSGFCDAMNR	2	67481663;183235851;158959;20454163;290649;449709712;472459785	C1(Carbamidomethyl); C5(Carbamidomethyl)			#DIV/0!
	DCVNEQCIPR	10	67481663;159798030;183235851;158959;22476954;290649	C2(Carbamidomethyl); C7(Carbamidomethyl)			6.80954
	NLDKQDFCQK	10	67481663;158959	C8(Carbamidomethyl)			43.4391
	RPLAYVYLNTK	16	67481663;158959;183235851;290649;449709712;472459784				35.1307
	CNLNTGMCENR	4	67481663;183235851;158959;20454171;20454169;290649	C1(Carbamidomethyl); C8(Carbamidomethyl)			6.24482
	CNLNTGMCENR	4	67481663;183235851;158959;20454171;20454169;290649	C1(Carbamidomethyl); M7(Oxidation); C8(Carbamidomethyl)			4.09554
	CIVSECTEDLVR	4	67481663;158959	C1(Carbamidomethyl); C6(Carbamidomethyl)			3.08703
	IQEIVITEKDGIK	10	67481663;159798030;183235851;158959;22476954;290649				14.7993
	TSPYIEMSCYVAK	8	67481663;183235851;158959;20454171;20454169;290649	C9(Carbamidomethyl)			2.96949
	ATVKPTPSCSVCEK	6	67481663;158959	C9(Carbamidomethyl); C12(Carbamidomethyl)			7.69299
	TSPYIEMSCYVAK	2	67481663;183235851;158959;20454171;20454169;290649	M7(Oxidation); C9(Carbamidomethyl)			#DIV/0!
	AMTGECDGTTYLCK	8	67481663;159798030;183235851;158959;290649	C6(Carbamidomethyl); C13(Carbamidomethyl)			11.6316
	TTYWENVDCSNTK	6	67481663;158959;20454169	C9(Carbamidomethyl)			4.7463
	AMTGECDGTTYLCK	4	67481663;159798030;183235851;158959;290649	M2(Oxidation); C6(Carbamidomethyl); C13(Carbamidomethyl)			10.6248
	YTAGQGQVDPLVNIAK	14	67481663;449709712				16.4357
	FVQLTDDPSLDSEHFR	10	67481663;183235851;158959;290649				5.25328
	TCTVSEEFPTITPNQGR	10	67481663;159798030;183235851;158959;290649	C2(Carbamidomethyl)			7.59512
	YIINEDHNLNAQQLNNIK	10	67481663;158959				16.4601
	NPCETATCDQTTGETIYTKK	6	67481663;158959	C3(Carbamidomethyl); C8(Carbamidomethyl)			10.409
	ITHKWEIDTER	9	67481663;183235851;158959;290649				19.2376
	KVTLEDGKEYQYNIPK	3	67481663;158959				4.86926
	NAITTTNENAEYVGADNEATNAATYNG	3	67481663;158959				0.283684
	NGGVPFK	4	67481663;159798030;183235851;158959;22476954;290649				#DIV/0!
	MDFIGGR	2	67481663;158959;183235851;290649;20454163;449709712;472459784;472459785	M1(Oxidation)			#DIV/0!
	CIIDVHK	2	67481663;158959;449709712	C1(Carbamidomethyl)			#DIV/0!
	IEFAQDGK	2	67481663;158959				#DIV/0!
	TCSLTETK	2	67481663;158959	C2(Carbamidomethyl)			#DIV/0!
	EYQYNIPK	2	67481663;158959				#DIV/0!
	TYQLVSSAMK	2	67481663;183235851;158959;290649	M9(Oxidation)			#DIV/0!
	LKDLKYETLVK	4	67481663;158959;449709712				#DIV/0!
	HFVWTTCETTK	4	67481663;158959	C7(Carbamidomethyl)			#DIV/0!
	CNQNTEVDYGCK	2	67481663;159798030;183235851;158959;290649	C1(Carbamidomethyl); C11(Carbamidomethyl)			#DIV/0!
	EKVEEIDLCAEETK	2	67481663;158959	C9(Carbamidomethyl)			#DIV/0!
	TTNCQEYVCDSEQR	4	67481663;158959	C4(Carbamidomethyl); C9(Carbamidomethyl)			#DIV/0!
	VTLEDGKEYQYNIPK	2	67481663;158959				#DIV/0!
	TYVDCLANDDNFGEIYK	4	67481663;158959	C5(Carbamidomethyl)			#DIV/0!
	LSCDTYSSCGGDSTGSVCK	2	67481663;183235851;158959;20454171;20454169;290649	C3(Carbamidomethyl); C9(Carbamidomethyl); C18(Carbamidomethyl)			#DIV/0!
	KTCTVSEEFPTITPNQGR	4	67481663;159798030;183235851;158959;290649	C3(Carbamidomethyl)			#DIV/0!
	NNVNTHLAIILGITDSTVIK	2	67481663;158959;449709712				#DIV/0!
	NPCETATCDQTTGETIYTK	4	67481663;158959	C3(Carbamidomethyl); C8(Carbamidomethyl)			#DIV/0!
	NPCETATCDQTTGETIYTK	2	67481663;158959	C8(Nethylmaleimide+water)			#DIV/0!
	NNNCIIDPNFDCQPIECK	2	67481663;183235851;158959;22476954;290649	C4(Carbamidomethyl); C12(Carbamidomethyl); C17(Carbamidomethyl)			#DIV/0!
	SDNDICAECSSLTCPADTTYR	2	67481663;158959;22476954	C9(Nethylmaleimide+water); C14(Carbamidomethyl)			#DIV/0!
	YEVDWDNVPVDEQQIESVDINGK	6	67481663;158959				#DIV/0!
	LVSLGPHYHEFTSNSEVSTTIDELFK	6	67481663;158959;449709712				#DIV/0!
	EYAYPIEKYEVDWDNVPVDEQQIESVDINGK	2	67481663;158959				#DIV/0!
	DGCLIK	5	67481663;159798030;183235851;158959;20454171;20454169;22476954;290649	C3(Carbamidomethyl)			7.68094
	ITYSALK	6	67481663;158959;449709712				4.74421
	LHLPQSEEFMK	6	67481663;159798030;158959;22476954;290649				2.20662
	DGCLIKR	1	67481663;159798030;183235851;158959;20454171;20454169;22476954;290649	C3(Carbamidomethyl)			#DIV/0!
	MTYATK	3	67481663;158959;183235851;290649;449709712;472459784				71.7349
	AFIEGK	3	159798030;67481663;183235851;158959;290649				12.2434
	MTYATK	2	67481663;158959;183235851;290649;449709712;472459784	M1(Oxidation)			#DIV/0!
	CKDQKLER	2	67481663;159798030;183235851;22476954;290649	C1(Carbamidomethyl)			#DIV/0!
	YETLVK	2	67481663;158959;449709712				#DIV/0!
	NDLFK	1	67481663;158959;449709712				#DIV/0!
	GNKECYK	1	67481663;158959	C5(Carbamidomethyl)			#DIV/0!
158959	<no link>, partial [Entamoeba histolytica]	48.13	1	59	143.718	5.31299	11.7416
	Sequence	# PSMs	Protein Group Accessions	Modifications			#VALUE!
	KAFIEGK	4	67481663;183235851;158959;290649;159798030				13.6898
	MDFIGGR	11	67481663;158959;183235851;290649;20454163;449709712;472459784;472459785				25.4947
	SNIDPKPR	4	67481663;158959				#DIV/0!
	EYAYPIEK	12	67481663;158959;183235851;290649;20454163;449709712;472459784				12.1118
	TEAYDVCR	6	67481663;158959;183235851;290649;20454163;449709712;472459784	C7(Carbamidomethyl)			47.629
	DLEGCVVTK	4	67481663;158959;20454171	C5(Carbamidomethyl)			5.25199
	IQEIVITEK	4	67481663;159798030;183235851;158959;22476954;290649				4.24334
	DLKYETLVK	9	67481663;158959;449709712				37.2971
	SGVELNNACLK	6	67481663;159798030;183235851;158959;290649	C9(Carbamidomethyl)			8.94128
	CSGFCDAMNR	2	67481663;183235851;158959;20454163;290649;449709712;472459785	C1(Carbamidomethyl); C5(Carbamidomethyl)			#DIV/0!
	DCVNEQCIPR	10	67481663;159798030;183235851;158959;22476954;290649	C2(Carbamidomethyl); C7(Carbamidomethyl)			6.80954
	NLDKQDFCQK	10	67481663;158959	C8(Carbamidomethyl)			43.4391
	RPLAYVYLNTK	16	67481663;158959;183235851;290649;449709712;472459784				35.1307
	CNLNTGMCENR	4	67481663;183235851;158959;20454171;20454169;290649	C1(Carbamidomethyl); C8(Carbamidomethyl)			6.24482
	CNLNTGMCENR	4	67481663;183235851;158959;20454171;20454169;290649	C1(Carbamidomethyl); M7(Oxidation); C8(Carbamidomethyl)			4.09554
	SLQENLSLLSQLK	10	158959				44.5126
	CIVSECTEDLVR	4	67481663;158959	C1(Carbamidomethyl); C6(Carbamidomethyl)			3.08703
	IQEIVITEKDGIK	10	67481663;159798030;183235851;158959;22476954;290649				14.7993
	TSPYIEMSCYVAK	8	67481663;183235851;158959;20454171;20454169;290649	C9(Carbamidomethyl)			2.96949
	ATVKPTPSCSVCEK	6	67481663;158959	C9(Carbamidomethyl); C12(Carbamidomethyl)			7.69299
	TSPYIEMSCYVAK	2	67481663;183235851;158959;20454171;20454169;290649	M7(Oxidation); C9(Carbamidomethyl)			#DIV/0!
	AMTGECDGTTYLCK	8	67481663;159798030;183235851;158959;290649	C6(Carbamidomethyl); C13(Carbamidomethyl)			11.6316
	TTYWENVDCSNTK	6	67481663;158959;20454169	C9(Carbamidomethyl)			4.7463
	AMTGECDGTTYLCK	4	67481663;159798030;183235851;158959;290649	M2(Oxidation); C6(Carbamidomethyl); C13(Carbamidomethyl)			10.6248
	FVQLTDDPSLDSEHFR	10	67481663;183235851;158959;290649				5.25328
	TCTVSEEFPTITPNQGR	10	67481663;159798030;183235851;158959;290649	C2(Carbamidomethyl)			7.59512
	YIINEDHNLNAQQLNNIK	10	67481663;158959				16.4601
	NPCETATCDQTTGETIYTKK	6	67481663;158959	C3(Carbamidomethyl); C8(Carbamidomethyl)			10.409
	ITHKWEIDTER	9	67481663;183235851;158959;290649				19.2376
	KVTLEDGKEYQYNIPK	3	67481663;158959				4.86926
	NAITTTNENAEYVGADNEATNAATYNG	3	67481663;158959				0.283684
	NGGVPFK	4	67481663;159798030;183235851;158959;22476954;290649				#DIV/0!
	MDFIGGR	2	67481663;158959;183235851;290649;20454163;449709712;472459784;472459785	M1(Oxidation)			#DIV/0!
	CIIDVHK	2	67481663;158959;449709712	C1(Carbamidomethyl)			#DIV/0!
	IEFAQDGK	2	67481663;158959				#DIV/0!
	TCSLTETK	2	67481663;158959	C2(Carbamidomethyl)			#DIV/0!
	EYQYNIPK	2	67481663;158959				#DIV/0!
	TYQLVSSAMK	2	67481663;183235851;158959;290649	M9(Oxidation)			#DIV/0!
	LKDLKYETLVK	4	67481663;158959;449709712				#DIV/0!
	HFVWTTCETTK	4	67481663;158959	C7(Carbamidomethyl)			#DIV/0!
	CNQNTEVDYGCK	2	67481663;159798030;183235851;158959;290649	C1(Carbamidomethyl); C11(Carbamidomethyl)			#DIV/0!
	EKVEEIDLCAEETK	2	67481663;158959	C9(Carbamidomethyl)			#DIV/0!
	TTNCQEYVCDSEQR	4	67481663;158959	C4(Carbamidomethyl); C9(Carbamidomethyl)			#DIV/0!
	VTLEDGKEYQYNIPK	2	67481663;158959				#DIV/0!
	TYVDCLANDDNFGEIYK	4	67481663;158959	C5(Carbamidomethyl)			#DIV/0!
	LSCDTYSSCGGDSTGSVCK	2	67481663;183235851;158959;20454171;20454169;290649	C3(Carbamidomethyl); C9(Carbamidomethyl); C18(Carbamidomethyl)			#DIV/0!
	KTCTVSEEFPTITPNQGR	4	67481663;159798030;183235851;158959;290649	C3(Carbamidomethyl)			#DIV/0!
	NNVNTHLAIILGITDSTVIK	2	67481663;158959;449709712				#DIV/0!
	NPCETATCDQTTGETIYTK	4	67481663;158959	C3(Carbamidomethyl); C8(Carbamidomethyl)			#DIV/0!
	NPCETATCDQTTGETIYTK	2	67481663;158959	C8(Nethylmaleimide+water)			#DIV/0!
	NNNCIIDPNFDCQPIECK	2	67481663;183235851;158959;22476954;290649	C4(Carbamidomethyl); C12(Carbamidomethyl); C17(Carbamidomethyl)			#DIV/0!
	SDNDICAECSSLTCPADTTYR	2	67481663;158959;22476954	C9(Nethylmaleimide+water); C14(Carbamidomethyl)			#DIV/0!
	YEVDWDNVPVDEQQIESVDINGK	6	67481663;158959				#DIV/0!
	LVSLGPHYHEFTSNSEVSTTIDELFK	6	67481663;158959;449709712				#DIV/0!
	EYAYPIEKYEVDWDNVPVDEQQIESVDINGK	2	67481663;158959				#DIV/0!
	DGCLIK	5	67481663;159798030;183235851;158959;20454171;20454169;22476954;290649	C3(Carbamidomethyl)			7.68094
	ITYSALK	6	67481663;158959;449709712				4.74421
	LHLPQSEEFMK	6	67481663;159798030;158959;22476954;290649				2.20662
	DGCLIKR	1	67481663;159798030;183235851;158959;20454171;20454169;22476954;290649	C3(Carbamidomethyl)			#DIV/0!
	MTYATK	3	67481663;158959;183235851;290649;449709712;472459784				71.7349
	AFIEGK	3	159798030;67481663;183235851;158959;290649				12.2434
	MTYATK	2	67481663;158959;183235851;290649;449709712;472459784	M1(Oxidation)			#DIV/0!
	YETLVK	2	67481663;158959;449709712				#DIV/0!
	NDLFK	1	67481663;158959;449709712				#DIV/0!
	GNKECYK	1	67481663;158959	C5(Carbamidomethyl)			#DIV/0!
	Sequence	# PSMs	Protein Group Accessions	Modifications			#VALUE!
	VEVAYEDK	6	472462606;1695889				2.24154
	RGQVQADGK	3	472462606;1695889				11.3446
	VGTSVPVTGAK	4	1695889				2.0609
	FTIHCVNK	10	472462606;1695889	C5(Carbamidomethyl)			2.12674
	GEYHINCK	5	472462606;1695889	C7(Carbamidomethyl)			13.3367
	HYEAEKEK	4	472462606;1695889				12.7867
	IQGVTPEGKK	9	472462606;1695889				2.17714
	NALLEWVNSK	12	472462606;1695889				1.66358
	FTVELDGPNGK	2	472462606;1695889				0
	HKVEVAYEDK	12	472462606;1695889				1.67354
	VPGIYDVQVLLK	8	472462606;1695889				2.42064
	LENTEQALNFIK	12	472462606;1695889				1.23375
	NPENPEEFKDIK	8	472462606;1695889				0.305124
	AKVPGIYDVQVLLK	6	472462606;1695889				8.78934
	AKEEGAEEPKEEEK	6	472462606;1695889				2.02061
	GSVYHPEIKDGVDAK	6	472462606;1695889				1.31342
	TGEVLVPQEFTVTAK	4	472462606;1695889				0
	GGDEFKVEITDPEGK	4	472462606;1695889				0.262634
	KEEGAEEPKEEIEGK	2	472462606;1695889				0
	GGDEFKVEITDPEGKK	6	472462606;1695889				1.58332
	YSLPAEKGEYHINCK	6	472462606;1695889	C14(Carbamidomethyl)			1.50976
	YSLPAEKGEYHINCK	2	472462606;1695889	C14(Nethylmaleimide)			0
	DNGDGTYDMTYVPQVPGK	2	472462606;1695889				0
	VPGIYDVQVLLKNPENPEEFK	2	472462606;1695889				0
	GEDVPVGGHPFQVIIDQVTESEK	12	472462606;1695889				2.43936
	QQGSIPCTVIDNENGTYDVHYR	2	472462606;1695889	C7(Carbamidomethyl)			0
	VPGIYDVQVLLKNPENPEEFKDIK	6	472462606;1695889				4.67608
	CVVDGEGIERPNDQEDNVFTIHAK	4	472462606;1695889	C1(Nethylmaleimide)			1.03407
	QSPAIVMIEPAQADPENTYADGEGVEK	2	472462606;1695889				0
	NFKGEDVPVGGHPFQVIIDQVTESEK	20	472462606;1695889				0.209405
	KCVVDGEGIERPNDQEDNVFTIHAK	2	472462606;1695889	C2(Carbamidomethyl)			0
	NFKGEDVPVGGHPFQVIIDQVTESEKK	5	472462606;1695889				4.3901
	GDQITQGGVTWNAHVFDPEGNEIPIEQK	2	472462606;1695889				0
	TPDPSKCVMSGPGLK	2	472462606;1695889	C7(Nethylmaleimide+water)			0
	GQVQADGK	2	472462606;1695889				#DIV/0!
	CVMSGPGLK	3	472462606;1695889	C1(Carbamidomethyl)			#DIV/0!
	CVMSGPGLK	2	472462606;1695889	C1(Carbamidomethyl); M3(Oxidation)			#DIV/0!
	VAKLENTEQALNFIK	3	472462606;1695889				#DIV/0!
	GSVYHPEIKDGVDAKK	3	472462606;1695889				#DIV/0!
	FTVELDGPNGKLEEQK	2	472462606;1695889				#DIV/0!
	CVVDGEGIERPNDQEDNVFTIHAK	2	472462606;1695889	C1(Carbamidomethyl)			#DIV/0!
	QSPAIVMIEPAQADPENTYADGEGVEK	2	472462606;1695889	M7(Oxidation)			#DIV/0!
	HYEAEK	6	472462606;1695889				8.42106
	YQIAQNK	6	472462606;1695889				3.78656
	IQGVTPEGK	2	472462606;1695889				0
	AKEEGAEEPK	1	472462606;1695889				#DIV/0!
	EAELMR	4	472462606;1695889				2.87146
	LGEAER	3	472462606;1695889				3.96257
	EAELMR	2	472462606;1695889	M5(Oxidation)			0
	GNPYQCK	1	472462606;1695889	C6(Nethylmaleimide+water)			0
	GNPYQCK	2	472462606;1695889	C6(Carbamidomethyl)			0
	QKVQFR	2	472462606;1695889				#DIV/0!
	VKIELNK	2	472462606;1695889				#DIV/0!
	FTIHCVNK	1	472462606;1695889	C5(Nethylmaleimide+water)			#DIV/0!
	GSVYHPEIK	1	472462606;1695889				#DIV/0!
183232524	adenylyl cyclase-associated protein [Entamoeba histolytica HM-1:IMSS]	77.41	47	47	53.1822	6.69775	3.26362
	Sequence	# PSMs	Protein Group Accessions	Modifications			#VALUE!
	LETVTAR	8	183232524				6.52368
	HVTADMK	4	183232524				7.80213
	GTAISGGLK	4	183232524				5.53176
	EMVVYIK	2	183232524				0
	SVVQKPPK	4	183232524				4.24932
	SSYYFPK	8	183232524				2.77936
	EEPKPVVK	4	183232524				2.89412
	MMAVGEYK	5	183232524	M2(Oxidation)			4.27273
	MIQPISEK	4	183232524				4.64382
	MIQPISEK	6	183232524	M1(Oxidation)			4.69044
	TLLAQVMNR	8	183232524				2.69313
	TLLAQVMNR	14	183232524	M7(Oxidation)			2.58182
	LEGNTTNSTK	4	183232524				14.4223
	INCISVDGCK	6	183232524	C3(Carbamidomethyl); C9(Carbamidomethyl)			2.98105
	YDWALNFIK	8	183232524				8.31923
	ALDGNTTVNTSK	14	183232524				4.07895
	GGVASAQAAPVAPK	10	183232524				4.0744
	SQSVNVHLSEK	10	183232524				2.99458
	VTTNTPKPATAK	4	183232524				9.14049
	SVVQKPPKIEK	9	183232524				4.68857
	INCISVDGCKK	4	183232524	C3(Carbamidomethyl); C9(Carbamidomethyl)			0
	LYPQIYFHDK	18	183232524				2.03818
	VIELTPTVNIDK	10	183232524				2.06934
	SQKPTQEEFQK	16	183232524				4.72712
	KVTTNTPKPATAK	4	183232524				5.04308
	LEKLEGNTTNSTK	12	183232524				7.49103
	QYHTTGLTWNPK	6	183232524				5.92569
	VETPKEEPKPVVK	15	183232524				4.53623
	NMKPEDKVPLEPK	6	183232524				0.370723
	SSTSNSTCECGDVPK	8	183232524	C8(Carbamidomethyl); C10(Carbamidomethyl)			11.4296
	QQQPNPAGLFAELNK	22	183232524				2.50209
	EQNKYDWALNFIK	8	183232524				6.64412
	ENKLYPQIYFHDK	10	183232524				3.73436
	NLNKWDISYHNGNK	4	183232524				2.70465
	EDEVEYPIPEQIYTIVK	4	183232524				0
	TPAPYVADLIPGSEFYTNK	27	183232524				5.25885
	QQQPNPAGLFAELNKGTAISGGLK	10	183232524				4.12813
	ELIEEYLKPQVEAAQGFDEILGK	18	183232524				120.249
	NMKPEDK	2	183232524				#DIV/0!
	MMAVGEYK	4	183232524				#DIV/0!
	MMAVGEYKDK	4	183232524				#DIV/0!
	MMAVGEYKDK	6	183232524	M1(Oxidation)			#DIV/0!
	INCISVDGCK	6	183232524	C3(Nethylmaleimide+water); C9(Carbamidomethyl)			#DIV/0!
	FLKEMVVYIK	4	183232524				#DIV/0!
	SSTSNSTCECGDVPK	5	183232524	C8(Carbamidomethyl); C10(Nethylmaleimide+water)			#DIV/0!
	TLLAQVMNRLETVTAR	2	183232524				#DIV/0!
	TLLAQVMNRLETVTAR	4	183232524	M7(Oxidation)			#DIV/0!
	GKEQNKYDWALNFIK	2	183232524				#DIV/0!
	VIELTPTVNIDKSQSVNVHLSEK	2	183232524				#DIV/0!
	CDAVNISFPNPEDKEDEVEYPIPEQIYTIVK	4	183232524	C1(Carbamidomethyl)			#DIV/0!
	HVTADMK	3	183232524	M6(Oxidation)			12.4308
	NMKPEDKVPLEPKK	1	183232524	M2(Oxidation)			#DIV/0!
	AVQAFK	6	183232524				9.78017
	NMKPEDKVPLEPK	2	183232524	M2(Oxidation)			3.09993
	EMVVYIK	1	183232524	M2(Oxidation)			#DIV/0!
	VPLEPK	2	183232524				#DIV/0!
	VLVATK	1	183232524				0
290649	galactose-specific adhesin 170kD subunit [Entamoeba histolytica]	34.52	1	46	145.082	5.5415	15.5814
	Sequence	# PSMs	Protein Group Accessions	Modifications			#VALUE!
	KAFIEGK	4	67481663;183235851;158959;290649;159798030				13.6898
	MDFIGGR	11	67481663;158959;183235851;290649;20454163;449709712;472459784;472459785				25.4947
	SFNTENK	4	290649;20454163;472459785				41.8315
	EYAYPIEK	12	67481663;158959;183235851;290649;20454163;449709712;472459784				12.1118
	TEAYDVCR	6	67481663;158959;183235851;290649;20454163;449709712;472459784	C7(Carbamidomethyl)			47.629
	IQEIVITEK	4	67481663;159798030;183235851;158959;22476954;290649				4.24334
	SGVELNNACLK	6	67481663;159798030;183235851;158959;290649	C9(Carbamidomethyl)			8.94128
	CSGFCDAMNR	2	67481663;183235851;158959;20454163;290649;449709712;472459785	C1(Carbamidomethyl); C5(Carbamidomethyl)			#DIV/0!
	SLQENLSLLNK	6	183235851;20454163;290649;472459785				10.0029
	DCVNEQCIPR	10	67481663;159798030;183235851;158959;22476954;290649	C2(Carbamidomethyl); C7(Carbamidomethyl)			6.80954
	RPLAYVYLNTK	16	67481663;158959;183235851;290649;449709712;472459784				35.1307
	CNLNTGMCENR	4	67481663;183235851;158959;20454171;20454169;290649	C1(Carbamidomethyl); C8(Carbamidomethyl)			6.24482
	CNLNTGMCENR	4	67481663;183235851;158959;20454171;20454169;290649	C1(Carbamidomethyl); M7(Oxidation); C8(Carbamidomethyl)			4.09554
	TTYWENVDCSK	2	183235851;20454171;22476954;290649	C9(Carbamidomethyl)			0
	IQEIVITEKDGIK	10	67481663;159798030;183235851;158959;22476954;290649				14.7993
	TSPYIEMSCYVAK	8	67481663;183235851;158959;20454171;20454169;290649	C9(Carbamidomethyl)			2.96949
	TSPYIEMSCYVAK	2	67481663;183235851;158959;20454171;20454169;290649	M7(Oxidation); C9(Carbamidomethyl)			#DIV/0!
	TYIDCLGNDDNFK	6	159798030;22476954;290649	C5(Carbamidomethyl)			6.25432
	AMTGECDGTTYLCK	8	67481663;159798030;183235851;158959;290649	C6(Carbamidomethyl); C13(Carbamidomethyl)			11.6316
	AMTGECDGTTYLCK	4	67481663;159798030;183235851;158959;290649	M2(Oxidation); C6(Carbamidomethyl); C13(Carbamidomethyl)			10.6248
	EKVQEVDLCAEETK	2	183235851;22476954;290649	C9(Carbamidomethyl)			0
	ATVQPTPACSVCESGK	4	183235851;290649	C9(Carbamidomethyl); C12(Carbamidomethyl)			5.34987
	YEVDWDNVPVDEQR	6	183235851;290649;20454163;449709712;472459784				9.00515
	FVQLTDDPSLDSEHFR	10	67481663;183235851;158959;290649				5.25328
	TCTVSEEFPTITPNQGR	10	67481663;159798030;183235851;158959;290649	C2(Carbamidomethyl)			7.59512
	NPCETATCNQTTGETIYTKK	5	159798030;183235851;290649	C3(Nethylmaleimide+water)			6.43486
	ITHKWEIDTER	9	67481663;183235851;158959;290649				19.2376
	NGGVPFK	4	67481663;159798030;183235851;158959;22476954;290649				#DIV/0!
	MDFIGGR	2	67481663;158959;183235851;290649;20454163;449709712;472459784;472459785	M1(Oxidation)			#DIV/0!
	IESVDINGK	4	183235851;290649;20454163;449709712;472459784				#DIV/0!
	TYQLVSSAMK	2	67481663;183235851;158959;290649	M9(Oxidation)			#DIV/0!
	CNQNTEVDYGCK	2	67481663;159798030;183235851;158959;290649	C1(Carbamidomethyl); C11(Carbamidomethyl)			#DIV/0!
	TNNCQEYVCDEK	2	20454171;20454169;290649	C4(Carbamidomethyl); C9(Carbamidomethyl)			#DIV/0!
	LSCDTYSSCGGDSTGSVCK	2	67481663;183235851;158959;20454171;20454169;290649	C3(Carbamidomethyl); C9(Carbamidomethyl); C18(Carbamidomethyl)			#DIV/0!
	KTCTVSEEFPTITPNQGR	4	67481663;159798030;183235851;158959;290649	C3(Carbamidomethyl)			#DIV/0!
	NPCETATCNQTTGETIYTK	2	159798030;183235851;290649	C8(Nethylmaleimide+water)			#DIV/0!
	HFVWTTCTTTDGNKECYK	4	290649	C7(Carbamidomethyl); C16(Carbamidomethyl)			#DIV/0!
	NNNCIIDPNFDCQPIECK	2	67481663;183235851;158959;22476954;290649	C4(Carbamidomethyl); C12(Carbamidomethyl); C17(Carbamidomethyl)			#DIV/0!
	YEVDWDNVPVDEQRIESVDINGK	2	183235851;290649;20454163;449709712;472459784				#DIV/0!
	EYAYPIEKYEVDWDNVPVDEQR	4	183235851;290649;20454163;449709712;472459784				#DIV/0!
	DGCLIK	5	67481663;159798030;183235851;158959;20454171;20454169;22476954;290649	C3(Carbamidomethyl)			7.68094
	LHLPQSEEFMK	6	67481663;159798030;158959;22476954;290649				2.20662
	YTINEDHNVK	3	183235851;290649;449709712;472459784				4.60834
	DGCLIKR	1	67481663;159798030;183235851;158959;20454171;20454169;22476954;290649	C3(Carbamidomethyl)			#DIV/0!
	SNANPKPR	2	159798030;183235851;290649				#DIV/0!
	DLEGCVVK	2	183235851;20454169;290649	C5(Carbamidomethyl)			#DIV/0!
	MTYATK	3	67481663;158959;183235851;290649;449709712;472459784				71.7349
	AFIEGK	3	159798030;67481663;183235851;158959;290649				12.2434
	MTYATK	2	67481663;158959;183235851;290649;449709712;472459784	M1(Oxidation)			#DIV/0!
	CKDQKLER	2	67481663;159798030;183235851;22476954;290649	C1(Carbamidomethyl)			#DIV/0!
	TDIKQDFCQK	1	290649;472459784	C8(Carbamidomethyl)			#DIV/0!
	Sequence	# PSMs	Protein Group Accessions	Modifications			#VALUE!
	TIVDPNAK	5	67479719				64.3171
	KSIESEEK	4	67479719				78.6001
	THVIMNYK	13	67479719				55.4124
	NLIVQYNLK	6	67479719				39.8116
	DKWIDSTSSGK	8	67479719				174.511
	LDEEFSNKDK	8	67479719				272.562
	FEQGIDCGGGYIK	16	67479719	C7(Carbamidomethyl)			43.4398
	GLQTSEDNKFYIAAAK	24	67479719				288.871
	EIDDPNVSKPADWVDEK	10	67479719				29.938
	MRDEIKEAEK	6	67479719				114.588
	DEIKEAEK	2	67479719				#DIV/0!
	WYGDANNK	2	67479719				#DIV/0!
	WIDSTSSGK	2	67479719				#DIV/0!
	LDEEFSNK	2	67479719				#DIV/0!
	THVIMNYK	2	67479719	M5(Oxidation)			#DIV/0!
	IDGVEKQEGK	2	67479719				#DIV/0!
	RTHVIMNYK	2	67479719				#DIV/0!
	VYFHETFENR	2	67479719				#DIV/0!
	DKNLIVQYNLK	4	67479719				#DIV/0!
	FDEDWDMLAPK	4	67479719				#DIV/0!
	QEGKFDEDWDMLAPK	10	67479719				#DIV/0!
	QEGKFDEDWDMLAPK	2	67479719	M11(Oxidation)			#DIV/0!
	EIDDPNDKKPEGWDDIPK	4	67479719				#DIV/0!
	AGTIYDDILITDDIEEAEK	14	67479719				#DIV/0!
	FTPESEYNIMFGPDVCGGSK	2	67479719	C16(Carbamidomethyl)			#DIV/0!
	FTPESEYNIMFGPDVCGGSK	2	67479719	M10(Oxidation); C16(Carbamidomethyl)			#DIV/0!
	LDEEFSNKDKNLIVQYNLK	6	67479719				#DIV/0!
	FTPESEYNIMFGPDVCGGSKR	4	67479719	C16(Carbamidomethyl)			#DIV/0!
	FTPESEYNIMFGPDVCGGSKR	2	67479719	M10(Oxidation); C16(Carbamidomethyl)			#DIV/0!
	IDGVEKQEGKFDEDWDMLAPK	10	67479719				#DIV/0!
	AGTIYDDILITDDIEEAEKEAK	13	67479719				#DIV/0!
	IDGVEKQEGKFDEDWDMLAPK	8	67479719	M17(Oxidation)			#DIV/0!
	GEWVHPQIANPDYVYDPELYK	6	67479719				#DIV/0!
	KPEEWNDEDDGEWEAPTIENPEYK	4	67479719				#DIV/0!
	SIESEEKFTPESEYNIMFGPDVCGGSK	2	67479719	C23(Carbamidomethyl)			#DIV/0!
	KSIESEEKFTPESEYNIMFGPDVCGGSK	2	67479719	C24(Carbamidomethyl)			#DIV/0!
	KPEEWNDEDDGEWEAPTIENPEYKGEWKPK	2	67479719				#DIV/0!
	SIESEEKFTPESEYNIMFGPDVCGGSKR	1	67479719	M17(Oxidation); C23(Carbamidomethyl)			#DIV/0!
	EIDDPNVSKPADWVDEKEIDDPNDKKPEGWDDIPK	2	67479719				#DIV/0!
	FYIAAAK	2	67479719				#DIV/0!
	IPNPAYK	2	67479719				#DIV/0!
	SIESEEK	2	67479719				#DIV/0!
	RIPNPAYK	5	67479719				#DIV/0!
	MRDEIKEAEK	2	67479719	M1(Oxidation)			#DIV/0!
	ALGPFK	10	67479719				108.191
	GKNNLIR	1	67479719				#DIV/0!
	QKEEETKEEIK	1	67479719				#DIV/0!
	IDGVEK	2	67479719				#DIV/0!
67480419	hypothetical protein [Entamoeba histolytica HM-1:IMSS]	40.22	42	42	116.057	7.72314	30.9171
	Sequence	# PSMs	Protein Group Accessions	Modifications			#VALUE!
	EVLLHYGK	8	67480419				24.1492
	LLTDNIKR	2	67480419				0
	TNAFASYYR	4	67480419				11.519
	IDSFIETTQKE	2	67480419				0
	FSLQTICPFTLAK	4	67480419	C7(Carbamidomethyl)			70.379
	TAKDELLFK	6	67480419				11.4782
	LPKPIGSELYVPSTSNLPLTK	7	67480419				#DIV/0!
	LSEKNPNK	4	67480419				#DIV/0!
	SSVTMLSQK	2	67480419				#DIV/0!
	SSVTMLSQK	2	67480419	M5(Oxidation)			#DIV/0!
	LETLYAASR	2	67480419				#DIV/0!
	ESNLKDLVK	4	67480419				#DIV/0!
	FSTTDVIQR	2	67480419				#DIV/0!
	ITSNDAFWK	2	67480419				#DIV/0!
	LFSDIPEAMK	2	67480419				#DIV/0!
	LGSNCTGTSEK	2	67480419	C5(Carbamidomethyl)			#DIV/0!
	LENTFVVPEK	2	67480419				#DIV/0!
	IDSFIETTQK	2	67480419				#DIV/0!
	TPIAQFIIGNK	4	67480419				#DIV/0!
	CQLLEQLTSR	2	67480419	C1(Carbamidomethyl)			#DIV/0!
	ASSIFDVIVEAAR	2	67480419				#DIV/0!
	EQCELLSDNKR	3	67480419	C3(Carbamidomethyl)			#DIV/0!
	EAVDTDNEMFMK	2	67480419				#DIV/0!
	KDENVTIAINTVK	4	67480419				#DIV/0!
	EAVDTDNEMFMK	2	67480419	M9(Oxidation)			#DIV/0!
	NQYVDIVAETGKK	4	67480419				#DIV/0!
	RIDSFIETTQKE	2	67480419				#DIV/0!
	MLMQQVGNTDITAR	2	67480419				#DIV/0!
	MLMQQVGNTDITAR	4	67480419	M1(Oxidation)			#DIV/0!
	FLAETMFEETTALK	4	67480419				#DIV/0!
	ECLNSPNIIWFFK	2	67480419	C2(Carbamidomethyl)			#DIV/0!
	TPDEFIQMICQVVR	2	67480419	C10(Carbamidomethyl)			#DIV/0!
	TPDEFIQMICQVVR	2	67480419	C10(Nethylmaleimide)			#DIV/0!
	ELSMNEKLETLYAASR	4	67480419				#DIV/0!
	NKPHIITPSGEIVDINYIVDAK	2	67480419				#DIV/0!
	VLGQHPPKEPTPNQPLTSDEIAK	4	67480419				#DIV/0!
	KDENVTIAINTVKNERPAFNAMYK	2	67480419				#DIV/0!
	EIISVIK	2	67480419				#DIV/0!
	YLQTLKR	2	67480419				#DIV/0!
	NERPAFNAMYK	1	67480419				#DIV/0!
	DSDILK	2	67480419				#DIV/0!
	LMINSR	1	67480419	M2(Oxidation)			#DIV/0!
	LMINSR	2	67480419				#DIV/0!
	LASFGK	3	67480419				10.3616
	FKDELR	2	67480419				#DIV/0!
	IVTDPTMK	2	67480419				#DIV/0!
	YLQTLK	2	67480419				#DIV/0!
	Sequence	# PSMs	Protein Group Accessions	Modifications			#VALUE!
	AANASAAGK	2	511085103;449702969				0
	GNVASDAK	13	449702969;511085103				7.19669
	NGDSALVK	4	449702969;511085103				0
	CGGIDQR	4	449702969;511085103	C1(Carbamidomethyl)			9.38612
	FEELLSK	14	449702969;511085103				2.29254
	MDAIQYK	6	449702969;511085103				4.18124
	MDAIQYK	4	449702969;511085103	M1(Oxidation)			3.61095
	QMIVGVNK	10	449702969;511085103				4.35398
	CGGIDQR	4	449702969;511085103	C1(Nethylmaleimide+water)			3.44732
	TIEKFEK	8	449702969;511085103				6.16008
	QTVAVGVVK	11	449702969;511085103				2.64091
	QMIVGVNK	10	449702969;511085103	M2(Oxidation)			2.19452
	RGNVASDAK	6	449702969;511085103				13.5102
	LPLQDVYK	22	449702969;511085103				2.50898
	ISGIGTVPVGR	20	449702969				1.97903
	STTTGHLIYK	16	449702969;511085103				3.61438
	YAWVLDNLK	20	449702969;511085103				2.76065
	FEKESAEMGK	2	449702969;511085103				0
	FEKESAEMGK	8	449702969;511085103	M8(Oxidation)			4.72961
	SMEGGEPEYIK	8	449702969;511085103				2.43468
	SMEGGEPEYIK	10	449702969;511085103	M2(Oxidation)			2.13571
	MDAIQYKQER	21	449702969;511085103				4.38672
	DMKQTVAVGVVK	10	449702969;511085103	M2(Oxidation)			2.02237
	MDAIQYKQER	8	449702969;511085103	M1(Oxidation)			2.59504
	YYFTIIDAPGHR	24	449702969;511085103				2.16637
	YAWVLDNLKAER	10	449702969;511085103				3.24062
	THINIVVIGHVDSGK	20	449702969;511085103				60.698
	TIEKFEKESAEMGK	14	449702969;511085103				6.93289
	IVPTKPLCVEEFAK	24	449702969;511085103	C8(Carbamidomethyl)			1.74889
	TIEKFEKESAEMGK	12	449702969;511085103	M12(Oxidation)			5.94423
	IVPTKPLCVEEFAK	16	449702969;511085103	C8(Nethylmaleimide)			0.747407
	IVPTKPLCVEEFAK	36	449702969;511085103	C8(Nethylmaleimide+water)			1.79751
	QMIVGVNKMDAIQYK	2	449702969;511085103	M9(Oxidation)			0
	GYTPVLDCHTSHIACK	12	449702969;511085103	C8(Carbamidomethyl); C15(Carbamidomethyl)			2.56978
	YYFTIIDAPGHRDFIK	32	449702969;511085103				4.58885
	SMEGGEPEYIKNGDSALVK	5	449702969;511085103	M2(Oxidation)			#DIV/0!
	GPTLIGALDSVTPPERPVDKPLR	49	449702969;511085103				2.94079
	SIEMHHTALAQAIPGDNVGFNVR	12	449702969				3.19574
	SIEMHHTALAQAIPGDNVGFNVR	12	449702969	M4(Oxidation)			2.20423
	VETGILKPGTIVQFAPSGVSSECK	16	449702969	C23(Carbamidomethyl)			2.72548
	VETGILKPGTIVQFAPSGVSSECK	10	449702969	C23(Nethylmaleimide)			3.70872
	VETGILKPGTIVQFAPSGVSSECK	12	449702969	C23(Nethylmaleimide+water)			2.47082
	NQPAVGCEDFTAQVIVMNHPGQIR	8	449702969;511085103	C7(Carbamidomethyl)			7.21033
	NQPAVGCEDFTAQVIVMNHPGQIR	11	449702969;511085103	C7(Carbamidomethyl); M17(Oxidation)			3.24997
	NQPAVGCEDFTAQVIVMNHPGQIR	4	449702969;511085103	C7(Nethylmaleimide)			28.8581
	NQPAVGCEDFTAQVIVMNHPGQIR	2	449702969;511085103	C7(Nethylmaleimide); M17(Oxidation)			0
	NQPAVGCEDFTAQVIVMNHPGQIR	5	449702969;511085103	C7(Nethylmaleimide+water)			4.70394
	NQPAVGCEDFTAQVIVMNHPGQIRK	2	449702969;511085103	C7(Carbamidomethyl)			0
	ESAEMGKGSFK	3	449702969;511085103	M5(Oxidation)			1.66611
	GPTLIGALDSVTPPERPVDKPLRLPLQDVYK	22	449702969;511085103				23.0566
	GYTPVLDCHTSHIACKFEELLSK	9	449702969;511085103	C8(Carbamidomethyl); C15(Carbamidomethyl)			208.385
	EISAFLKK	2	449702969;511085103				#DIV/0!
	EHILLSYTLGVK	6	449702969;511085103				#DIV/0!
	QMIVGVNKMDAIQYK	2	449702969;511085103				#DIV/0!
	SMEGGEPEYIKNGDSALVK	4	449702969;511085103				#DIV/0!
	NQPAVGCEDFTAQVIVMNHPGQIR	2	449702969;511085103	C7(Nethylmaleimide+water); M17(Oxidation)			#DIV/0!
	NQPAVGCEDFTAQVIVMNHPGQIRK	5	449702969;511085103	C7(Carbamidomethyl); M17(Oxidation)			#DIV/0!
	ESAEMGK	4	449702969;511085103				8.14498
	CGGIDQR	8	449702969;511085103	C1(Nethylmaleimide)			3.64081
	FPPLGR	55	449702969;511085103				0.594177
	YEEIKK	1	449702969;511085103				#DIV/0!
511085103	elongation factor 1-alpha 1 [Entamoeba histolytica]	74.21	3	40	48.3791	8.92432	2.17153
	Sequence	# PSMs	Protein Group Accessions	Modifications			#VALUE!
	AANASAAGK	2	511085103;449702969				0
	GNVASDAK	13	449702969;511085103				7.19669
	NGDSALVK	4	449702969;511085103				0
	CGGIDQR	4	449702969;511085103	C1(Carbamidomethyl)			9.38612
	FEELLSK	14	449702969;511085103				2.29254
	MDAIQYK	6	449702969;511085103				4.18124
	MDAIQYK	4	449702969;511085103	M1(Oxidation)			3.61095
	QMIVGVNK	10	449702969;511085103				4.35398
	CGGIDQR	4	449702969;511085103	C1(Nethylmaleimide+water)			3.44732
	TIEKFEK	8	449702969;511085103				6.16008
	QTVAVGVVK	11	449702969;511085103				2.64091
	QMIVGVNK	10	449702969;511085103	M2(Oxidation)			2.19452
	RGNVASDAK	6	449702969;511085103				13.5102
	LPLQDVYK	22	449702969;511085103				2.50898
	ISGIGTVPCGR	6	511085103	C9(Carbamidomethyl)			2.8687
	STTTGHLIYK	16	449702969;511085103				3.61438
	YAWVLDNLK	20	449702969;511085103				2.76065
	FEKESAEMGK	2	449702969;511085103				0
	FEKESAEMGK	8	449702969;511085103	M8(Oxidation)			4.72961
	ISGIGTVPCGR	23	511085103	C9(Nethylmaleimide+water)			1.92376
	SMEGGEPEYIK	8	449702969;511085103				2.43468
	SMEGGEPEYIK	10	449702969;511085103	M2(Oxidation)			2.13571
	MDAIQYKQER	21	449702969;511085103				4.38672
	DMKQTVAVGVVK	10	449702969;511085103	M2(Oxidation)			2.02237
	MDAIQYKQER	8	449702969;511085103	M1(Oxidation)			2.59504
	YYFTIIDAPGHR	24	449702969;511085103				2.16637
	YAWVLDNLKAER	10	449702969;511085103				3.24062
	THINIVVIGHVDSGK	20	449702969;511085103				60.698
	TIEKFEKESAEMGK	14	449702969;511085103				6.93289
	IVPTKPLCVEEFAK	24	449702969;511085103	C8(Carbamidomethyl)			1.74889
	TIEKFEKESAEMGK	12	449702969;511085103	M12(Oxidation)			5.94423
	IVPTKPLCVEEFAK	16	449702969;511085103	C8(Nethylmaleimide)			0.747407
	IVPTKPLCVEEFAK	36	449702969;511085103	C8(Nethylmaleimide+water)			1.79751
	QMIVGVNKMDAIQYK	2	449702969;511085103	M9(Oxidation)			0
	GYTPVLDCHTSHIACK	12	449702969;511085103	C8(Carbamidomethyl); C15(Carbamidomethyl)			2.56978
	YYFTIIDAPGHRDFIK	32	449702969;511085103				4.58885
	SMEGGEPEYIKNGDSALVK	5	449702969;511085103	M2(Oxidation)			#DIV/0!
	GPTLIGALDSVTPPERPVDKPLR	49	449702969;511085103				2.94079
	SVEMHHTALAQAIPGDNVGFNVR	17	511085103				2.21211
	SVEMHHTALAQAIPGDNVGFNVR	18	511085103	M4(Oxidation)			1.68163
	VETGVLRPGTIVQFAPSGVSSECK	24	511085103	C23(Carbamidomethyl)			2.511
	VETGVLRPGTIVQFAPSGVSSECK	12	511085103	C23(Nethylmaleimide)			3.36233
	VETGVLRPGTIVQFAPSGVSSECK	14	511085103	C23(Nethylmaleimide+water)			2.28835
	NQPAVGCEDFTAQVIVMNHPGQIR	8	449702969;511085103	C7(Carbamidomethyl)			7.21033
	NQPAVGCEDFTAQVIVMNHPGQIR	11	449702969;511085103	C7(Carbamidomethyl); M17(Oxidation)			3.24997
	NQPAVGCEDFTAQVIVMNHPGQIR	4	449702969;511085103	C7(Nethylmaleimide)			28.8581
	NQPAVGCEDFTAQVIVMNHPGQIR	2	449702969;511085103	C7(Nethylmaleimide); M17(Oxidation)			0
	NQPAVGCEDFTAQVIVMNHPGQIR	5	449702969;511085103	C7(Nethylmaleimide+water)			4.70394
	NQPAVGCEDFTAQVIVMNHPGQIRK	2	449702969;511085103	C7(Carbamidomethyl)			0
	ESAEMGKGSFK	3	449702969;511085103	M5(Oxidation)			1.66611
	GPTLIGALDSVTPPERPVDKPLRLPLQDVYK	22	449702969;511085103				23.0566
	GYTPVLDCHTSHIACKFEELLSK	9	449702969;511085103	C8(Carbamidomethyl); C15(Carbamidomethyl)			208.385
	EISAFLKK	2	449702969;511085103				#DIV/0!
	EHILLSYTLGVK	6	449702969;511085103				#DIV/0!
	QMIVGVNKMDAIQYK	2	449702969;511085103				#DIV/0!
	SMEGGEPEYIKNGDSALVK	4	449702969;511085103				#DIV/0!
	NQPAVGCEDFTAQVIVMNHPGQIR	2	449702969;511085103	C7(Nethylmaleimide+water); M17(Oxidation)			#DIV/0!
	NQPAVGCEDFTAQVIVMNHPGQIRK	5	449702969;511085103	C7(Carbamidomethyl); M17(Oxidation)			#DIV/0!
	ESAEMGK	4	449702969;511085103				8.14498
	CGGIDQR	8	449702969;511085103	C1(Nethylmaleimide)			3.64081
	FPPLGR	55	449702969;511085103				0.594177
	YEEIKK	1	449702969;511085103				#DIV/0!
	Sequence	# PSMs	Protein Group Accessions	Modifications			#VALUE!
	VGGYGVSK	2	67478790				0
	ATFDMAR	6	67478790				0.362815
	TVSQGADAR	2	67478790				0
	SQIEESIK	5	67478790				2.42142
	TYGLDIFK	4	67478790				1.89794
	YGDIDLNPK	2	67478790				#DIV/0!
	FKFELIDK	8	67478790				1.36878
	NITKEETIK	2	67478790				#DIV/0!
	LNNLFNNTK	4	67478790				1.87016
	KPIPSSASSAR	2	67478790				0
	TVTGCIQYLVK	2	67478790	C5(Carbamidomethyl)			0
	IEDVPTGVDNTK	2	67478790				0
	SMNEQVEEMLK	2	67478790				0
	DNTSPTASVDLVK	6	67478790				1.96083
	ELQQAQEELLR	4	67478790				1.39373
	SALEFACNEAER	6	67478790	C7(Carbamidomethyl)			1.73702
	DANWEEGLISAAK	2	67478790				0
	LLAVTSSEEGCQK	8	67478790	C11(Carbamidomethyl)			1.7176
	VNILYTDEYGLK	4	67478790				2.11095
	ELVGAANVINNALGK	6	67478790				1.66828
	ETPLEDLPALFEK	6	67478790				0
	SVAVLDTDTAAQIVDK	4	67478790				1.3927
	LLSLPVDEQGAQLPEK	4	67478790				1.47404
	IRETPLEDLPALFEK	6	67478790				1.56573
	ALDKLPERPQGEFILWQPTR	4	67478790				0
	NVNDTDQQQLHLLYTDCTFK	2	67478790	C17(Carbamidomethyl)			#DIV/0!
	QLQAEQQAAYEAAVAANEAAAVPR	4	67478790				2.01388
	IDEGNQEQVAVILDDFKDVVQK	4	67478790				13.6117
	STTTTTKPNTTTTKPNTTTTKPSPATPAR	1	67478790				0
	QLLAVIK	2	67478790				#DIV/0!
	VYNESTKK	3	67478790				#DIV/0!
	GVVDLSLEEQYDEIAK	2	67478790				#DIV/0!
	AANDQVIHNKPSEAMLVACAK	2	67478790	C19(Carbamidomethyl)			#DIV/0!
	AKIDEGNQEQVAVILDDFKDVVQK	2	67478790				#DIV/0!
	SEVAPPK	2	67478790				0
	DKLESGER	2	67478790				0
	IVEANK	1	67478790				#DIV/0!
183232225	Plasma membrane calcium-transporting ATPase [Entamoeba histolytica HM-1:IMSS]	35.77	36	37	113.863	5.46533	5.69029
	Sequence	# PSMs	Protein Group Accessions	Modifications			#VALUE!
	SLDLNNTK	4	183232225				7.48503
	QNIDYEAR	4	183232225				7.58716
	GLDGNDLKER	6	183232225				5.12712
	KGENTLISIR	4	183232225				4.9963
	ELGGTEGICK	4	183232225	C9(Nethylmaleimide)			0
	MVTGDNIATGR	6	183232225				5.09457
	MVTGDNIATGR	6	183232225	M1(Oxidation)			5.29471
	MSTIIYNEDK	4	183232225				6.74423
	YLTETQILQIK	4	183232225				6.56486
	SISSAVYMEDGILK	4	183232225				2.95138
	SISSAVYMEDGILK	4	183232225	M8(Oxidation)			0
	LGEEVYNNISCNK	4	183232225	C11(Carbamidomethyl)			5.7123
	LGEEVYNNISCNK	4	183232225	C11(Nethylmaleimide+water)			0.786822
	LTDEEVDNILPTLR	10	183232225				4.24815
	ESLNQDKPRPTPLQEK	2	183232225				0
	ELTFLNAPCAYIDHGDFGQYK	4	183232225	C9(Carbamidomethyl)			23.5496
	GAPEVILSK	4	183232225				#DIV/0!
	YSQFGQNK	4	183232225				#DIV/0!
	FMELSQDEK	2	183232225				#DIV/0!
	EADVGLAMGIR	3	183232225				#DIV/0!
	DKSLDLNNTK	2	183232225				#DIV/0!
	GWFGGEVMER	4	183232225				#DIV/0!
	TECALLGYCLK	2	183232225	C3(Carbamidomethyl); C9(Carbamidomethyl)			#DIV/0!
	GWFGGEVMERDK	2	183232225				#DIV/0!
	DGTTVILTEDDRK	2	183232225				#DIV/0!
	VDESDMTGEPVAVK	2	183232225				#DIV/0!
	VDESDMTGEPVAVKK	2	183232225				#DIV/0!
	FMELSQDEKNVNIK	4	183232225				#DIV/0!
	FMELSQDEKNVNIK	2	183232225	M2(Oxidation)			#DIV/0!
	LSSIIYQQFAFSSAR	2	183232225				#DIV/0!
	TLLDFQLSCANQGMR	2	183232225	C9(Carbamidomethyl)			#DIV/0!
	TIGNKTECALLGYCLK	2	183232225	C8(Carbamidomethyl); C14(Carbamidomethyl)			#DIV/0!
	QASDIVILDDNFNSIVK	4	183232225				#DIV/0!
	IIESDSDFCIEGPQFAK	2	183232225	C9(Carbamidomethyl)			#DIV/0!
	YLTETQILQIKENFFGK	2	183232225				#DIV/0!
	TLSLAVR	2	183232225				#DIV/0!
	AVMWGR	5	183232225				14.1968
	LHSINDIEK	2	183232225				#DIV/0!
	MGSPLK	2	183232225				#DIV/0!
	CVYDNIR	2	183232225;67475672;183232596;449704863	C1(Nethylmaleimide)			0
	QRVEYSGK	1	183232225				#DIV/0!
	Sequence	# PSMs	Protein Group Accessions	Modifications			#VALUE!
	EMLQQNK	2	67474797				0
	EEYASFYK	2	67474797				0
	APFDMFETK	6	67474797				1.43992
	APFDMFETK	2	67474797	M5(Oxidation)			#DIV/0!
	EIYFITGESK	2	67474797				0
	VHTDNSDKTVK	3	67474797				11.8616
	VTHEWEQVNK	2	67474797				0
	EIYFITGESKK	2	67474797				0
	ADLINCLGTIAR	4	67474797	C6(Carbamidomethyl)			0
	SVLEAEPELVIR	6	67474797				1.11178
	LGIHEDSTNRDK	3	67474797				0.599298
	KVTHEWEQVNK	2	67474797				0
	QLIIEDTGIGMTK	2	67474797				0
	QLIIEDTGIGMTK	2	67474797	M11(Oxidation)			0
	GVVDSEDLPLNVSR	8	67474797				0.780003
	LKEDMQEYLETK	6	67474797				1.34371
	TISNDWEDHLAVK	8	67474797				1.31438
	SGEDMTSFKDYIAR	2	67474797				0
	SGEDMTSFKDYIAR	2	67474797	M5(Oxidation)			0
	KAVETSPFVEGFVKK	2	67474797				0
	NPSEITKEEYASFYK	7	67474797				0.166962
	HSEFIQYPIMLYVTK	4	67474797				#DIV/0!
	ITADKDNK	2	67474797				#DIV/0!
	QKPIWTR	2	67474797				#DIV/0!
	EILGDKIEK	4	67474797				#DIV/0!
	DNSMSTYMVSK	2	67474797				#DIV/0!
	ELIPEWLGFIK	2	67474797				#DIV/0!
	ELISNCSDALDK	2	67474797	C6(Carbamidomethyl)			#DIV/0!
	LKEDMQEYLETKK	2	67474797				#DIV/0!
	TLEINPDHPIVQELR	2	67474797				#DIV/0!
	ELISNCSDALDK	1	67474797	C6(Nethylmaleimide)			#DIV/0!
	FYEAFGK	4	67474797				1.95786
	YQSLQDK	2	67474797				#DIV/0!
	VTVITK	3	67474797				2.92409
	IAELLR	4	67474797				2.10747
	IQEIIKK	2	67474797				#DIV/0!
	KIQEIIKK	1	67474797				0
	LVCITK	1	67474797	C3(Carbamidomethyl)			#DIV/0!
472458580	GTP-binding protein [Entamoeba histolytica HM-3:IMSS]	42.21	34	34	101.637	5.73193	2.55932
	Sequence	# PSMs	Protein Group Accessions	Modifications			#VALUE!
	QIDAALER	4	472458580				1.90382
	DIMEDIMR	4	472458580				1.31608
	VKGEFTIIR	4	472458580				1.63873
	IEESDDQYK	4	472458580				2.03133
	FQASNMSLLK	2	472458580				0
	IELPYLLER	2	472458580				0
	ITPYLEACKK	2	472458580	C8(Carbamidomethyl)			0
	NEYALLYNKK	2	472458580				0
	KIELPYLLER	6	472458580				1.22503
	TIPFFTPLIDK	4	472458580				1.86626
	DIGIAYEDSVSK	2	472458580				0
	STLLNYLFNTK	8	472458580				4.3122
	EADTPFDQIER	4	472458580				1.39182
	ELIETLNGFFEK	4	472458580				2.7436
	DGDLPSESIETLPK	6	472458580				1.02597
	DREADTPFDQIER	3	472458580				4.74205
	QHFGDYLESTIKPK	2	472458580				0
	GMDYNAVGILGAQSSGK	2	472458580	M2(Oxidation)			#DIV/0!
	ESNIVVFDLEGTDGSAR	4	472458580				0
	YMETIVEEIEEQLKK	2	472458580				0
	KWEPTDDVDTLYFAAR	2	472458580				0
	IWDTVIPPEEFINSPINR	10	472458580				1.94835
	GNIIEDFKK	1	472458580				0
	NYILSKPEFLKR	1	472458580				0
	IEESDDQYKFTINYR	1	472458580				0
	ILNEVMGR	2	472458580				#DIV/0!
	TLIVFVIR	2	472458580				#DIV/0!
	QLCGLVESLFER	2	472458580	C3(Carbamidomethyl)			#DIV/0!
	TEIPECGIQIIDGDGNFASTDTR	1	472458580	C6(Carbamidomethyl)			#DIV/0!
	DDNNTEETQEEIK	2	472458580				0
	QAELMEK	1	472458580				#DIV/0!
	YSQELSR	1	472458580				#DIV/0!
	FTINYR	1	472458580				0
	GYLIALR	2	472458580				1.11159
	Sequence	# PSMs	Protein Group Accessions	Modifications			#VALUE!
	VIAPPERK	10	511086192;511084606;511085271;511085359;511085803;511087894;511088092;511083523				9.10466
	AASSSELEK	7	511086192;511084606;511085359;511087894;511083523;511085271;511088092;511085803				14.1894
	AGFAGDDAPR	22	511083523;511084606;511085271;511085359;511087894;511088092;511085803;511086192				9.29538
	DLTDYLMK	40	511086192;511084606;511085359;511087894;511083523;511085271;511088092;511085803				4.92966
	DLTDYLMK	19	511086192;511084606;511085359;511087894;511083523;511085271;511088092;511085803	M7(Oxidation)			3.65803
	IKVIAPPER	12	511086192;511084606;511085271;511085359;511085803;511087894;511088092				6.41235
	GYAFTTTAER	23	511086192;511084606;511085359;511087894;511083523;511085271;511088092				3.5399
	HVSVMAGMGQK	22	511083523;511084606;511085271;511085359;511087894;511088092;511085803;511086192				10.6449
	IKVIAPPERK	8	511086192;511084606;511085271;511085359;511085803;511087894;511088092				8.94168
	HVSVMAGMGQK	34	511083523;511084606;511085271;511085359;511087894;511088092;511085803;511086192	M8(Oxidation)			9.63597
	HVSVMAGMGQK	10	511083523;511084606;511085271;511085359;511087894;511088092;511085803;511086192	M5(Oxidation); M8(Oxidation)			7.94228
	DAYVGDEAQSK	20	511083523;511084606;511085271;511085359;511087894;511088092;511086192				14.8521
	AVFPSIVGRPR	65	511083523;511084606;511085271;511085359;511087894;511088092;511085803				4.08537
	EMIQLAPPTMK	14	511086192;511084606;511085271;511085359;511085803;511087894;511088092;511083523				4.60664
	EMIQLAPPTMK	35	511086192;511084606;511085271;511085359;511085803;511087894;511088092;511083523	M2(Oxidation)			3.85064
	EMIQLAPPTMK	10	511086192;511084606;511085271;511085359;511085803;511087894;511088092;511083523	M2(Oxidation); M10(Oxidation)			2.66952
	DAYVGDEAQSKR	22	511083523;511084606;511085271;511085359;511087894;511088092;511086192				11.1778
	EEYDESGPAIVHR	16	511086192;511084606;511085271;511085359;511085803;511087894;511088092;511083523				5.22112
	IWHHTFYNELR	31	511083523;511084606;511085271;511085359;511087894;511088092;511086192;511085803				#DIV/0!
	GYAFTTTAEREIVR	7	511086192;511084606;511085359;511087894;511083523;511085271;511088092				7.86047
	LDLAGRDLTDYLMK	23	511086192;511084606;511085359;511087894;511083523;511085271;511088092;511085803				14.0063
	LEKEMIQLAPPTMK	14	511086192;511084606;511085271;511085359;511085803;511087894;511088092;511083523				15.3247
	EEYDESGPAIVHRK	14	511086192;511084606;511085271;511085359;511085803;511087894;511088092;511083523				6.32357
	LDLAGRDLTDYLMK	13	511086192;511084606;511085359;511087894;511083523;511085271;511088092;511085803	M13(Oxidation)			5.38825
	LEKEMIQLAPPTMK	30	511086192;511084606;511085271;511085359;511085803;511087894;511088092;511083523	M5(Oxidation)			6.33825
	LEKEMIQLAPPTMK	14	511086192;511084606;511085271;511085359;511085803;511087894;511088092;511083523	M5(Oxidation); M13(Oxidation)			126.5
	LCYVAEDFNEEMQK	30	511086192;511084606;511085359;511087894;511083523;511085271;511088092;511085803	C2(Carbamidomethyl)			5.91572
	SYELPDGQVITVGNER	58	511086192;511084606;511085359;511087894;511083523;511085271;511088092;511085803				2.46492
	LCYVAEDFNEEMQK	23	511086192;511084606;511085359;511087894;511083523;511085271;511088092;511085803	C2(Carbamidomethyl); M12(Oxidation)			3.85199
	LCYVAEDFNEEMQK	22	511086192;511084606;511085359;511087894;511083523;511085271;511088092;511085803	C2(Nethylmaleimide)			9.88896
	LCYVAEDFNEEMQK	6	511086192;511084606;511085359;511087894;511083523;511085271;511088092;511085803	C2(Nethylmaleimide); M12(Oxidation)			#DIV/0!
	LCYVAEDFNEEMQK	23	511086192;511084606;511085359;511087894;511083523;511085271;511088092;511085803	C2(Nethylmaleimide+water)			17.81
	YPIEHGIVNNWDDMEK	15	511083523;511084606;511085271;511085359;511087894;511088092;511086192;511085803				10.6444
	VAPEEHPVLLTEAPMNPK	30	511083523;511084606;511085271;511085359;511087894;511088092;511086192				6.5511
	YPIEHGIVNNWDDMEK	8	511083523;511084606;511085271;511085359;511087894;511088092;511086192;511085803	M14(Oxidation)			91.6629
	VAPEEHPVLLTEAPMNPK	67	511083523;511084606;511085271;511085359;511087894;511088092;511086192	M15(Oxidation)			4.97668
	EKLCYVAEDFNEEMQK	6	511086192;511084606;511085359;511087894;511083523;511085271;511088092;511085803	C4(Carbamidomethyl)			4.14876
	DLYGNIVLSGGTSMYPGINTR	10	511086192;511084606;511085271;511085359;511085803;511087894;511088092;511083523	M14(Oxidation)			26.0712
	KDLYGNIVLSGGTSMYPGINTR	4	511086192;511084606;511085271;511085359;511085803;511087894;511088092;511083523				20.883
	KDLYGNIVLSGGTSMYPGINTR	8	511086192;511084606;511085271;511085359;511085803;511087894;511088092;511083523	M15(Oxidation)			6.04019
	AASSSELEKSYELPDGQVITVGNER	8	511086192;511084606;511085359;511087894;511083523;511085271;511088092;511085803				9.10351
	TTGIVMDSGDGVSHTVPIYEGFSLPHAILR	31	511086192;511084606;511085359;511087894;511085803				17.0184
	TTGIVMDSGDGVSHTVPIYEGFSLPHAILR	29	511086192;511084606;511085359;511087894;511085803	M6(Oxidation)			4.92867
	CDVDIRK	10	511086192;511084606;511085271;511085359;511085803;511087894;511088092;511083523	C1(Nethylmaleimide+water)			16.0853
	CDVDIRK	2	511086192;511084606;511085271;511085359;511085803;511087894;511088092;511083523	C1(Carbamidomethyl)			#DIV/0!
	LCYVAEDFNEEMQK	10	511086192;511084606;511085359;511087894;511083523;511085271;511088092;511085803	C2(Nethylmaleimide+water); M12(Oxidation)			#DIV/0!
	EKLCYVAEDFNEEMQK	2	511086192;511084606;511085359;511087894;511083523;511085271;511088092;511085803	C4(Carbamidomethyl); M14(Oxidation)			#DIV/0!
	DLYGNIVLSGGTSMYPGINTR	21	511086192;511084606;511085271;511085359;511085803;511087894;511088092;511083523				#DIV/0!
	VAPEEHPVLLTEAPMNPKANREK	1	511083523;511084606;511085271;511085359;511087894;511088092;511086192				#DIV/0!
	EKLCYVAEDFNEEMQK	1	511086192;511084606;511085359;511087894;511083523;511085271;511088092;511085803	C4(Nethylmaleimide+water)			#DIV/0!
	FRCPEALFQPPFLGMECNGIHETTYNSIMK	3	511084606	C3(Carbamidomethyl); M15(Oxidation); C17(Oxidation); M29(Oxidation)			#DIV/0!
	CPEALFQPPFLGMECNGIHETTYNSIMK	5	511084606	C1(Carbamidomethyl); M13(Oxidation); C15(Oxidation); M27(Oxidation)			#DIV/0!
	CDVDIRK	7	511086192;511084606;511085271;511085359;511085803;511087894;511088092;511083523	C1(Nethylmaleimide)			13.9089
	CDVDIR	3	511086192;511084606;511085271;511085359;511085803;511087894;511088092;511083523	C1(Carbamidomethyl)			14.4139
	CDVDIR	3	511086192;511084606;511085271;511085359;511085803;511087894;511088092;511083523	C1(Nethylmaleimide+water)			#DIV/0!
	LDLAGR	7	511086192;511084606;511085359;511087894;511083523;511085271;511088092;511085803				7.2296
511085271	actin, putative [Entamoeba histolytica]	73.14	1	33	42.0218	5.32568	5.79642
	Sequence	# PSMs	Protein Group Accessions	Modifications			#VALUE!
	VIAPPERK	10	511086192;511084606;511085271;511085359;511085803;511087894;511088092;511083523				9.10466
	AASSSELEK	7	511086192;511084606;511085359;511087894;511083523;511085271;511088092;511085803				14.1894
	AGFAGDDAPR	22	511083523;511084606;511085271;511085359;511087894;511088092;511085803;511086192				9.29538
	DLTDYLMK	40	511086192;511084606;511085359;511087894;511083523;511085271;511088092;511085803				4.92966
	DLTDYLMK	19	511086192;511084606;511085359;511087894;511083523;511085271;511088092;511085803	M7(Oxidation)			3.65803
	IKVIAPPER	12	511086192;511084606;511085271;511085359;511085803;511087894;511088092				6.41235
	GYAFTTTAER	23	511086192;511084606;511085359;511087894;511083523;511085271;511088092				3.5399
	HVSVMAGMGQK	22	511083523;511084606;511085271;511085359;511087894;511088092;511085803;511086192				10.6449
	IKVIAPPERK	8	511086192;511084606;511085271;511085359;511085803;511087894;511088092				8.94168
	HVSVMAGMGQK	34	511083523;511084606;511085271;511085359;511087894;511088092;511085803;511086192	M8(Oxidation)			9.63597
	HVSVMAGMGQK	10	511083523;511084606;511085271;511085359;511087894;511088092;511085803;511086192	M5(Oxidation); M8(Oxidation)			7.94228
	DAYVGDEAQSK	20	511083523;511084606;511085271;511085359;511087894;511088092;511086192				14.8521
	AVFPSIVGRPR	65	511083523;511084606;511085271;511085359;511087894;511088092;511085803				4.08537
	EMIQLAPPTMK	14	511086192;511084606;511085271;511085359;511085803;511087894;511088092;511083523				4.60664
	EMIQLAPPTMK	35	511086192;511084606;511085271;511085359;511085803;511087894;511088092;511083523	M2(Oxidation)			3.85064
	EMIQLAPPTMK	10	511086192;511084606;511085271;511085359;511085803;511087894;511088092;511083523	M2(Oxidation); M10(Oxidation)			2.66952
	DAYVGDEAQSKR	22	511083523;511084606;511085271;511085359;511087894;511088092;511086192				11.1778
	EEYDESGPAIVHR	16	511086192;511084606;511085271;511085359;511085803;511087894;511088092;511083523				5.22112
	IWHHTFYNELR	31	511083523;511084606;511085271;511085359;511087894;511088092;511086192;511085803				#DIV/0!
	GYAFTTTAEREIVR	7	511086192;511084606;511085359;511087894;511083523;511085271;511088092				7.86047
	LDLAGRDLTDYLMK	23	511086192;511084606;511085359;511087894;511083523;511085271;511088092;511085803				14.0063
	LEKEMIQLAPPTMK	14	511086192;511084606;511085271;511085359;511085803;511087894;511088092;511083523				15.3247
	EEYDESGPAIVHRK	14	511086192;511084606;511085271;511085359;511085803;511087894;511088092;511083523				6.32357
	LDLAGRDLTDYLMK	13	511086192;511084606;511085359;511087894;511083523;511085271;511088092;511085803	M13(Oxidation)			5.38825
	LEKEMIQLAPPTMK	30	511086192;511084606;511085271;511085359;511085803;511087894;511088092;511083523	M5(Oxidation)			6.33825
	LEKEMIQLAPPTMK	14	511086192;511084606;511085271;511085359;511085803;511087894;511088092;511083523	M5(Oxidation); M13(Oxidation)			126.5
	LCYVAEDFNEEMQK	30	511086192;511084606;511085359;511087894;511083523;511085271;511088092;511085803	C2(Carbamidomethyl)			5.91572
	SYELPDGQVITVGNER	58	511086192;511084606;511085359;511087894;511083523;511085271;511088092;511085803				2.46492
	LCYVAEDFNEEMQK	23	511086192;511084606;511085359;511087894;511083523;511085271;511088092;511085803	C2(Carbamidomethyl); M12(Oxidation)			3.85199
	TVPIYEGFSLPHAILR	6	511085271				6.64421
	LCYVAEDFNEEMQK	22	511086192;511084606;511085359;511087894;511083523;511085271;511088092;511085803	C2(Nethylmaleimide)			9.88896
	LCYVAEDFNEEMQK	6	511086192;511084606;511085359;511087894;511083523;511085271;511088092;511085803	C2(Nethylmaleimide); M12(Oxidation)			#DIV/0!
	LCYVAEDFNEEMQK	23	511086192;511084606;511085359;511087894;511083523;511085271;511088092;511085803	C2(Nethylmaleimide+water)			17.81
	YPIEHGIVNNWDDMEK	15	511083523;511084606;511085271;511085359;511087894;511088092;511086192;511085803				10.6444
	VAPEEHPVLLTEAPMNPK	30	511083523;511084606;511085271;511085359;511087894;511088092;511086192				6.5511
	YPIEHGIVNNWDDMEK	8	511083523;511084606;511085271;511085359;511087894;511088092;511086192;511085803	M14(Oxidation)			91.6629
	VAPEEHPVLLTEAPMNPK	67	511083523;511084606;511085271;511085359;511087894;511088092;511086192	M15(Oxidation)			4.97668
	EKLCYVAEDFNEEMQK	6	511086192;511084606;511085359;511087894;511083523;511085271;511088092;511085803	C4(Carbamidomethyl)			4.14876
	DLYGNIVLSGGTSMYPGINTR	10	511086192;511084606;511085271;511085359;511085803;511087894;511088092;511083523	M14(Oxidation)			26.0712
	KDLYGNIVLSGGTSMYPGINTR	4	511086192;511084606;511085271;511085359;511085803;511087894;511088092;511083523				20.883
	KDLYGNIVLSGGTSMYPGINTR	8	511086192;511084606;511085271;511085359;511085803;511087894;511088092;511083523	M15(Oxidation)			6.04019
	AASSSELEKSYELPDGQVITVGNER	8	511086192;511084606;511085359;511087894;511083523;511085271;511088092;511085803				9.10351
	CDVDIRK	10	511086192;511084606;511085271;511085359;511085803;511087894;511088092;511083523	C1(Nethylmaleimide+water)			16.0853
	CDVDIRK	2	511086192;511084606;511085271;511085359;511085803;511087894;511088092;511083523	C1(Carbamidomethyl)			#DIV/0!
	LCYVAEDFNEEMQK	10	511086192;511084606;511085359;511087894;511083523;511085271;511088092;511085803	C2(Nethylmaleimide+water); M12(Oxidation)			#DIV/0!
	EKLCYVAEDFNEEMQK	2	511086192;511084606;511085359;511087894;511083523;511085271;511088092;511085803	C4(Carbamidomethyl); M14(Oxidation)			#DIV/0!
	DLYGNIVLSGGTSMYPGINTR	21	511086192;511084606;511085271;511085359;511085803;511087894;511088092;511083523				#DIV/0!
	CPEALFQPSFLGMECNGIHETTYNSIMK	2	511086192;511085271;511085803;511088092;511083523	C1(Carbamidomethyl); C15(Carbamidomethyl)			#DIV/0!
	CPEALFQPSFLGMECNGIHETTYNSIMK	4	511086192;511085271;511085803;511088092;511083523	C1(Carbamidomethyl); M13(Oxidation); C15(Carbamidomethyl)			#DIV/0!
	CPEALFQPSFLGMECNGIHETTYNSIMK	5	511086192;511085271;511085803;511088092;511083523	C1(Carbamidomethyl); M13(Oxidation); C15(Carbamidomethyl); M27(Oxidation)			#DIV/0!
	FRCPEALFQPSFLGMECNGIHETTYNSIMK	2	511086192;511085271;511085803;511088092;511083523	C3(Carbamidomethyl); C17(Carbamidomethyl)			#DIV/0!
	FRCPEALFQPSFLGMECNGIHETTYNSIMK	2	511086192;511085271;511085803;511088092;511083523	C3(Carbamidomethyl); M15(Oxidation); C17(Carbamidomethyl)			#DIV/0!
	VAPEEHPVLLTEAPMNPKANREK	1	511083523;511084606;511085271;511085359;511087894;511088092;511086192				#DIV/0!
	EKLCYVAEDFNEEMQK	1	511086192;511084606;511085359;511087894;511083523;511085271;511088092;511085803	C4(Nethylmaleimide+water)			#DIV/0!
	FRCPEALFQPSFLGMECNGIHETTYNSIMK	1	511086192;511085271;511085803;511088092;511083523	C3(Carbamidomethyl); C17(Nethylmaleimide+water)			#DIV/0!
	CPEALFQPSFLGMECNGIHETTYNSIMK	1	511086192;511085271;511085803;511088092;511083523	C1(Carbamidomethyl); C15(Nethylmaleimide+water)			#DIV/0!
	CDVDIRK	7	511086192;511084606;511085271;511085359;511085803;511087894;511088092;511083523	C1(Nethylmaleimide)			13.9089
	CDVDIR	3	511086192;511084606;511085271;511085359;511085803;511087894;511088092;511083523	C1(Carbamidomethyl)			14.4139
	CDVDIR	3	511086192;511084606;511085271;511085359;511085803;511087894;511088092;511083523	C1(Nethylmaleimide+water)			#DIV/0!
	LDLAGR	7	511086192;511084606;511085359;511087894;511083523;511085271;511088092;511085803				7.2296
	Sequence	# PSMs	Protein Group Accessions	Modifications			#VALUE!
	VIAPPERK	10	511086192;511084606;511085271;511085359;511085803;511087894;511088092;511083523				9.10466
	AASSSELEK	7	511086192;511084606;511085359;511087894;511083523;511085271;511088092;511085803				14.1894
	AGFAGDDAPR	22	511083523;511084606;511085271;511085359;511087894;511088092;511085803;511086192				9.29538
	DLTDYLMK	40	511086192;511084606;511085359;511087894;511083523;511085271;511088092;511085803				4.92966
	DLTDYLMK	19	511086192;511084606;511085359;511087894;511083523;511085271;511088092;511085803	M7(Oxidation)			3.65803
	IKVIAPPER	12	511086192;511084606;511085271;511085359;511085803;511087894;511088092				6.41235
	GYAFTTTAER	23	511086192;511084606;511085359;511087894;511083523;511085271;511088092				3.5399
	HVSVMAGMGQK	22	511083523;511084606;511085271;511085359;511087894;511088092;511085803;511086192				10.6449
	IKVIAPPERK	8	511086192;511084606;511085271;511085359;511085803;511087894;511088092				8.94168
	HVSVMAGMGQK	34	511083523;511084606;511085271;511085359;511087894;511088092;511085803;511086192	M8(Oxidation)			9.63597
	HVSVMAGMGQK	10	511083523;511084606;511085271;511085359;511087894;511088092;511085803;511086192	M5(Oxidation); M8(Oxidation)			7.94228
	DAYVGDEAQSK	20	511083523;511084606;511085271;511085359;511087894;511088092;511086192				14.8521
	AVFPSIVGRPR	65	511083523;511084606;511085271;511085359;511087894;511088092;511085803				4.08537
	EMIQLAPPTMK	14	511086192;511084606;511085271;511085359;511085803;511087894;511088092;511083523				4.60664
	EMIQLAPPTMK	35	511086192;511084606;511085271;511085359;511085803;511087894;511088092;511083523	M2(Oxidation)			3.85064
	EMIQLAPPTMK	10	511086192;511084606;511085271;511085359;511085803;511087894;511088092;511083523	M2(Oxidation); M10(Oxidation)			2.66952
	DAYVGDEAQSKR	22	511083523;511084606;511085271;511085359;511087894;511088092;511086192				11.1778
	EEYDESGPAIVHR	16	511086192;511084606;511085271;511085359;511085803;511087894;511088092;511083523				5.22112
	IWHHTFYNELR	31	511083523;511084606;511085271;511085359;511087894;511088092;511086192;511085803				#DIV/0!
	GYAFTTTAEREIVR	7	511086192;511084606;511085359;511087894;511083523;511085271;511088092				7.86047
	LDLAGRDLTDYLMK	23	511086192;511084606;511085359;511087894;511083523;511085271;511088092;511085803				14.0063
	LEKEMIQLAPPTMK	14	511086192;511084606;511085271;511085359;511085803;511087894;511088092;511083523				15.3247
	EEYDESGPAIVHRK	14	511086192;511084606;511085271;511085359;511085803;511087894;511088092;511083523				6.32357
	LDLAGRDLTDYLMK	13	511086192;511084606;511085359;511087894;511083523;511085271;511088092;511085803	M13(Oxidation)			5.38825
	LEKEMIQLAPPTMK	30	511086192;511084606;511085271;511085359;511085803;511087894;511088092;511083523	M5(Oxidation)			6.33825
	LEKEMIQLAPPTMK	14	511086192;511084606;511085271;511085359;511085803;511087894;511088092;511083523	M5(Oxidation); M13(Oxidation)			126.5
	LCYVAEDFNEEMQK	30	511086192;511084606;511085359;511087894;511083523;511085271;511088092;511085803	C2(Carbamidomethyl)			5.91572
	SYELPDGQVITVGNER	58	511086192;511084606;511085359;511087894;511083523;511085271;511088092;511085803				2.46492
	LCYVAEDFNEEMQK	23	511086192;511084606;511085359;511087894;511083523;511085271;511088092;511085803	C2(Carbamidomethyl); M12(Oxidation)			3.85199
	LCYVAEDFNEEMQK	22	511086192;511084606;511085359;511087894;511083523;511085271;511088092;511085803	C2(Nethylmaleimide)			9.88896
	LCYVAEDFNEEMQK	6	511086192;511084606;511085359;511087894;511083523;511085271;511088092;511085803	C2(Nethylmaleimide); M12(Oxidation)			#DIV/0!
	LCYVAEDFNEEMQK	23	511086192;511084606;511085359;511087894;511083523;511085271;511088092;511085803	C2(Nethylmaleimide+water)			17.81
	YPIEHGIVNNWDDMEK	15	511083523;511084606;511085271;511085359;511087894;511088092;511086192;511085803				10.6444
	VAPEEHPVLLTEAPMNPK	30	511083523;511084606;511085271;511085359;511087894;511088092;511086192				6.5511
	YPIEHGIVNNWDDMEK	8	511083523;511084606;511085271;511085359;511087894;511088092;511086192;511085803	M14(Oxidation)			91.6629
	VAPEEHPVLLTEAPMNPK	67	511083523;511084606;511085271;511085359;511087894;511088092;511086192	M15(Oxidation)			4.97668
	EKLCYVAEDFNEEMQK	6	511086192;511084606;511085359;511087894;511083523;511085271;511088092;511085803	C4(Carbamidomethyl)			4.14876
	DLYGNIVLSGGTSMYPGINTR	10	511086192;511084606;511085271;511085359;511085803;511087894;511088092;511083523	M14(Oxidation)			26.0712
	KDLYGNIVLSGGTSMYPGINTR	4	511086192;511084606;511085271;511085359;511085803;511087894;511088092;511083523				20.883
	KDLYGNIVLSGGTSMYPGINTR	8	511086192;511084606;511085271;511085359;511085803;511087894;511088092;511083523	M15(Oxidation)			6.04019
	AASSSELEKSYELPDGQVITVGNER	8	511086192;511084606;511085359;511087894;511083523;511085271;511088092;511085803				9.10351
	TTGIVMDSGDGVSHTVPIYEGFSLPHAILR	31	511086192;511084606;511085359;511087894;511085803				17.0184
	TTGIVMDSGDGVSHTVPIYEGFSLPHAILR	29	511086192;511084606;511085359;511087894;511085803	M6(Oxidation)			4.92867
	CDVDIRK	10	511086192;511084606;511085271;511085359;511085803;511087894;511088092;511083523	C1(Nethylmaleimide+water)			16.0853
	CPEALFRPSFLGMECNGIHETTYNSIMK	3	511085359	C1(Carbamidomethyl); M13(Oxidation); C15(Oxidation)			#DIV/0!
	CDVDIRK	2	511086192;511084606;511085271;511085359;511085803;511087894;511088092;511083523	C1(Carbamidomethyl)			#DIV/0!
	LCYVAEDFNEEMQK	10	511086192;511084606;511085359;511087894;511083523;511085271;511088092;511085803	C2(Nethylmaleimide+water); M12(Oxidation)			#DIV/0!
	EKLCYVAEDFNEEMQK	2	511086192;511084606;511085359;511087894;511083523;511085271;511088092;511085803	C4(Carbamidomethyl); M14(Oxidation)			#DIV/0!
	DLYGNIVLSGGTSMYPGINTR	21	511086192;511084606;511085271;511085359;511085803;511087894;511088092;511083523				#DIV/0!
	VAPEEHPVLLTEAPMNPKANREK	1	511083523;511084606;511085271;511085359;511087894;511088092;511086192				#DIV/0!
	EKLCYVAEDFNEEMQK	1	511086192;511084606;511085359;511087894;511083523;511085271;511088092;511085803	C4(Nethylmaleimide+water)			#DIV/0!
	CPEALFRPSFLGMECNGIHETTYNSIMK	1	511085359	C1(Carbamidomethyl); M13(Oxidation); C15(Oxidation); M27(Oxidation)			#DIV/0!
	FRCPEALFRPSFLGMECNGIHETTYNSIMK	2	511085359	C3(Carbamidomethyl); M15(Oxidation); C17(Oxidation); M29(Oxidation)			#DIV/0!
	FRCPEALFRPSFLGMECNGIHETTYNSIMK	1	511085359	C3(Carbamidomethyl); M15(Oxidation); C17(Oxidation)			#DIV/0!
	CPEALFRPSFLGMECNGIHETTYNSIMK	1	511085359	C1(Nethylmaleimide+water); M13(Oxidation); C15(Oxidation)			#DIV/0!
	CPEALFRPSFLGMECNGIHETTYNSIMK	2	511085359	C1(Nethylmaleimide); M13(Oxidation); C15(Oxidation)			#DIV/0!
	CDVDIRK	7	511086192;511084606;511085271;511085359;511085803;511087894;511088092;511083523	C1(Nethylmaleimide)			13.9089
	CDVDIR	3	511086192;511084606;511085271;511085359;511085803;511087894;511088092;511083523	C1(Carbamidomethyl)			14.4139
	CDVDIR	3	511086192;511084606;511085271;511085359;511085803;511087894;511088092;511083523	C1(Nethylmaleimide+water)			#DIV/0!
	LDLAGR	7	511086192;511084606;511085359;511087894;511083523;511085271;511088092;511085803				7.2296
511086192	actin, putative [Entamoeba histolytica]	76.33	1	33	41.9928	5.32568	6.10663
	Sequence	# PSMs	Protein Group Accessions	Modifications			#VALUE!
	VIAPPERK	10	511086192;511084606;511085271;511085359;511085803;511087894;511088092;511083523				9.10466
	AASSSELEK	7	511086192;511084606;511085359;511087894;511083523;511085271;511088092;511085803				14.1894
	AVFPSIVGR	8	511086192				6.30052
	AGFAGDDAPR	22	511083523;511084606;511085271;511085359;511087894;511088092;511085803;511086192				9.29538
	DLTDYLMK	40	511086192;511084606;511085359;511087894;511083523;511085271;511088092;511085803				4.92966
	DLTDYLMK	19	511086192;511084606;511085359;511087894;511083523;511085271;511088092;511085803	M7(Oxidation)			3.65803
	IKVIAPPER	12	511086192;511084606;511085271;511085359;511085803;511087894;511088092				6.41235
	GYAFTTTAER	23	511086192;511084606;511085359;511087894;511083523;511085271;511088092				3.5399
	HVSVMAGMGQK	22	511083523;511084606;511085271;511085359;511087894;511088092;511085803;511086192				10.6449
	IKVIAPPERK	8	511086192;511084606;511085271;511085359;511085803;511087894;511088092				8.94168
	HVSVMAGMGQK	34	511083523;511084606;511085271;511085359;511087894;511088092;511085803;511086192	M8(Oxidation)			9.63597
	HVSVMAGMGQK	10	511083523;511084606;511085271;511085359;511087894;511088092;511085803;511086192	M5(Oxidation); M8(Oxidation)			7.94228
	DAYVGDEAQSK	20	511083523;511084606;511085271;511085359;511087894;511088092;511086192				14.8521
	EMIQLAPPTMK	14	511086192;511084606;511085271;511085359;511085803;511087894;511088092;511083523				4.60664
	EMIQLAPPTMK	35	511086192;511084606;511085271;511085359;511085803;511087894;511088092;511083523	M2(Oxidation)			3.85064
	EMIQLAPPTMK	10	511086192;511084606;511085271;511085359;511085803;511087894;511088092;511083523	M2(Oxidation); M10(Oxidation)			2.66952
	DAYVGDEAQSKR	22	511083523;511084606;511085271;511085359;511087894;511088092;511086192				11.1778
	EEYDESGPAIVHR	16	511086192;511084606;511085271;511085359;511085803;511087894;511088092;511083523				5.22112
	IWHHTFYNELR	31	511083523;511084606;511085271;511085359;511087894;511088092;511086192;511085803				#DIV/0!
	GYAFTTTAEREIVR	7	511086192;511084606;511085359;511087894;511083523;511085271;511088092				7.86047
	LDLAGRDLTDYLMK	23	511086192;511084606;511085359;511087894;511083523;511085271;511088092;511085803				14.0063
	LEKEMIQLAPPTMK	14	511086192;511084606;511085271;511085359;511085803;511087894;511088092;511083523				15.3247
	EEYDESGPAIVHRK	14	511086192;511084606;511085271;511085359;511085803;511087894;511088092;511083523				6.32357
	LDLAGRDLTDYLMK	13	511086192;511084606;511085359;511087894;511083523;511085271;511088092;511085803	M13(Oxidation)			5.38825
	LEKEMIQLAPPTMK	30	511086192;511084606;511085271;511085359;511085803;511087894;511088092;511083523	M5(Oxidation)			6.33825
	LEKEMIQLAPPTMK	14	511086192;511084606;511085271;511085359;511085803;511087894;511088092;511083523	M5(Oxidation); M13(Oxidation)			126.5
	LCYVAEDFNEEMQK	30	511086192;511084606;511085359;511087894;511083523;511085271;511088092;511085803	C2(Carbamidomethyl)			5.91572
	SYELPDGQVITVGNER	58	511086192;511084606;511085359;511087894;511083523;511085271;511088092;511085803				2.46492
	LCYVAEDFNEEMQK	23	511086192;511084606;511085359;511087894;511083523;511085271;511088092;511085803	C2(Carbamidomethyl); M12(Oxidation)			3.85199
	LCYVAEDFNEEMQK	22	511086192;511084606;511085359;511087894;511083523;511085271;511088092;511085803	C2(Nethylmaleimide)			9.88896
	LCYVAEDFNEEMQK	6	511086192;511084606;511085359;511087894;511083523;511085271;511088092;511085803	C2(Nethylmaleimide); M12(Oxidation)			#DIV/0!
	LCYVAEDFNEEMQK	23	511086192;511084606;511085359;511087894;511083523;511085271;511088092;511085803	C2(Nethylmaleimide+water)			17.81
	YPIEHGIVNNWDDMEK	15	511083523;511084606;511085271;511085359;511087894;511088092;511086192;511085803				10.6444
	VAPEEHPVLLTEAPMNPK	30	511083523;511084606;511085271;511085359;511087894;511088092;511086192				6.5511
	YPIEHGIVNNWDDMEK	8	511083523;511084606;511085271;511085359;511087894;511088092;511086192;511085803	M14(Oxidation)			91.6629
	VAPEEHPVLLTEAPMNPK	67	511083523;511084606;511085271;511085359;511087894;511088092;511086192	M15(Oxidation)			4.97668
	EKLCYVAEDFNEEMQK	6	511086192;511084606;511085359;511087894;511083523;511085271;511088092;511085803	C4(Carbamidomethyl)			4.14876
	DLYGNIVLSGGTSMYPGINTR	10	511086192;511084606;511085271;511085359;511085803;511087894;511088092;511083523	M14(Oxidation)			26.0712
	KDLYGNIVLSGGTSMYPGINTR	4	511086192;511084606;511085271;511085359;511085803;511087894;511088092;511083523				20.883
	KDLYGNIVLSGGTSMYPGINTR	8	511086192;511084606;511085271;511085359;511085803;511087894;511088092;511083523	M15(Oxidation)			6.04019
	AASSSELEKSYELPDGQVITVGNER	8	511086192;511084606;511085359;511087894;511083523;511085271;511088092;511085803				9.10351
	TTGIVMDSGDGVSHTVPIYEGFSLPHAILR	31	511086192;511084606;511085359;511087894;511085803				17.0184
	TTGIVMDSGDGVSHTVPIYEGFSLPHAILR	29	511086192;511084606;511085359;511087894;511085803	M6(Oxidation)			4.92867
	CDVDIRK	10	511086192;511084606;511085271;511085359;511085803;511087894;511088092;511083523	C1(Nethylmaleimide+water)			16.0853
	CDVDIRK	2	511086192;511084606;511085271;511085359;511085803;511087894;511088092;511083523	C1(Carbamidomethyl)			#DIV/0!
	LCYVAEDFNEEMQK	10	511086192;511084606;511085359;511087894;511083523;511085271;511088092;511085803	C2(Nethylmaleimide+water); M12(Oxidation)			#DIV/0!
	EKLCYVAEDFNEEMQK	2	511086192;511084606;511085359;511087894;511083523;511085271;511088092;511085803	C4(Carbamidomethyl); M14(Oxidation)			#DIV/0!
	DLYGNIVLSGGTSMYPGINTR	21	511086192;511084606;511085271;511085359;511085803;511087894;511088092;511083523				#DIV/0!
	CPEALFQPSFLGMECNGIHETTYNSIMK	2	511086192;511085271;511085803;511088092;511083523	C1(Carbamidomethyl); C15(Carbamidomethyl)			#DIV/0!
	CPEALFQPSFLGMECNGIHETTYNSIMK	4	511086192;511085271;511085803;511088092;511083523	C1(Carbamidomethyl); M13(Oxidation); C15(Carbamidomethyl)			#DIV/0!
	CPEALFQPSFLGMECNGIHETTYNSIMK	5	511086192;511085271;511085803;511088092;511083523	C1(Carbamidomethyl); M13(Oxidation); C15(Carbamidomethyl); M27(Oxidation)			#DIV/0!
	FRCPEALFQPSFLGMECNGIHETTYNSIMK	2	511086192;511085271;511085803;511088092;511083523	C3(Carbamidomethyl); C17(Carbamidomethyl)			#DIV/0!
	FRCPEALFQPSFLGMECNGIHETTYNSIMK	2	511086192;511085271;511085803;511088092;511083523	C3(Carbamidomethyl); M15(Oxidation); C17(Carbamidomethyl)			#DIV/0!
	VAPEEHPVLLTEAPMNPKANREK	1	511083523;511084606;511085271;511085359;511087894;511088092;511086192				#DIV/0!
	EKLCYVAEDFNEEMQK	1	511086192;511084606;511085359;511087894;511083523;511085271;511088092;511085803	C4(Nethylmaleimide+water)			#DIV/0!
	FRCPEALFQPSFLGMECNGIHETTYNSIMK	1	511086192;511085271;511085803;511088092;511083523	C3(Carbamidomethyl); C17(Nethylmaleimide+water)			#DIV/0!
	CPEALFQPSFLGMECNGIHETTYNSIMK	1	511086192;511085271;511085803;511088092;511083523	C1(Carbamidomethyl); C15(Nethylmaleimide+water)			#DIV/0!
	CDVDIRK	7	511086192;511084606;511085271;511085359;511085803;511087894;511088092;511083523	C1(Nethylmaleimide)			13.9089
	CDVDIR	3	511086192;511084606;511085271;511085359;511085803;511087894;511088092;511083523	C1(Carbamidomethyl)			14.4139
	CDVDIR	3	511086192;511084606;511085271;511085359;511085803;511087894;511088092;511083523	C1(Nethylmaleimide+water)			#DIV/0!
	LDLAGR	7	511086192;511084606;511085359;511087894;511083523;511085271;511088092;511085803				7.2296
511087894	actin, putative [Entamoeba histolytica]	76.86	2	33	41.9888	5.32568	5.79642
	Sequence	# PSMs	Protein Group Accessions	Modifications			#VALUE!
	VIAPPERK	10	511086192;511084606;511085271;511085359;511085803;511087894;511088092;511083523				9.10466
	AASSSELEK	7	511086192;511084606;511085359;511087894;511083523;511085271;511088092;511085803				14.1894
	AGFAGDDAPR	22	511083523;511084606;511085271;511085359;511087894;511088092;511085803;511086192				9.29538
	DLTDYLMK	40	511086192;511084606;511085359;511087894;511083523;511085271;511088092;511085803				4.92966
	DLTDYLMK	19	511086192;511084606;511085359;511087894;511083523;511085271;511088092;511085803	M7(Oxidation)			3.65803
	IKVIAPPER	12	511086192;511084606;511085271;511085359;511085803;511087894;511088092				6.41235
	GYAFTTTAER	23	511086192;511084606;511085359;511087894;511083523;511085271;511088092				3.5399
	HVSVMAGMGQK	22	511083523;511084606;511085271;511085359;511087894;511088092;511085803;511086192				10.6449
	IKVIAPPERK	8	511086192;511084606;511085271;511085359;511085803;511087894;511088092				8.94168
	HVSVMAGMGQK	34	511083523;511084606;511085271;511085359;511087894;511088092;511085803;511086192	M8(Oxidation)			9.63597
	HVSVMAGMGQK	10	511083523;511084606;511085271;511085359;511087894;511088092;511085803;511086192	M5(Oxidation); M8(Oxidation)			7.94228
	DAYVGDEAQSK	20	511083523;511084606;511085271;511085359;511087894;511088092;511086192				14.8521
	AVFPSIVGRPR	65	511083523;511084606;511085271;511085359;511087894;511088092;511085803				4.08537
	EMIQLAPPTMK	14	511086192;511084606;511085271;511085359;511085803;511087894;511088092;511083523				4.60664
	EMIQLAPPTMK	35	511086192;511084606;511085271;511085359;511085803;511087894;511088092;511083523	M2(Oxidation)			3.85064
	EMIQLAPPTMK	10	511086192;511084606;511085271;511085359;511085803;511087894;511088092;511083523	M2(Oxidation); M10(Oxidation)			2.66952
	DAYVGDEAQSKR	22	511083523;511084606;511085271;511085359;511087894;511088092;511086192				11.1778
	EEYDESGPAIVHR	16	511086192;511084606;511085271;511085359;511085803;511087894;511088092;511083523				5.22112
	IWHHTFYNELR	31	511083523;511084606;511085271;511085359;511087894;511088092;511086192;511085803				#DIV/0!
	GYAFTTTAEREIVR	7	511086192;511084606;511085359;511087894;511083523;511085271;511088092				7.86047
	LDLAGRDLTDYLMK	23	511086192;511084606;511085359;511087894;511083523;511085271;511088092;511085803				14.0063
	LEKEMIQLAPPTMK	14	511086192;511084606;511085271;511085359;511085803;511087894;511088092;511083523				15.3247
	EEYDESGPAIVHRK	14	511086192;511084606;511085271;511085359;511085803;511087894;511088092;511083523				6.32357
	LDLAGRDLTDYLMK	13	511086192;511084606;511085359;511087894;511083523;511085271;511088092;511085803	M13(Oxidation)			5.38825
	LEKEMIQLAPPTMK	30	511086192;511084606;511085271;511085359;511085803;511087894;511088092;511083523	M5(Oxidation)			6.33825
	LEKEMIQLAPPTMK	14	511086192;511084606;511085271;511085359;511085803;511087894;511088092;511083523	M5(Oxidation); M13(Oxidation)			126.5
	LCYVAEDFNEEMQK	30	511086192;511084606;511085359;511087894;511083523;511085271;511088092;511085803	C2(Carbamidomethyl)			5.91572
	SYELPDGQVITVGNER	58	511086192;511084606;511085359;511087894;511083523;511085271;511088092;511085803				2.46492
	LCYVAEDFNEEMQK	23	511086192;511084606;511085359;511087894;511083523;511085271;511088092;511085803	C2(Carbamidomethyl); M12(Oxidation)			3.85199
	LCYVAEDFNEEMQK	22	511086192;511084606;511085359;511087894;511083523;511085271;511088092;511085803	C2(Nethylmaleimide)			9.88896
	LCYVAEDFNEEMQK	6	511086192;511084606;511085359;511087894;511083523;511085271;511088092;511085803	C2(Nethylmaleimide); M12(Oxidation)			#DIV/0!
	LCYVAEDFNEEMQK	23	511086192;511084606;511085359;511087894;511083523;511085271;511088092;511085803	C2(Nethylmaleimide+water)			17.81
	YPIEHGIVNNWDDMEK	15	511083523;511084606;511085271;511085359;511087894;511088092;511086192;511085803				10.6444
	VAPEEHPVLLTEAPMNPK	30	511083523;511084606;511085271;511085359;511087894;511088092;511086192				6.5511
	YPIEHGIVNNWDDMEK	8	511083523;511084606;511085271;511085359;511087894;511088092;511086192;511085803	M14(Oxidation)			91.6629
	VAPEEHPVLLTEAPMNPK	67	511083523;511084606;511085271;511085359;511087894;511088092;511086192	M15(Oxidation)			4.97668
	EKLCYVAEDFNEEMQK	6	511086192;511084606;511085359;511087894;511083523;511085271;511088092;511085803	C4(Carbamidomethyl)			4.14876
	DLYGNIVLSGGTSMYPGINTR	10	511086192;511084606;511085271;511085359;511085803;511087894;511088092;511083523	M14(Oxidation)			26.0712
	KDLYGNIVLSGGTSMYPGINTR	4	511086192;511084606;511085271;511085359;511085803;511087894;511088092;511083523				20.883
	KDLYGNIVLSGGTSMYPGINTR	8	511086192;511084606;511085271;511085359;511085803;511087894;511088092;511083523	M15(Oxidation)			6.04019
	AASSSELEKSYELPDGQVITVGNER	8	511086192;511084606;511085359;511087894;511083523;511085271;511088092;511085803				9.10351
	TTGIVMDSGDGVSHTVPIYEGFSLPHAILR	31	511086192;511084606;511085359;511087894;511085803				17.0184
	TTGIVMDSGDGVSHTVPIYEGFSLPHAILR	29	511086192;511084606;511085359;511087894;511085803	M6(Oxidation)			4.92867
	CPEALFQPSFLGMECNGIHETTYNSVMK	4	511087894	C1(Carbamidomethyl); M13(Oxidation); C15(Carbamidomethyl); M27(Oxidation)			2.01411
	CDVDIRK	10	511086192;511084606;511085271;511085359;511085803;511087894;511088092;511083523	C1(Nethylmaleimide+water)			16.0853
	CPEALFQPSFLGMECNGIHETTYNSVMK	5	511087894	C1(Carbamidomethyl); C15(Carbamidomethyl); M27(Oxidation)			0
	CDVDIRK	2	511086192;511084606;511085271;511085359;511085803;511087894;511088092;511083523	C1(Carbamidomethyl)			#DIV/0!
	LCYVAEDFNEEMQK	10	511086192;511084606;511085359;511087894;511083523;511085271;511088092;511085803	C2(Nethylmaleimide+water); M12(Oxidation)			#DIV/0!
	EKLCYVAEDFNEEMQK	2	511086192;511084606;511085359;511087894;511083523;511085271;511088092;511085803	C4(Carbamidomethyl); M14(Oxidation)			#DIV/0!
	DLYGNIVLSGGTSMYPGINTR	21	511086192;511084606;511085271;511085359;511085803;511087894;511088092;511083523				#DIV/0!
	CPEALFQPSFLGMECNGIHETTYNSVMK	3	511087894	C1(Carbamidomethyl); M13(Oxidation); C15(Nethylmaleimide)			#DIV/0!
	CPEALFQPSFLGMECNGIHETTYNSVMK	2	511087894	C1(Carbamidomethyl); M13(Oxidation); C15(Nethylmaleimide); M27(Oxidation)			#DIV/0!
	CPEALFQPSFLGMECNGIHETTYNSVMK	7	511087894	C1(Carbamidomethyl); C15(Nethylmaleimide+water); M27(Oxidation)			#DIV/0!
	VAPEEHPVLLTEAPMNPKANREK	1	511083523;511084606;511085271;511085359;511087894;511088092;511086192				#DIV/0!
	EKLCYVAEDFNEEMQK	1	511086192;511084606;511085359;511087894;511083523;511085271;511088092;511085803	C4(Nethylmaleimide+water)			#DIV/0!
	FRCPEALFQPSFLGMECNGIHETTYNSVMK	1	511087894	C3(Carbamidomethyl); M15(Oxidation); C17(Carbamidomethyl); M29(Oxidation)			#DIV/0!
	FRCPEALFQPSFLGMECNGIHETTYNSVMK	1	511087894	C3(Carbamidomethyl); C17(Carbamidomethyl); M29(Oxidation)			#DIV/0!
	FRCPEALFQPSFLGMECNGIHETTYNSVMK	1	511087894	C3(Carbamidomethyl); C17(Nethylmaleimide); M29(Oxidation)			#DIV/0!
	CDVDIRK	7	511086192;511084606;511085271;511085359;511085803;511087894;511088092;511083523	C1(Nethylmaleimide)			13.9089
	CDVDIR	3	511086192;511084606;511085271;511085359;511085803;511087894;511088092;511083523	C1(Carbamidomethyl)			14.4139
	CDVDIR	3	511086192;511084606;511085271;511085359;511085803;511087894;511088092;511083523	C1(Nethylmaleimide+water)			#DIV/0!
	LDLAGR	7	511086192;511084606;511085359;511087894;511083523;511085271;511088092;511085803				7.2296
	Sequence	# PSMs	Protein Group Accessions	Modifications			#VALUE!
	AALEAAK	2	103484576				0
	LGYIAAK	2	103484576				0
	GDLAAIHK	2	103484576				0
	GFDEIAER	2	103484576				0
	DGYEIVTR	2	103484576				0
	VDQIVMEK	2	103484576	M6(Oxidation)			0
	CVNVFDIK	4	103484576	C1(Nethylmaleimide)			0
	IWNYLSFK	2	103484576				0
	GDGAVDLAGSVK	4	103484576				0
	ISGEVEISEK	4	103484576				0
	VVDLADVDFK	4	103484576				0
	SIEQDLIEAK	2	103484576				0
	FAELALLFVR	2	103484576				0
	YYLENQSER	4	103484576				0.303882
	LILSLLSNDQK	4	103484576				0.205612
	FAIALQCGNFK	2	103484576	C7(Carbamidomethyl)			0
	DSKDGYEIVTR	4	103484576				0
	GVILYTTNAHIK	4	103484576				0
	LESERPAYFVTGK	3	103484576				0
	VAEFSLVQLGDYSR	4	103484576				0
	YNDSSCWSEGTFR	2	103484576	C6(Carbamidomethyl)			0
	VWDIKDLYENEPR	4	103484576				0
	EVNLNEEKPVFDGVK	4	103484576				0
	HPLENLFAIGCDTGLK	2	103484576	C11(Carbamidomethyl)			0
	SEIPFVISSSYDTTVR	4	103484576				0
	VSYLSAYCGNIQSMVK	2	103484576	C8(Carbamidomethyl)			0
	STYFHPTKPWILSCSDDR	2	103484576	C14(Carbamidomethyl)			0
	GLCFHPNRPLVVSGGDDCVIR	1	103484576	C3(Carbamidomethyl); C18(Carbamidomethyl)			0
	MNLSSLK	2	103484576				#DIV/0!
	SVVIATR	1	103484576				0
	LKEFATK	1	103484576				0
	DSHSDNACVGEFK	2	103484576	C8(Carbamidomethyl)			0
183234048	alcohol dehydrogenase [Entamoeba histolytica HM-1:IMSS]	60.14	4	32	46.5847	6.58057	2.33007
	Sequence	# PSMs	Protein Group Accessions	Modifications			#VALUE!
	IFIVSDR	22	183234048;183232639;472459638;449709136				1.87201
	KYDVMEK	8	183234048;449709136				10.0391
	APIEGQSQLK	10	183234048;449709136				7.17691
	VFFEPFSIR	24	183234048;449709136				6.46691
	YLAELKDLSK	19	183234048;449709136				7.22397
	APIEGQSQLKK	8	183234048;449709136				6.79236
	VAGILLPHIIR	38	183234048;449709136				3.19984
	EILIASYKPIA	8	183234048;449709136				3.61611
	ENVFSGPEVGEK	8	183234048;449709136				4.99392
	LQDIPTQFADIK	8	183234048;449709136				4.68272
	NLVNGYNGCSCAR	6	183234048;449709136	C9(Carbamidomethyl); C11(Carbamidomethyl)			17.4724
	GTESATGFAQCGIDEK	8	183234048;449709136	C11(Carbamidomethyl)			2.4109
	GTESATGFAQCGIDEK	4	183234048;449709136	C11(Nethylmaleimide)			1.25866
	GTESATGFAQCGIDEK	6	183234048;449709136	C11(Nethylmaleimide+water)			2.89052
	DAVHDIAVTTLESQYSK	10	183234048;449709136				3.03273
	ATVPELKEILIASYKPIA	8	183234048				10.0317
	TGLNPGNNAAESLASECEK	20	183234048;449709136	C17(Carbamidomethyl)			6.41425
	TGLNPGNNAAESLASECEK	10	183234048;449709136	C17(Nethylmaleimide)			4.18576
	TGLNPGNNAAESLASECEK	10	183234048;449709136	C17(Nethylmaleimide+water)			4.19306
	KATVPELKEILIASYKPIA	15	183234048				2.38824
	GTESATGFAQCGIDEKEWK	6	183234048;449709136	C11(Carbamidomethyl)			4.10648
	LQDIPTQFADIKENVFSGPEVGEK	14	183234048;449709136				13.917
	TNTTYPIAHYNLIPSVAIVDPEFTYTVPK	8	183234048;449709136				112.16
	ATVPELK	2	183234048				#DIV/0!
	VPPKVFFEPFSIR	4	183234048;449709136				#DIV/0!
	IMWMLYEHPELK	8	183234048;449709136				#DIV/0!
	IMWMLYEHPELK	5	183234048;449709136	M4(Oxidation)			#DIV/0!
	IMWMLYEHPELK	3	183234048;449709136	M2(Oxidation); M4(Oxidation)			#DIV/0!
	GTESATGFAQCGIDEKEWK	2	183234048;449709136	C11(Nethylmaleimide)			#DIV/0!
	EWKDAVHDIAVTTLESQYSK	3	183234048;449709136				#DIV/0!
	ANLHNASTIAGMAHGNAYLGLVHALAYK	2	183234048;449709136				#DIV/0!
	TNTTYPIAHYNLIPSVAIVDPEFTYTVPKR	4	183234048;449709136				#DIV/0!
	GTESATGFAQCGIDEKEWKDAVHDIAVTTLESQYSK	8	183234048;449709136	C11(Carbamidomethyl)			#DIV/0!
	VMEVLKR	4	183234048;449709136				11.8964
	KYDVMEK	2	183234048;449709136	M5(Oxidation)			#DIV/0!
	LGYVER	8	183234048;449709136				9.52807
	KATVPELK	4	183234048				#DIV/0!
	VMEVLK	3	183234048;449709136				#DIV/0!
	YDVMEK	1	183234048;449709136				0
	YLAELK	3	183234048;183232639;472459638;449709136				2.29483
	VMEVLK	1	183234048;449709136	M2(Oxidation)			#DIV/0!
	YDVMEK	1	183234048;449709136	M4(Oxidation)			#DIV/0!
	Sequence	# PSMs	Protein Group Accessions	Modifications			#VALUE!
	TVDGPSGK	7	511084784;511087850;511088431				28.9003
	LTGMSFR	30	511084784;511087850;511088431				8.65016
	VGINGFGR	10	511084784;511087850;511088431				6.5905
	EVTVESIK	17	511084784;511087850;511088431				9.55653
	YMVYLLK	20	511084784;511087850;511088431				5.52739
	YMVYLLK	10	511084784;511087850;511088431	M2(Oxidation)			3.76045
	LVDLIQIISK	89	511084784;511087850;511088431				5.49115
	TVDGPSGKDWR	20	511084784;511087850;511088431				13.6761
	LEKEVTVESIK	18	511084784;511087850;511088431				12.0579
	LVDLIQIISKVH	14	511084784;511087850;511088431				11.4174
	CACANIIPASTGAAK	30	511084784;511087850;511088431	C1(Carbamidomethyl); C3(Carbamidomethyl)			12.2938
	CACANIIPASTGAAK	16	511084784;511087850;511088431	C1(Nethylmaleimide); C3(Carbamidomethyl)			2.41765
	VGTPDVSCVDLTCR	10	511084784;511087850;511088431	C8(Carbamidomethyl); C13(Carbamidomethyl)			5.66726
	CACANIIPASTGAAK	37	511084784;511087850;511088431	C1(Nethylmaleimide+water); C3(Carbamidomethyl)			6.65501
	VGTPDVSCVDLTCR	16	511084784;511087850;511088431	C8(Nethylmaleimide); C13(Carbamidomethyl)			8.57841
	VGTPDVSCVDLTCR	26	511084784;511087850;511088431	C8(Carbamidomethyl); C13(Nethylmaleimide+water)			4.11583
	VGTPDVSCVDLTCR	30	511084784;511087850;511088431	C8(Nethylmaleimide); C13(Nethylmaleimide+water)			5.47228
	VGTPDVSCVDLTCR	16	511084784;511087850;511088431	C8(Nethylmaleimide+water); C13(Nethylmaleimide+water)			7.09408
	DFELVAINDPFMDPK	12	511084784;511087850;511088431				14.9898
	DFELVAINDPFMDPK	12	511084784;511087850;511088431	M12(Oxidation)			8.58601
	LVSWYDNEWGYSNR	45	511084784;511087850;511088431				11.346
	KDFELVAINDPFMDPK	36	511084784;511087850;511088431				10.0868
	KDFELVAINDPFMDPK	50	511084784;511087850;511088431	M13(Oxidation)			4.88834
	SSIFDAAATILLNPHFVK	12	511084784;511087850;511088431				170.677
	VGTPDVSCVDLTCRLEK	13	511084784;511087850;511088431	C8(Carbamidomethyl); C13(Carbamidomethyl)			29.4837
	QFEGTVEAGENAIIVNGHK	18	511084784;511087850;511088431				7.42763
	VGTPDVSCVDLTCRLEK	16	511084784;511087850;511088431	C8(Nethylmaleimide); C13(Carbamidomethyl)			18.8503
	VGTPDVSCVDLTCRLEK	29	511084784;511087850;511088431	C8(Nethylmaleimide+water); C13(Carbamidomethyl)			37.1368
	GILGYTEDLVVSSDFVHDNR	64	511084784;511087850;511088431				178.121
	VINNEFGIVEGLMTTIHATTATQK	28	511084784;511087850;511088431				145.231
	VINNEFGIVEGLMTTIHATTATQK	36	511084784;511087850;511088431	M13(Oxidation)			31.4195
	VGTPDVSCVDLTCRLEK	7	511084784;511087850;511088431	C8(Nethylmaleimide); C13(Nethylmaleimide)			40.547
	ASEGEMK	4	511084784;511087850;511088431				#DIV/0!
	VIPSLNGRLTGMSFR	2	511084784				#DIV/0!
	CACANIIPASTGAAK	2	511084784;511087850;511088431	C1(Nethylmaleimide); C3(Nethylmaleimide+water)			#DIV/0!
	CACANIIPASTGAAK	2	511084784;511087850;511088431	C1(Nethylmaleimide+water); C3(Nethylmaleimide+water)			#DIV/0!
	VGTPDVSCVDLTCR	8	511084784;511087850;511088431	C8(Nethylmaleimide); C13(Nethylmaleimide)			#DIV/0!
	VGTPDVSCVDLTCRLEK	20	511084784;511087850;511088431	C8(Nethylmaleimide); C13(Nethylmaleimide+water)			#DIV/0!
	KDFELVAINDPFMDPKYMVYLLK	2	511084784;511087850;511088431	M18(Oxidation)			#DIV/0!
	DPAQIGWGALGVDYVVESTGVFTTIPK	4	511084784;511087850;511088431				#DIV/0!
	KDFELVAINDPFMDPKYMVYLLK	2	511084784;511087850;511088431	M13(Oxidation); M18(Oxidation)			#DIV/0!
	VGTPDVSCVDLTCRLEKEVTVESIK	3	511084784;511087850;511088431	C8(Carbamidomethyl); C13(Carbamidomethyl)			#DIV/0!
	VGTPDVSCVDLTCRLEKEVTVESIK	3	511084784;511087850;511088431	C8(Nethylmaleimide); C13(Carbamidomethyl)			#DIV/0!
	ASEGEMKGILGYTEDLVVSSDFVHDNR	2	511084784;511087850;511088431	M6(Oxidation)			#DIV/0!
	AERDPAQIGWGALGVDYVVESTGVFTTIPK	26	511084784;511087850;511088431				#DIV/0!
	VIISAPSADAPMFVVGVNTEAYKPEMNIISNASCTTNCLAPLAK	1	511084784	M12(Oxidation); M26(Oxidation); C34(Carbamidomethyl); C38(Carbamidomethyl)			#DIV/0!
	KVIISAPSADAPMFVVGVNTEAYKPEMNIISNASCTTNCLAPLAK	4	511084784	C35(Carbamidomethyl); C39(Carbamidomethyl)			#DIV/0!
	KVIISAPSADAPMFVVGVNTEAYKPEMNIISNASCTTNCLAPLAK	2	511084784	M27(Oxidation); C35(Carbamidomethyl); C39(Carbamidomethyl)			#DIV/0!
	VGTPDVSCVDLTCRLEK	2	511084784;511087850;511088431	C8(Nethylmaleimide+water); C13(Nethylmaleimide+water)			#DIV/0!
	VGTPDVSCVDLTCRLEKEVTVESIK	4	511084784;511087850;511088431	C8(Carbamidomethyl); C13(Nethylmaleimide+water)			#DIV/0!
	KVIISAPSADAPMFVVGVNTEAYKPEMNIISNASCTTNCLAPLAK	1	511084784	M13(Oxidation); C39(Nethylmaleimide)			#DIV/0!
	VGTPDVSCVDLTCRLEKEVTVESIK	3	511084784;511087850;511088431	C8(Nethylmaleimide); C13(Nethylmaleimide+water)			#DIV/0!
	KVIISAPSADAPMFVVGVNTEAYKPEMNIISNASCTTNCLAPLAK	1	511084784	C35(Nethylmaleimide)			#DIV/0!
	LTGMSFR	9	511084784;511087850;511088431	M4(Oxidation)			8.26275
	KASEGEMK	5	511084784;511087850;511088431				60.2987
	YDTVHR	4	511084784;511087850;511088431				14.8213
	AGRCACANIIPASTGAAK	1	511084784;511087850;511088431	C4(Carbamidomethyl); C6(Carbamidomethyl)			#DIV/0!
	AEAHIK	2	511084784;511087850;511088431				39.0331
511087850	glyceraldehyde-3-phosphate dehydrogenase, putative [Entamoeba histolytica]	90.42	2	32	35.9767	7.43018	7.04535
	Sequence	# PSMs	Protein Group Accessions	Modifications			#VALUE!
	TVDGPSGK	7	511084784;511087850;511088431				28.9003
	LTGMSFR	30	511084784;511087850;511088431				8.65016
	VGINGFGR	10	511084784;511087850;511088431				6.5905
	VIPSLNGK	9	511087850;511088431				10.1234
	EVTVESIK	17	511084784;511087850;511088431				9.55653
	YMVYLLK	20	511084784;511087850;511088431				5.52739
	YMVYLLK	10	511084784;511087850;511088431	M2(Oxidation)			3.76045
	LVDLIQIISK	89	511084784;511087850;511088431				5.49115
	TVDGPSGKDWR	20	511084784;511087850;511088431				13.6761
	LEKEVTVESIK	18	511084784;511087850;511088431				12.0579
	LVDLIQIISKVH	14	511084784;511087850;511088431				11.4174
	CACANIIPASTGAAK	30	511084784;511087850;511088431	C1(Carbamidomethyl); C3(Carbamidomethyl)			12.2938
	CACANIIPASTGAAK	16	511084784;511087850;511088431	C1(Nethylmaleimide); C3(Carbamidomethyl)			2.41765
	VGTPDVSCVDLTCR	10	511084784;511087850;511088431	C8(Carbamidomethyl); C13(Carbamidomethyl)			5.66726
	CACANIIPASTGAAK	37	511084784;511087850;511088431	C1(Nethylmaleimide+water); C3(Carbamidomethyl)			6.65501
	VGTPDVSCVDLTCR	16	511084784;511087850;511088431	C8(Nethylmaleimide); C13(Carbamidomethyl)			8.57841
	VGTPDVSCVDLTCR	26	511084784;511087850;511088431	C8(Carbamidomethyl); C13(Nethylmaleimide+water)			4.11583
	VGTPDVSCVDLTCR	30	511084784;511087850;511088431	C8(Nethylmaleimide); C13(Nethylmaleimide+water)			5.47228
	VGTPDVSCVDLTCR	16	511084784;511087850;511088431	C8(Nethylmaleimide+water); C13(Nethylmaleimide+water)			7.09408
	DFELVAINDPFMDPK	12	511084784;511087850;511088431				14.9898
	DFELVAINDPFMDPK	12	511084784;511087850;511088431	M12(Oxidation)			8.58601
	LVSWYDNEWGYSNR	45	511084784;511087850;511088431				11.346
	KDFELVAINDPFMDPK	36	511084784;511087850;511088431				10.0868
	KDFELVAINDPFMDPK	50	511084784;511087850;511088431	M13(Oxidation)			4.88834
	SSIFDAAATILLNPHFVK	12	511084784;511087850;511088431				170.677
	VGTPDVSCVDLTCRLEK	13	511084784;511087850;511088431	C8(Carbamidomethyl); C13(Carbamidomethyl)			29.4837
	QFEGTVEAGENAIIVNGHK	18	511084784;511087850;511088431				7.42763
	VGTPDVSCVDLTCRLEK	16	511084784;511087850;511088431	C8(Nethylmaleimide); C13(Carbamidomethyl)			18.8503
	VGTPDVSCVDLTCRLEK	29	511084784;511087850;511088431	C8(Nethylmaleimide+water); C13(Carbamidomethyl)			37.1368
	GILGYTEDLVVSSDFVHDNR	64	511084784;511087850;511088431				178.121
	VINNEFGIVEGLMTTIHATTATQK	28	511084784;511087850;511088431				145.231
	VINNEFGIVEGLMTTIHATTATQK	36	511084784;511087850;511088431	M13(Oxidation)			31.4195
	VGTPDVSCVDLTCRLEK	7	511084784;511087850;511088431	C8(Nethylmaleimide); C13(Nethylmaleimide)			40.547
	ASEGEMK	4	511084784;511087850;511088431				#DIV/0!
	CACANIIPASTGAAK	2	511084784;511087850;511088431	C1(Nethylmaleimide); C3(Nethylmaleimide+water)			#DIV/0!
	CACANIIPASTGAAK	2	511084784;511087850;511088431	C1(Nethylmaleimide+water); C3(Nethylmaleimide+water)			#DIV/0!
	VGTPDVSCVDLTCR	8	511084784;511087850;511088431	C8(Nethylmaleimide); C13(Nethylmaleimide)			#DIV/0!
	VGTPDVSCVDLTCRLEK	20	511084784;511087850;511088431	C8(Nethylmaleimide); C13(Nethylmaleimide+water)			#DIV/0!
	KDFELVAINDPFMDPKYMVYLLK	2	511084784;511087850;511088431	M18(Oxidation)			#DIV/0!
	DPAQIGWGALGVDYVVESTGVFTTIPK	4	511084784;511087850;511088431				#DIV/0!
	KDFELVAINDPFMDPKYMVYLLK	2	511084784;511087850;511088431	M13(Oxidation); M18(Oxidation)			#DIV/0!
	VGTPDVSCVDLTCRLEKEVTVESIK	3	511084784;511087850;511088431	C8(Carbamidomethyl); C13(Carbamidomethyl)			#DIV/0!
	VGTPDVSCVDLTCRLEKEVTVESIK	3	511084784;511087850;511088431	C8(Nethylmaleimide); C13(Carbamidomethyl)			#DIV/0!
	ASEGEMKGILGYTEDLVVSSDFVHDNR	2	511084784;511087850;511088431	M6(Oxidation)			#DIV/0!
	AERDPAQIGWGALGVDYVVESTGVFTTIPK	26	511084784;511087850;511088431				#DIV/0!
	VIVSAPSADAPMFVVGVNTEAYKPEMNIISNASCTTNCLAPLAK	5	511087850	M12(Oxidation); C34(Carbamidomethyl); C38(Carbamidomethyl)			#DIV/0!
	KVIVSAPSADAPMFVVGVNTEAYKPEMNIISNASCTTNCLAPLAK	3	511087850	M13(Oxidation); C35(Carbamidomethyl); C39(Carbamidomethyl)			#DIV/0!
	VGTPDVSCVDLTCRLEK	2	511084784;511087850;511088431	C8(Nethylmaleimide+water); C13(Nethylmaleimide+water)			#DIV/0!
	VGTPDVSCVDLTCRLEKEVTVESIK	4	511084784;511087850;511088431	C8(Carbamidomethyl); C13(Nethylmaleimide+water)			#DIV/0!
	VGTPDVSCVDLTCRLEKEVTVESIK	3	511084784;511087850;511088431	C8(Nethylmaleimide); C13(Nethylmaleimide+water)			#DIV/0!
	VIVSAPSADAPMFVVGVNTEAYKPEMNIISNASCTTNCLAPLAK	2	511087850	M12(Oxidation); M26(Oxidation); C34(Carbamidomethyl); C38(Carbamidomethyl)			#DIV/0!
	LTGMSFR	9	511084784;511087850;511088431	M4(Oxidation)			8.26275
	KASEGEMK	5	511084784;511087850;511088431				60.2987
	YDTVHR	4	511084784;511087850;511088431				14.8213
	AGRCACANIIPASTGAAK	1	511084784;511087850;511088431	C4(Carbamidomethyl); C6(Carbamidomethyl)			#DIV/0!
	AEAHIK	2	511084784;511087850;511088431				39.0331
511088431	glyceraldehyde-3-phosphate dehydrogenase, putative [Entamoeba histolytica]	90.42	2	32	35.9327	7.73779	7.04535
	Sequence	# PSMs	Protein Group Accessions	Modifications			#VALUE!
	TVDGPSGK	7	511084784;511087850;511088431				28.9003
	LTGMSFR	30	511084784;511087850;511088431				8.65016
	VGINGFGR	10	511084784;511087850;511088431				6.5905
	VIPSLNGK	9	511087850;511088431				10.1234
	EVTVESIK	17	511084784;511087850;511088431				9.55653
	YMVYLLK	20	511084784;511087850;511088431				5.52739
	YMVYLLK	10	511084784;511087850;511088431	M2(Oxidation)			3.76045
	LVDLIQIISK	89	511084784;511087850;511088431				5.49115
	TVDGPSGKDWR	20	511084784;511087850;511088431				13.6761
	LEKEVTVESIK	18	511084784;511087850;511088431				12.0579
	LVDLIQIISKVH	14	511084784;511087850;511088431				11.4174
	CACANIIPASTGAAK	30	511084784;511087850;511088431	C1(Carbamidomethyl); C3(Carbamidomethyl)			12.2938
	CACANIIPASTGAAK	16	511084784;511087850;511088431	C1(Nethylmaleimide); C3(Carbamidomethyl)			2.41765
	VGTPDVSCVDLTCR	10	511084784;511087850;511088431	C8(Carbamidomethyl); C13(Carbamidomethyl)			5.66726
	CACANIIPASTGAAK	37	511084784;511087850;511088431	C1(Nethylmaleimide+water); C3(Carbamidomethyl)			6.65501
	VGTPDVSCVDLTCR	16	511084784;511087850;511088431	C8(Nethylmaleimide); C13(Carbamidomethyl)			8.57841
	VGTPDVSCVDLTCR	26	511084784;511087850;511088431	C8(Carbamidomethyl); C13(Nethylmaleimide+water)			4.11583
	VGTPDVSCVDLTCR	30	511084784;511087850;511088431	C8(Nethylmaleimide); C13(Nethylmaleimide+water)			5.47228
	VGTPDVSCVDLTCR	16	511084784;511087850;511088431	C8(Nethylmaleimide+water); C13(Nethylmaleimide+water)			7.09408
	DFELVAINDPFMDPK	12	511084784;511087850;511088431				14.9898
	DFELVAINDPFMDPK	12	511084784;511087850;511088431	M12(Oxidation)			8.58601
	LVSWYDNEWGYSNR	45	511084784;511087850;511088431				11.346
	KDFELVAINDPFMDPK	36	511084784;511087850;511088431				10.0868
	KDFELVAINDPFMDPK	50	511084784;511087850;511088431	M13(Oxidation)			4.88834
	SSIFDAAATILLNPHFVK	12	511084784;511087850;511088431				170.677
	VGTPDVSCVDLTCRLEK	13	511084784;511087850;511088431	C8(Carbamidomethyl); C13(Carbamidomethyl)			29.4837
	QFEGTVEAGENAIIVNGHK	18	511084784;511087850;511088431				7.42763
	VGTPDVSCVDLTCRLEK	16	511084784;511087850;511088431	C8(Nethylmaleimide); C13(Carbamidomethyl)			18.8503
	VGTPDVSCVDLTCRLEK	29	511084784;511087850;511088431	C8(Nethylmaleimide+water); C13(Carbamidomethyl)			37.1368
	GILGYTEDLVVSSDFVHDNR	64	511084784;511087850;511088431				178.121
	VINNEFGIVEGLMTTIHATTATQK	28	511084784;511087850;511088431				145.231
	VINNEFGIVEGLMTTIHATTATQK	36	511084784;511087850;511088431	M13(Oxidation)			31.4195
	VGTPDVSCVDLTCRLEK	7	511084784;511087850;511088431	C8(Nethylmaleimide); C13(Nethylmaleimide)			40.547
	ASEGEMK	4	511084784;511087850;511088431				#DIV/0!
	CACANIIPASTGAAK	2	511084784;511087850;511088431	C1(Nethylmaleimide); C3(Nethylmaleimide+water)			#DIV/0!
	CACANIIPASTGAAK	2	511084784;511087850;511088431	C1(Nethylmaleimide+water); C3(Nethylmaleimide+water)			#DIV/0!
	VGTPDVSCVDLTCR	8	511084784;511087850;511088431	C8(Nethylmaleimide); C13(Nethylmaleimide)			#DIV/0!
	VGTPDVSCVDLTCRLEK	20	511084784;511087850;511088431	C8(Nethylmaleimide); C13(Nethylmaleimide+water)			#DIV/0!
	KDFELVAINDPFMDPKYMVYLLK	2	511084784;511087850;511088431	M18(Oxidation)			#DIV/0!
	DPAQIGWGALGVDYVVESTGVFTTIPK	4	511084784;511087850;511088431				#DIV/0!
	KDFELVAINDPFMDPKYMVYLLK	2	511084784;511087850;511088431	M13(Oxidation); M18(Oxidation)			#DIV/0!
	VGTPDVSCVDLTCRLEKEVTVESIK	3	511084784;511087850;511088431	C8(Carbamidomethyl); C13(Carbamidomethyl)			#DIV/0!
	VGTPDVSCVDLTCRLEKEVTVESIK	3	511084784;511087850;511088431	C8(Nethylmaleimide); C13(Carbamidomethyl)			#DIV/0!
	ASEGEMKGILGYTEDLVVSSDFVHDNR	2	511084784;511087850;511088431	M6(Oxidation)			#DIV/0!
	AERDPAQIGWGALGVDYVVESTGVFTTIPK	26	511084784;511087850;511088431				#DIV/0!
	VIISAPSAGAPMFVVGVNTEAYKPEMNIISNASCTTNCLAPLAK	2	511088431	C34(Nethylmaleimide); C38(Carbamidomethyl)			#DIV/0!
	KVIISAPSAGAPMFVVGVNTEAYKPEMNIISNASCTTNCLAPLAK	2	511088431	C35(Nethylmaleimide); C39(Carbamidomethyl)			#DIV/0!
	KVIISAPSAGAPMFVVGVNTEAYKPEMNIISNASCTTNCLAPLAK	6	511088431	M27(Oxidation); C35(Nethylmaleimide); C39(Carbamidomethyl)			#DIV/0!
	VGTPDVSCVDLTCRLEK	2	511084784;511087850;511088431	C8(Nethylmaleimide+water); C13(Nethylmaleimide+water)			#DIV/0!
	VGTPDVSCVDLTCRLEKEVTVESIK	4	511084784;511087850;511088431	C8(Carbamidomethyl); C13(Nethylmaleimide+water)			#DIV/0!
	VGTPDVSCVDLTCRLEKEVTVESIK	3	511084784;511087850;511088431	C8(Nethylmaleimide); C13(Nethylmaleimide+water)			#DIV/0!
	VIISAPSAGAPMFVVGVNTEAYKPEMNIISNASCTTNCLAPLAK	1	511088431	M26(Oxidation); C34(Nethylmaleimide); C38(Carbamidomethyl)			#DIV/0!
	LTGMSFR	9	511084784;511087850;511088431	M4(Oxidation)			8.26275
	KASEGEMK	5	511084784;511087850;511088431				60.2987
	YDTVHR	4	511084784;511087850;511088431				14.8213
	AGRCACANIIPASTGAAK	1	511084784;511087850;511088431	C4(Carbamidomethyl); C6(Carbamidomethyl)			#DIV/0!
	AEAHIK	2	511084784;511087850;511088431				39.0331
	Sequence	# PSMs	Protein Group Accessions	Modifications			#VALUE!
	ELLALPK	5	103484598;459657607				0.86082
	EISNIMVR	2	103484598;459657607				0
	IWYGITLK	3	103484598;459657607				2.52978
	TFIEVVDPR	2	103484598;459657607				0
	LLTSGKDFLR	2	103484598;459657607				0
	CAAAQTTSNIAIK	2	103484598;459657607	C1(Carbamidomethyl)			0
	LAQIDLAAPVSEK	2	103484598;459657607				0
	EYPDALRPSFAK	2	103484598;459657607				0
	TALELLIGMVTKK	6	103484598;459657607				4.17065
	TTVVEVAQQNLPR	6	103484598;459657607				0.861277
	YLNDEILLPVNPK	8	103484598;459657607				1.11171
	INMMIQDNEGNIR	4	103484598;459657607	M3(Oxidation)			2.04606
	LSTQQLEQSVFNVVSK	2	103484598;459657607				0
	SNAGNEQAFINQTIADIK	2	103484598;459657607				#DIV/0!
	SNAGNEQAFINQTIADIKK	8	103484598;459657607				1.66886
	DPADIEEADDDDEVISIPK	2	103484598;459657607				0
	SENSYYRDELFLK	3	103484598;459657607				0.339028
	LFGVTLLK	2	459657607				#DIV/0!
	DIVTSDMKR	1	103484598;459657607				#DIV/0!
	TTDKICGDAILK	4	103484598;459657607	C6(Carbamidomethyl)			#DIV/0!
	HTSLNPDVQASFLEAAFK	2	103484598;459657607				#DIV/0!
	IPASTFIIGTELSKPELAQIIK	2	103484598;459657607				#DIV/0!
	TFIEVVDPRDPADIEEADDDDEVISIPK	2	103484598;459657607				#DIV/0!
	INSVVLK	2	103484598;459657607				0
	DLAAELVK	6	103484598;459657607				1.24822
	ACFMLAIVR	1	103484598;459657607	C2(Carbamidomethyl)			0
	IIEIIK	4	103484598;67468919;459657607				1.4736
	LLGLMMTK	2	103484598;459657607				0
	HIPTMK	1	103484598;459657607				#DIV/0!
	IGFDVK	2	103484598;459657607				2.33444
	DELFLK	1	103484598;459657607				0
511083523	actin [Entamoeba histolytica]	76.33	1	31	41.9307	5.32568	5.79642
	Sequence	# PSMs	Protein Group Accessions	Modifications			#VALUE!
	VIAPPERK	10	511086192;511084606;511085271;511085359;511085803;511087894;511088092;511083523				9.10466
	AASSSELEK	7	511086192;511084606;511085359;511087894;511083523;511085271;511088092;511085803				14.1894
	AGFAGDDAPR	22	511083523;511084606;511085271;511085359;511087894;511088092;511085803;511086192				9.29538
	DLTDYLMK	40	511086192;511084606;511085359;511087894;511083523;511085271;511088092;511085803				4.92966
	DLTDYLMK	19	511086192;511084606;511085359;511087894;511083523;511085271;511088092;511085803	M7(Oxidation)			3.65803
	GYAFTTTAER	23	511086192;511084606;511085359;511087894;511083523;511085271;511088092				3.5399
	HVSVMAGMGQK	22	511083523;511084606;511085271;511085359;511087894;511088092;511085803;511086192				10.6449
	HVSVMAGMGQK	34	511083523;511084606;511085271;511085359;511087894;511088092;511085803;511086192	M8(Oxidation)			9.63597
	HVSVMAGMGQK	10	511083523;511084606;511085271;511085359;511087894;511088092;511085803;511086192	M5(Oxidation); M8(Oxidation)			7.94228
	DAYVGDEAQSK	20	511083523;511084606;511085271;511085359;511087894;511088092;511086192				14.8521
	AVFPSIVGRPR	65	511083523;511084606;511085271;511085359;511087894;511088092;511085803				4.08537
	EMIQLAPPTMK	14	511086192;511084606;511085271;511085359;511085803;511087894;511088092;511083523				4.60664
	EMIQLAPPTMK	35	511086192;511084606;511085271;511085359;511085803;511087894;511088092;511083523	M2(Oxidation)			3.85064
	EMIQLAPPTMK	10	511086192;511084606;511085271;511085359;511085803;511087894;511088092;511083523	M2(Oxidation); M10(Oxidation)			2.66952
	DAYVGDEAQSKR	22	511083523;511084606;511085271;511085359;511087894;511088092;511086192				11.1778
	EEYDESGPAIVHR	16	511086192;511084606;511085271;511085359;511085803;511087894;511088092;511083523				5.22112
	IWHHTFYNELR	31	511083523;511084606;511085271;511085359;511087894;511088092;511086192;511085803				#DIV/0!
	GYAFTTTAEREIVR	7	511086192;511084606;511085359;511087894;511083523;511085271;511088092				7.86047
	LDLAGRDLTDYLMK	23	511086192;511084606;511085359;511087894;511083523;511085271;511088092;511085803				14.0063
	LEKEMIQLAPPTMK	14	511086192;511084606;511085271;511085359;511085803;511087894;511088092;511083523				15.3247
	EEYDESGPAIVHRK	14	511086192;511084606;511085271;511085359;511085803;511087894;511088092;511083523				6.32357
	LDLAGRDLTDYLMK	13	511086192;511084606;511085359;511087894;511083523;511085271;511088092;511085803	M13(Oxidation)			5.38825
	LEKEMIQLAPPTMK	30	511086192;511084606;511085271;511085359;511085803;511087894;511088092;511083523	M5(Oxidation)			6.33825
	LEKEMIQLAPPTMK	14	511086192;511084606;511085271;511085359;511085803;511087894;511088092;511083523	M5(Oxidation); M13(Oxidation)			126.5
	LCYVAEDFNEEMQK	30	511086192;511084606;511085359;511087894;511083523;511085271;511088092;511085803	C2(Carbamidomethyl)			5.91572
	SYELPDGQVITVGNER	58	511086192;511084606;511085359;511087894;511083523;511085271;511088092;511085803				2.46492
	LCYVAEDFNEEMQK	23	511086192;511084606;511085359;511087894;511083523;511085271;511088092;511085803	C2(Carbamidomethyl); M12(Oxidation)			3.85199
	LCYVAEDFNEEMQK	22	511086192;511084606;511085359;511087894;511083523;511085271;511088092;511085803	C2(Nethylmaleimide)			9.88896
	LCYVAEDFNEEMQK	6	511086192;511084606;511085359;511087894;511083523;511085271;511088092;511085803	C2(Nethylmaleimide); M12(Oxidation)			#DIV/0!
	LCYVAEDFNEEMQK	23	511086192;511084606;511085359;511087894;511083523;511085271;511088092;511085803	C2(Nethylmaleimide+water)			17.81
	YPIEHGIVNNWDDMEK	15	511083523;511084606;511085271;511085359;511087894;511088092;511086192;511085803				10.6444
	VAPEEHPVLLTEAPMNPK	30	511083523;511084606;511085271;511085359;511087894;511088092;511086192				6.5511
	YPIEHGIVNNWDDMEK	8	511083523;511084606;511085271;511085359;511087894;511088092;511086192;511085803	M14(Oxidation)			91.6629
	VAPEEHPVLLTEAPMNPK	67	511083523;511084606;511085271;511085359;511087894;511088092;511086192	M15(Oxidation)			4.97668
	EKLCYVAEDFNEEMQK	6	511086192;511084606;511085359;511087894;511083523;511085271;511088092;511085803	C4(Carbamidomethyl)			4.14876
	DLYGNIVLSGGTSMYPGINTR	10	511086192;511084606;511085271;511085359;511085803;511087894;511088092;511083523	M14(Oxidation)			26.0712
	KDLYGNIVLSGGTSMYPGINTR	4	511086192;511084606;511085271;511085359;511085803;511087894;511088092;511083523				20.883
	KDLYGNIVLSGGTSMYPGINTR	8	511086192;511084606;511085271;511085359;511085803;511087894;511088092;511083523	M15(Oxidation)			6.04019
	AASSSELEKSYELPDGQVITVGNER	8	511086192;511084606;511085359;511087894;511083523;511085271;511088092;511085803				9.10351
	CDVDIRK	10	511086192;511084606;511085271;511085359;511085803;511087894;511088092;511083523	C1(Nethylmaleimide+water)			16.0853
	CDVDIRK	2	511086192;511084606;511085271;511085359;511085803;511087894;511088092;511083523	C1(Carbamidomethyl)			#DIV/0!
	LCYVAEDFNEEMQK	10	511086192;511084606;511085359;511087894;511083523;511085271;511088092;511085803	C2(Nethylmaleimide+water); M12(Oxidation)			#DIV/0!
	EKLCYVAEDFNEEMQK	2	511086192;511084606;511085359;511087894;511083523;511085271;511088092;511085803	C4(Carbamidomethyl); M14(Oxidation)			#DIV/0!
	DLYGNIVLSGGTSMYPGINTR	21	511086192;511084606;511085271;511085359;511085803;511087894;511088092;511083523				#DIV/0!
	CPEALFQPSFLGMECNGIHETTYNSIMK	2	511086192;511085271;511085803;511088092;511083523	C1(Carbamidomethyl); C15(Carbamidomethyl)			#DIV/0!
	CPEALFQPSFLGMECNGIHETTYNSIMK	4	511086192;511085271;511085803;511088092;511083523	C1(Carbamidomethyl); M13(Oxidation); C15(Carbamidomethyl)			#DIV/0!
	CPEALFQPSFLGMECNGIHETTYNSIMK	5	511086192;511085271;511085803;511088092;511083523	C1(Carbamidomethyl); M13(Oxidation); C15(Carbamidomethyl); M27(Oxidation)			#DIV/0!
	FRCPEALFQPSFLGMECNGIHETTYNSIMK	2	511086192;511085271;511085803;511088092;511083523	C3(Carbamidomethyl); C17(Carbamidomethyl)			#DIV/0!
	FRCPEALFQPSFLGMECNGIHETTYNSIMK	2	511086192;511085271;511085803;511088092;511083523	C3(Carbamidomethyl); M15(Oxidation); C17(Carbamidomethyl)			#DIV/0!
	VAPEEHPVLLTEAPMNPKANREK	1	511083523;511084606;511085271;511085359;511087894;511088092;511086192				#DIV/0!
	EKLCYVAEDFNEEMQK	1	511086192;511084606;511085359;511087894;511083523;511085271;511088092;511085803	C4(Nethylmaleimide+water)			#DIV/0!
	FRCPEALFQPSFLGMECNGIHETTYNSIMK	1	511086192;511085271;511085803;511088092;511083523	C3(Carbamidomethyl); C17(Nethylmaleimide+water)			#DIV/0!
	CPEALFQPSFLGMECNGIHETTYNSIMK	1	511086192;511085271;511085803;511088092;511083523	C1(Carbamidomethyl); C15(Nethylmaleimide+water)			#DIV/0!
	CDVDIRK	7	511086192;511084606;511085271;511085359;511085803;511087894;511088092;511083523	C1(Nethylmaleimide)			13.9089
	TTGIVMDSGDGVSHTVPICEGFSLPHAILR	1	511083523	M6(Oxidation); C19(Nethylmaleimide)			#DIV/0!
	CDVDIR	3	511086192;511084606;511085271;511085359;511085803;511087894;511088092;511083523	C1(Carbamidomethyl)			14.4139
	CDVDIR	3	511086192;511084606;511085271;511085359;511085803;511087894;511088092;511083523	C1(Nethylmaleimide+water)			#DIV/0!
	LDLAGR	7	511086192;511084606;511085359;511087894;511083523;511085271;511088092;511085803				7.2296
	Sequence	# PSMs	Protein Group Accessions	Modifications			#VALUE!
	YAIQTGHR	4	67481173				0
	SDTPLIYR	2	67481173				0
	ELEELTGKK	2	67481173				0
	LSLINSPAVR	8	67481173				0.54766
	VKEGEIASIK	2	67481173				#DIV/0!
	ILPLKQPLR	4	67481173				0.706461
	IANMNDMDR	2	67481173				#DIV/0!
	ESVDNLIIEK	2	67481173				0
	TYVPLFPYFK	8	67481173				0.965943
	FTAEVPDYQGR	4	67481173				0
	GTNLVCPIDFSGK	2	67481173	C6(Carbamidomethyl)			0
	AIPSWFVNVESFK	2	67481173				0
	YIKDCDKDIIER	4	67481173	C5(Carbamidomethyl)			0
	NCVVNGLVLASDGKK	2	67481173	C2(Carbamidomethyl)			0
	VKEGEIASIKDANVTLK	2	67481173				0
	LVESSQQTYWVPENIR	4	67481173				0.58898
	AFPLNYEEK	1	67481173				#DIV/0!
	KYIDALMK	2	67481173				#DIV/0!
	ITIIHGSQEFLDR	2	67481173				#DIV/0!
	NYPDPMDMINLYGADALR	2	67481173				#DIV/0!
	FSFYDGPPFATGLPHYGHLLAGTIK	2	67481173				#DIV/0!
	VVADDYVQNDSGTGIVHQAPGFGEDDYR	2	67481173				#DIV/0!
	SYGVIMK	2	67481173				0
	KIDVFNK	2	67481173				#DIV/0!
	ELEELTGK	1	67481173				0
	YNQECR	4	67481173	C5(Nethylmaleimide)			0
	YAIQTGHRVDR	1	67481173				0
	DANVTLK	2	67481173				0
	FENWLR	2	67481173				0
	YSEEWKK	1	67481173				0
449709136	alcohol dehydrogenase, putative [Entamoeba histolytica KU27]	60.14	2	30	46.6128	6.58057	2.33007
	Sequence	# PSMs	Protein Group Accessions	Modifications			#VALUE!
	IFIVSDR	22	183234048;183232639;472459638;449709136				1.87201
	KYDVMEK	8	183234048;449709136				10.0391
	APIEGQSQLK	10	183234048;449709136				7.17691
	VFFEPFSIR	24	183234048;449709136				6.46691
	YLAELKDLSK	19	183234048;449709136				7.22397
	APIEGQSQLKK	8	183234048;449709136				6.79236
	VAGILLPHIIR	38	183234048;449709136				3.19984
	EILIASYKPIA	8	183234048;449709136				3.61611
	ENVFSGPEVGEK	8	183234048;449709136				4.99392
	LQDIPTQFADIK	8	183234048;449709136				4.68272
	NLVNGYNGCSCAR	6	183234048;449709136	C9(Carbamidomethyl); C11(Carbamidomethyl)			17.4724
	GTESATGFAQCGIDEK	8	183234048;449709136	C11(Carbamidomethyl)			2.4109
	GTESATGFAQCGIDEK	4	183234048;449709136	C11(Nethylmaleimide)			1.25866
	GTESATGFAQCGIDEK	6	183234048;449709136	C11(Nethylmaleimide+water)			2.89052
	DAVHDIAVTTLESQYSK	10	183234048;449709136				3.03273
	TGLNPGNNAAESLASECEK	20	183234048;449709136	C17(Carbamidomethyl)			6.41425
	TGLNPGNNAAESLASECEK	10	183234048;449709136	C17(Nethylmaleimide)			4.18576
	TGLNPGNNAAESLASECEK	10	183234048;449709136	C17(Nethylmaleimide+water)			4.19306
	GTESATGFAQCGIDEKEWK	6	183234048;449709136	C11(Carbamidomethyl)			4.10648
	LQDIPTQFADIKENVFSGPEVGEK	14	183234048;449709136				13.917
	TNTTYPIAHYNLIPSVAIVDPEFTYTVPK	8	183234048;449709136				112.16
	KVTVPELKEILIASYKPIA	9	449709136				14.4273
	VPPKVFFEPFSIR	4	183234048;449709136				#DIV/0!
	IMWMLYEHPELK	8	183234048;449709136				#DIV/0!
	IMWMLYEHPELK	5	183234048;449709136	M4(Oxidation)			#DIV/0!
	IMWMLYEHPELK	3	183234048;449709136	M2(Oxidation); M4(Oxidation)			#DIV/0!
	VTVPELKEILIASYKPIA	4	449709136				#DIV/0!
	GTESATGFAQCGIDEKEWK	2	183234048;449709136	C11(Nethylmaleimide)			#DIV/0!
	EWKDAVHDIAVTTLESQYSK	3	183234048;449709136				#DIV/0!
	ANLHNASTIAGMAHGNAYLGLVHALAYK	2	183234048;449709136				#DIV/0!
	TNTTYPIAHYNLIPSVAIVDPEFTYTVPKR	4	183234048;449709136				#DIV/0!
	GTESATGFAQCGIDEKEWKDAVHDIAVTTLESQYSK	8	183234048;449709136	C11(Carbamidomethyl)			#DIV/0!
	VMEVLKR	4	183234048;449709136				11.8964
	KYDVMEK	2	183234048;449709136	M5(Oxidation)			#DIV/0!
	LGYVER	8	183234048;449709136				9.52807
	VMEVLK	3	183234048;449709136				#DIV/0!
	YDVMEK	1	183234048;449709136				0
	YLAELK	3	183234048;183232639;472459638;449709136				2.29483
	VMEVLK	1	183234048;449709136	M2(Oxidation)			#DIV/0!
	YDVMEK	1	183234048;449709136	M4(Oxidation)			#DIV/0!
449709382	Hypothetical protein EHI5A_012330 [Entamoeba histolytica KU27]	54.36	30	30	63.0643	5.61768	13.9718
	Sequence	# PSMs	Protein Group Accessions	Modifications			#VALUE!
	ENVLNTR	4	449709382				#DIV/0!
	YFISSTSR	6	449709382				10.476
	SLPYIVLDK	9	449709382				9.53335
	SIHEFPEYK	8	449709382				12.6586
	DNTCGAFIIR	6	449709382	C4(Carbamidomethyl)			12.1896
	TDMETVTTDIIR	11	449709382				11.4121
	ITNDGEYIIPER	14	449709382				18.6723
	SLPYIVLDKISMAK	8	449709382				29.2263
	GFLGPEPYQVRYED	4	449709382				26.3572
	FDYSTNTGYPQFLWR	8	449709382				50.8867
	ECPENSNLCVYIPSER	6	449709382	C2(Carbamidomethyl); C9(Carbamidomethyl)			14.9794
	DSTDDTLVYGSHSYQYLK	10	449709382				10.0109
	TNALKFDVK	2	449709382				#DIV/0!
	ADDYKGCPK	4	449709382	C7(Carbamidomethyl)			#DIV/0!
	GEHSEWDER	3	449709382				#DIV/0!
	TIEELKEAVK	3	449709382				#DIV/0!
	YIKENVLNTR	6	449709382				#DIV/0!
	GFLGPEPYQVR	2	449709382				#DIV/0!
	SSFVLSNLPPVK	2	449709382				#DIV/0!
	TDMETVTTDIIR	3	449709382	M3(Oxidation)			#DIV/0!
	CINSDFCDTTKR	4	449709382	C1(Carbamidomethyl); C7(Carbamidomethyl)			#DIV/0!
	VLPESICEYQTNK	2	449709382	C7(Carbamidomethyl)			#DIV/0!
	EITFTDFPLDSYNK	4	449709382				#DIV/0!
	QSYPNNGEFDYSQILK	2	449709382				#DIV/0!
	RFDYSTNTGYPQFLWR	6	449709382				#DIV/0!
	YISLNEQAYAIDAVEACK	6	449709382	C17(Carbamidomethyl)			#DIV/0!
	YGYHVVTIVGYNDNYITK	2	449709382				#DIV/0!
	IPGAEIKECPENSNLCVYIPSER	2	449709382	C9(Carbamidomethyl); C16(Carbamidomethyl)			#DIV/0!
	YSSLSNK	4	449709382				31.4272
[truncated: 4,350 more rows]
